# Supplementary material for: Dearomatized diimines for nickel(ii) and palladium(ii) catalyzed ethylene polymerization and copolymerization
Source: Royal Society of Chemistry journal article supplement (doi:10.1039/d4qi00005f), 2024-01-01
Supplement: d4qi00005f1.pdf [file d4qi00005f1.pdf]

Supplementary Information for:

## **Dearomatized Diimines for Nickel(II) and Palladium(II) Catalyzed Ethylene Polymerization and Copolymerization**

Lihua Guo\*, Wei Zhao, Mingjun Ji, Weiqiang Chen, Pengwei Li, Lijie Li,

Jiaying Li, Zhe Liu

*Key Laboratory of Catalytic Conversion and Clean Energy in Universities of Shandong Province, School of Chemistry and Chemical Engineering, Qufu Normal University, Qufu, 273165, P. R. China*

\*To whom correspondence should be addressed. E-mail: guolihua@qfnu.edu.cn (Lihua Guo).

### **Table of Contents**

|                                                                                |            |
|--------------------------------------------------------------------------------|------------|
| <b>1. Figures.....</b>                                                         | <b>S2</b>  |
| <b>2. General Considerations.....</b>                                          | <b>S2</b>  |
| <b>3. <sup>1</sup>H and <sup>13</sup>C NMR of the Synthetic Compounds.....</b> | <b>S4</b>  |
| 3.1. <sup>1</sup> H and <sup>13</sup> C NMR of ligands.....                    | S4         |
| 3.2. <sup>1</sup> H and <sup>13</sup> C NMR of Palladium Complexes.....        | S6         |
| 3.3. ESI-MS Data.....                                                          | S8         |
| 3.4 <sup>1</sup> H and <sup>13</sup> C NMR of Polymers.....                    | S11        |
| 3.5 DSC, GPC of polymers.....                                                  | S31        |
| <b>4. X-ray Crystallography .....</b>                                          | <b>S73</b> |

## 1. Figures

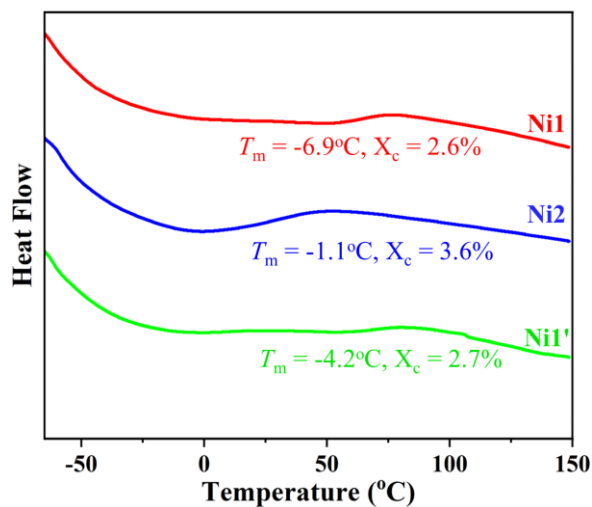

**Figure S1.** Comparisons on the melting points ( $T_m$ ) and crystallinity ( $X_c$ ) of polyethylene generated by **Ni1**, **Ni2** and **Ni1'**.

## 2. General Considerations

All experiments were performed under a dry nitrogen atmosphere using a glove-box or standard Schlenk techniques. Solvent including dichloromethane, n-hexane and toluene were dried and distilled before. Other reagents were obtained from commercial sources and used without purification. Deuterated solvents used for NMR were dried and distilled prior to use.

NMR spectra of ligands and complexes was acquired at 25 °C on Bruker DPX 500 spectrometers using  $\text{CDCl}_3$  as solvent and TMS as an internal standard. The NMR data of polymer samples produced by **Pd1** and **Pd2** were obtained at 25 °C on a Bruker DPX 500 spectrometer, using  $\text{CDCl}_3$  as solvent, while the NMR data of polymer samples produced by **Ni1-Ni4**, **Ni1'** and **Pd3-Pd4** were obtained at 120 °C on a Bruker ARX400 NMR spectrometer, using  $\text{C}_6\text{D}_4\text{Cl}_2$  or  $\text{C}_2\text{D}_2\text{Cl}_4$  as solvent. The chemical shifts of the  $^1\text{H}$  and  $^{13}\text{C}$  NMR spectra were referenced to the tetramethylsilane signal (0 ppm) or residual solvent resonance. Coupling constants are in Hz. Mass spectra were obtained using electro spray ionization (ESI) LCMS-2010A for **L2**, **L4**, **Pd2** and **Pd4**. Mass spectra of **Ni2** and **Ni4** were determined on a Bruker ultraflex extreme MALDI-TOF-MS. Elemental analysis was performed by the Analytical

Center of the Anhui University. X-ray Diffraction data were collected at 298(2) K on a Bruker Smart CCD area detector with graphite-monochromated Mo K $\alpha$  radiation ( $\lambda = 0.71073 \text{ \AA}$ ). Molecular weight and molecular weight distribution of the polymer obtained by **Pd1** and **Pd2** were determined by GPC eluting with THF on a Toshi instrument (Toshi, Tokyo, Japan) equipped with two linear Styragel columns. The system was calibrated with polystyrene standards and operated at 40 °C with a flow rate of 0.35 mL/min. Molecular weight and molecular weight distribution of the polymer obtained by **Ni1-Ni4**, **Ni1'** and **Pd3-Pd4** were determined by gel permeation chromatography (GPC) with a PL-220 equipped with two Agilent PLgel Olexis columns at 150 °C using trichlorobenzene as a solvent, and the calibration was made using polystyrene standard. DSC was performed by a DSC 25 from TA Instruments. Samples were quickly heated to 150 °C and kept for 5 min to remove thermal history, then cooled to -70 °C (or 30 °C) at a rate of 10 K/min, and finally reheated to 150 °C at the same rate under a nitrogen flow (50 mL/min). The maximum points endotherm (heating scan) were taken as the melting temperature ( $T_m$ ).

### 3. $^1\text{H}$ and $^{13}\text{C}$ NMR of the Synthetic Compounds.

#### 3.1. $^1\text{H}$ and $^{13}\text{C}$ NMR of ligands

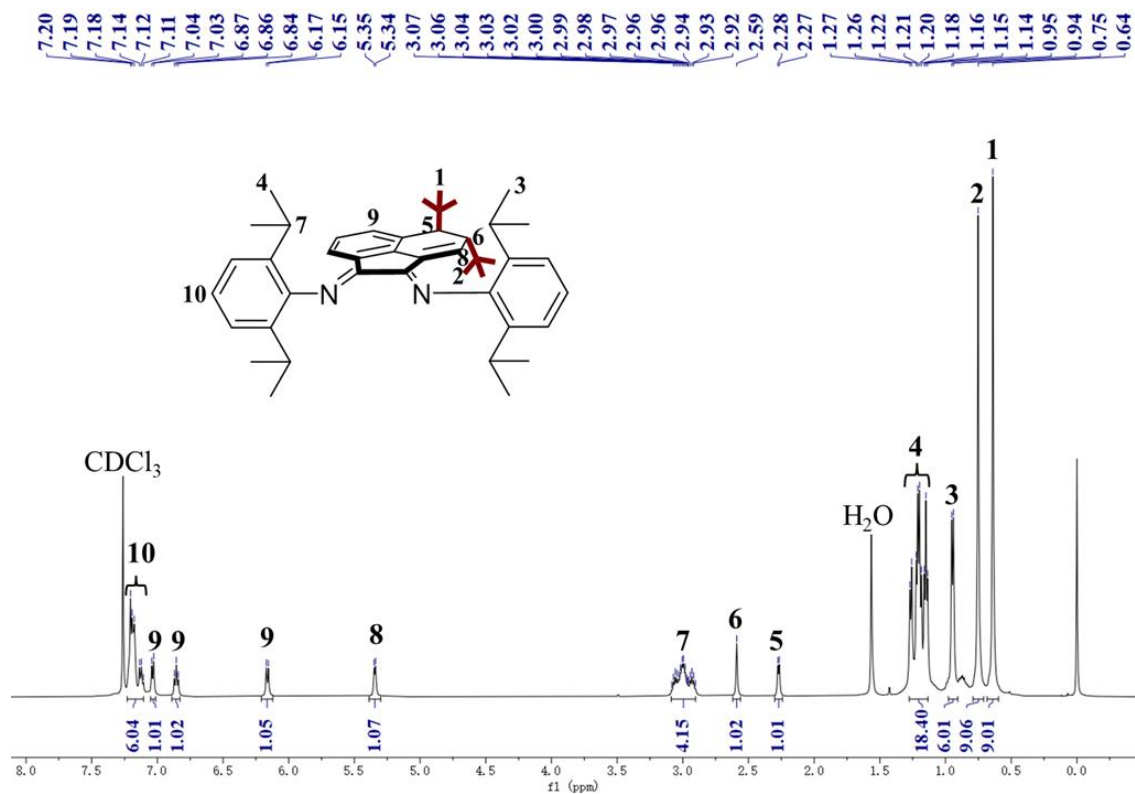

Figure S2.  $^1\text{H}$  NMR spectrum of L2 in CDCl<sub>3</sub>.

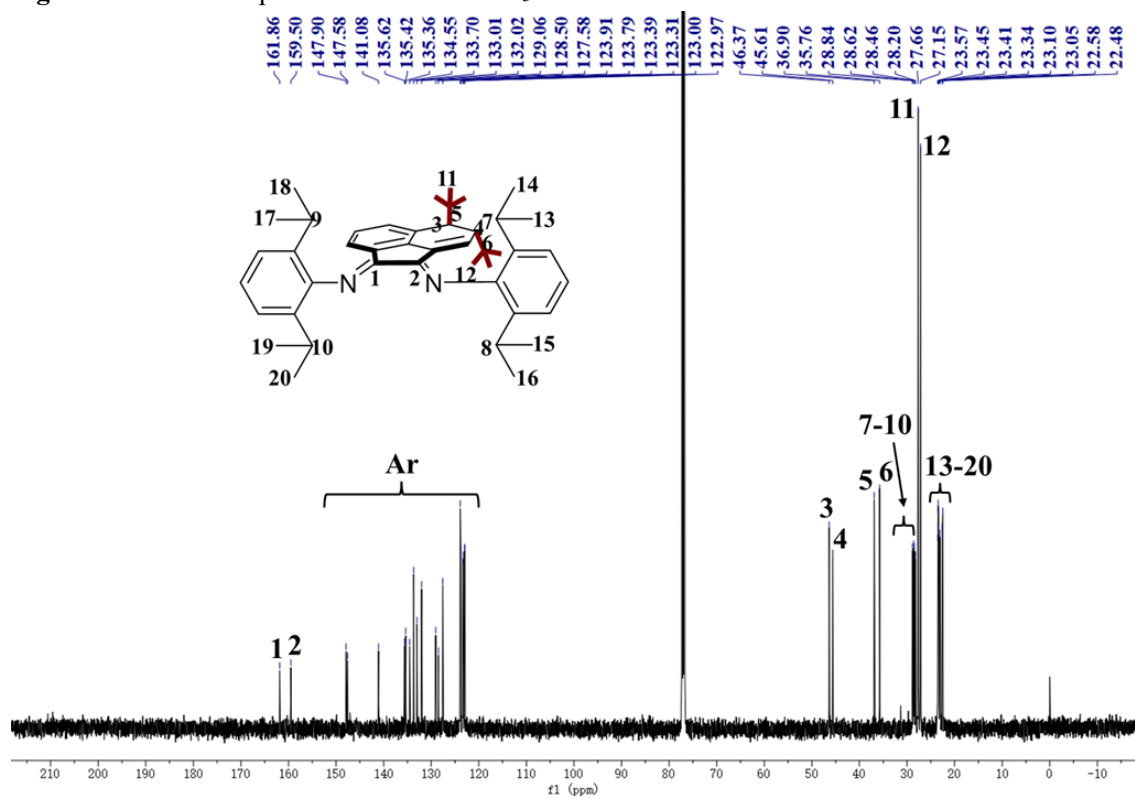

Figure S3.  $^{13}\text{C}$  NMR spectrum of L2 in CDCl<sub>3</sub>.

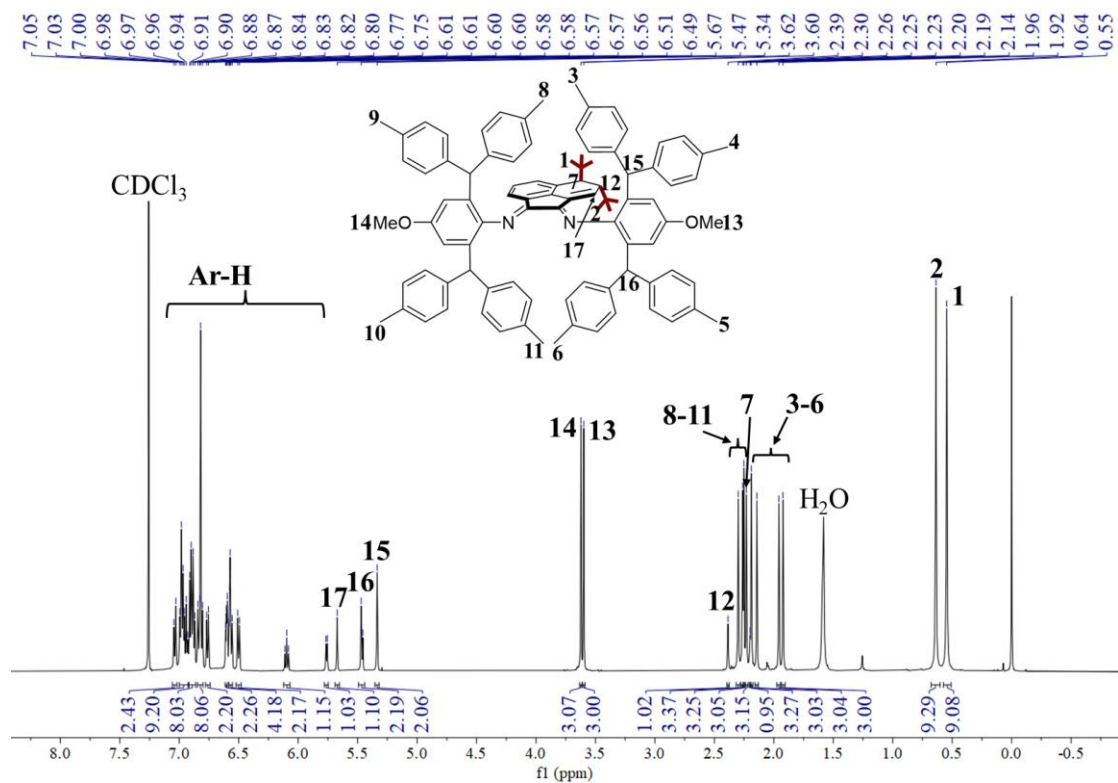

**Figure S4.**  $^1\text{H}$  NMR spectrum of L4 in  $\text{CDCl}_3$ .

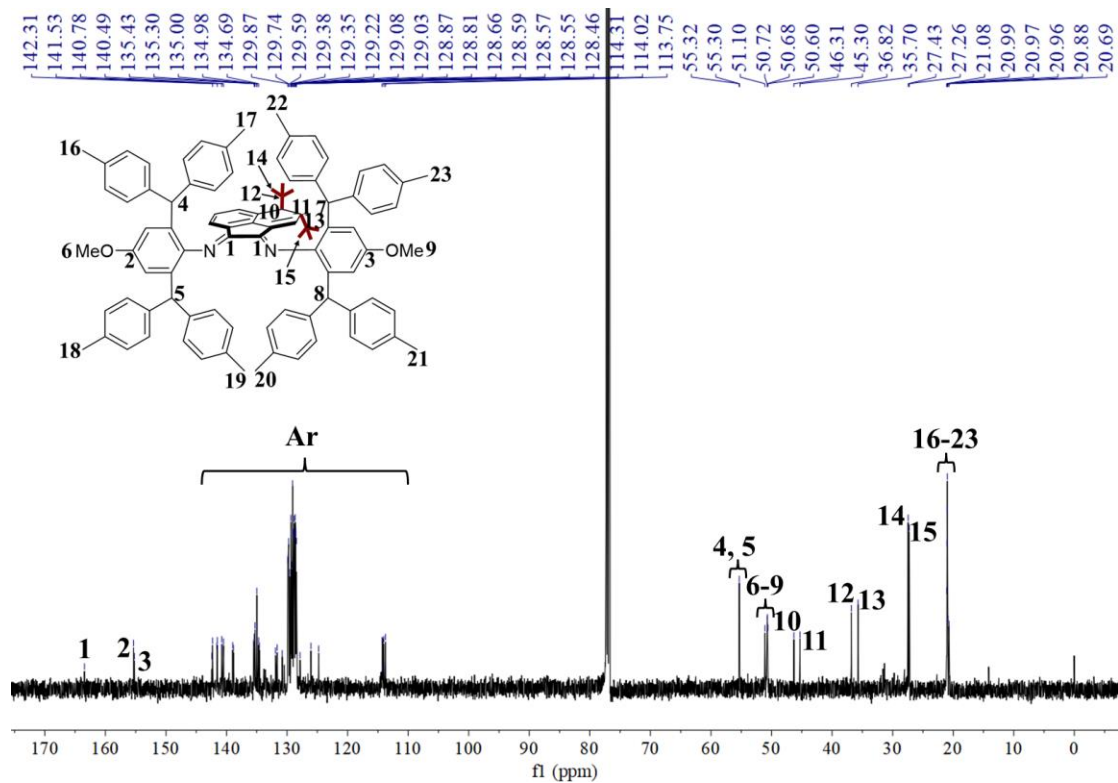

**Figure S5.**  $^{13}\text{C}$  NMR spectrum of L4 in  $\text{CDCl}_3$ .

### 3.2. $^1\text{H}$ and $^{13}\text{C}$ NMR of Palladium Complexes

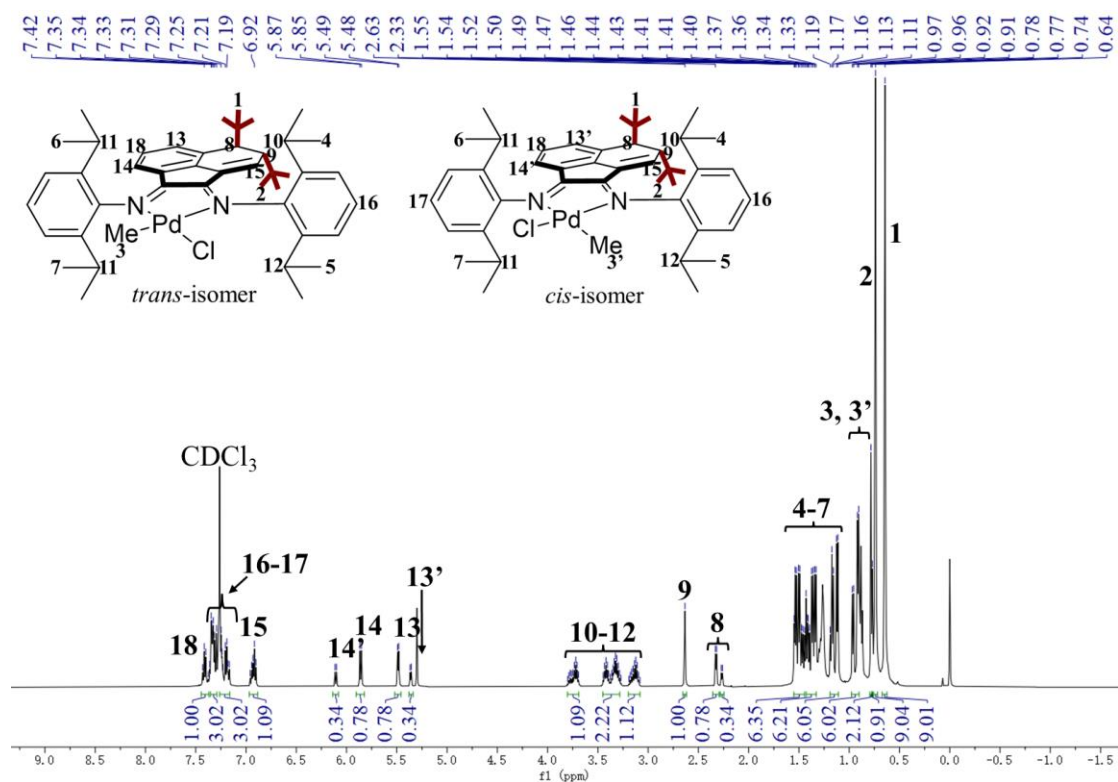

Figure S6.  $^1\text{H}$  NMR spectrum of Pd2 in  $\text{CDCl}_3$ .

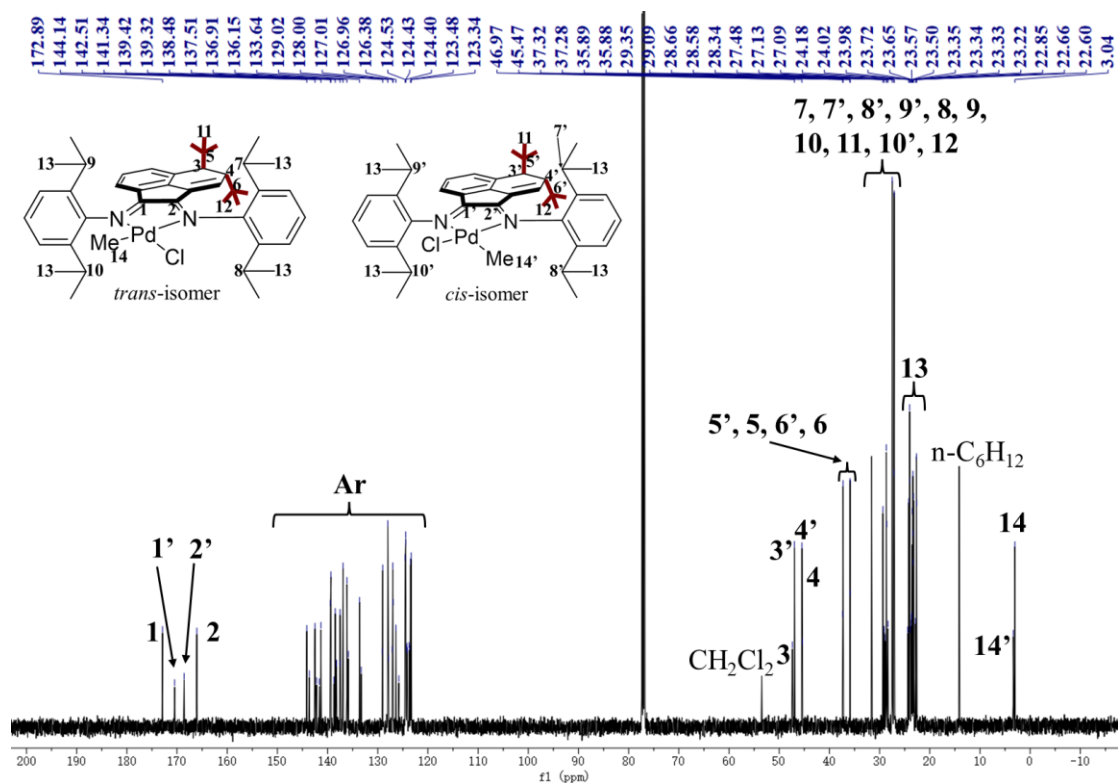

Figure S7.  $^{13}\text{C}$  NMR spectrum of Pd2 in  $\text{CDCl}_3$ .

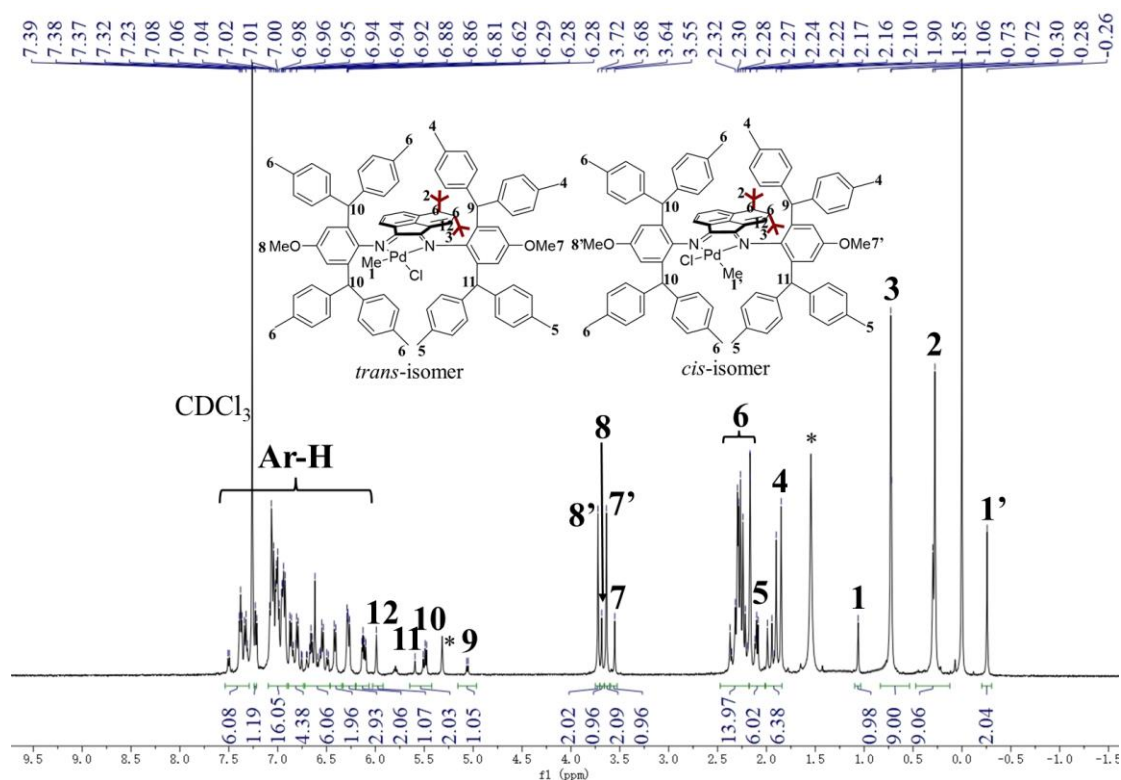

Figure S8.  $^1\text{H}$  NMR spectrum of Pd4 in  $\text{CDCl}_3$ . \*  $\text{CH}_2\text{Cl}_2$ ;  $\text{H}_2\text{O}$

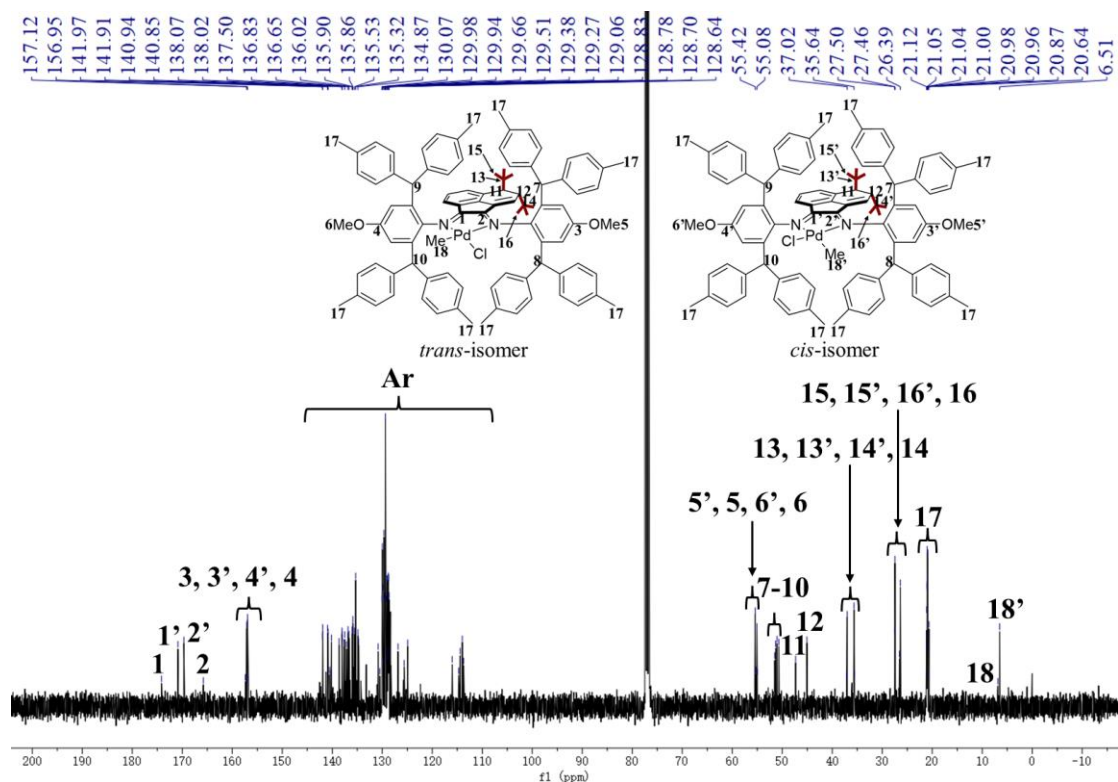

Figure S9.  $^{13}\text{C}$  NMR spectrum of Pd4 in  $\text{CDCl}_3$ .

### 3.3. ESI-MS Data

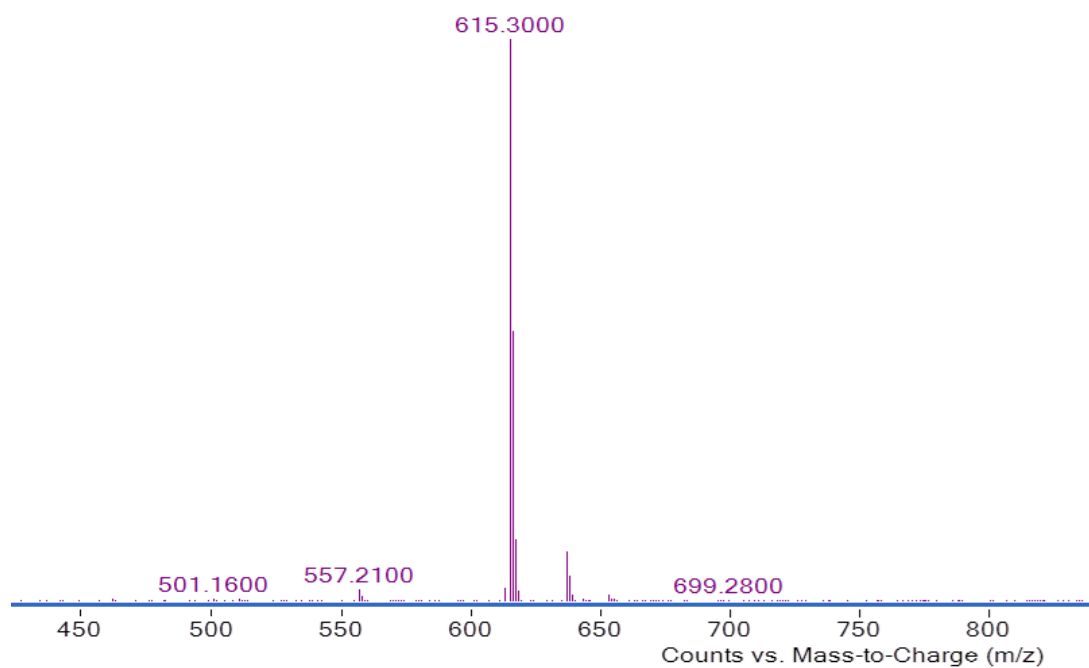

Figure S10. ESI-MS of L2.

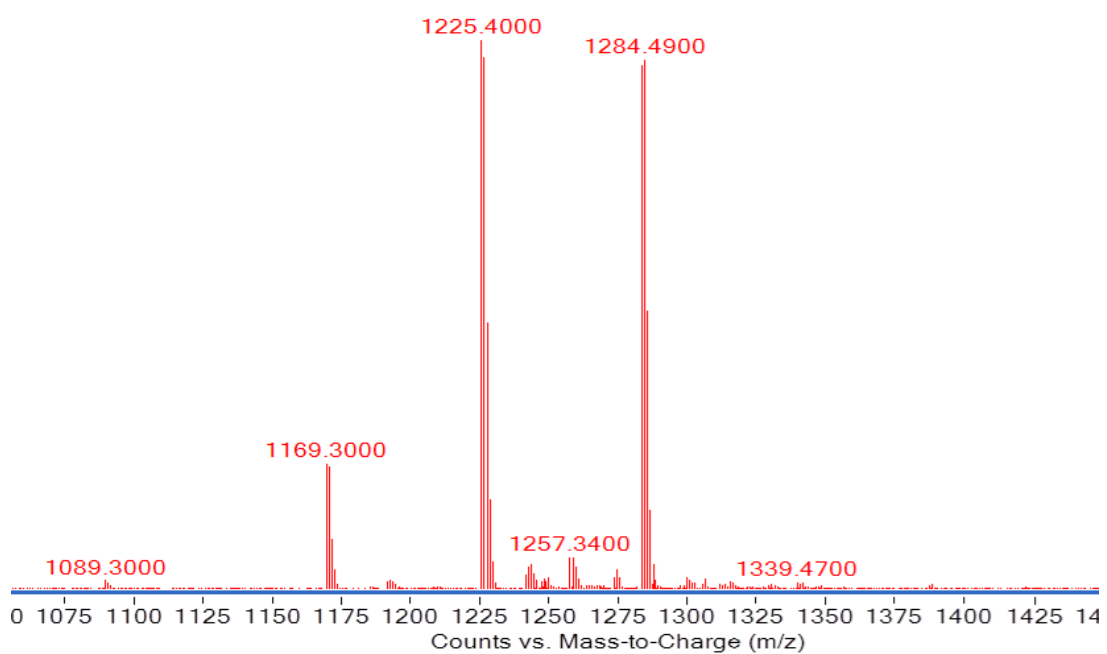

Figure S11. ESI-MS of L4.



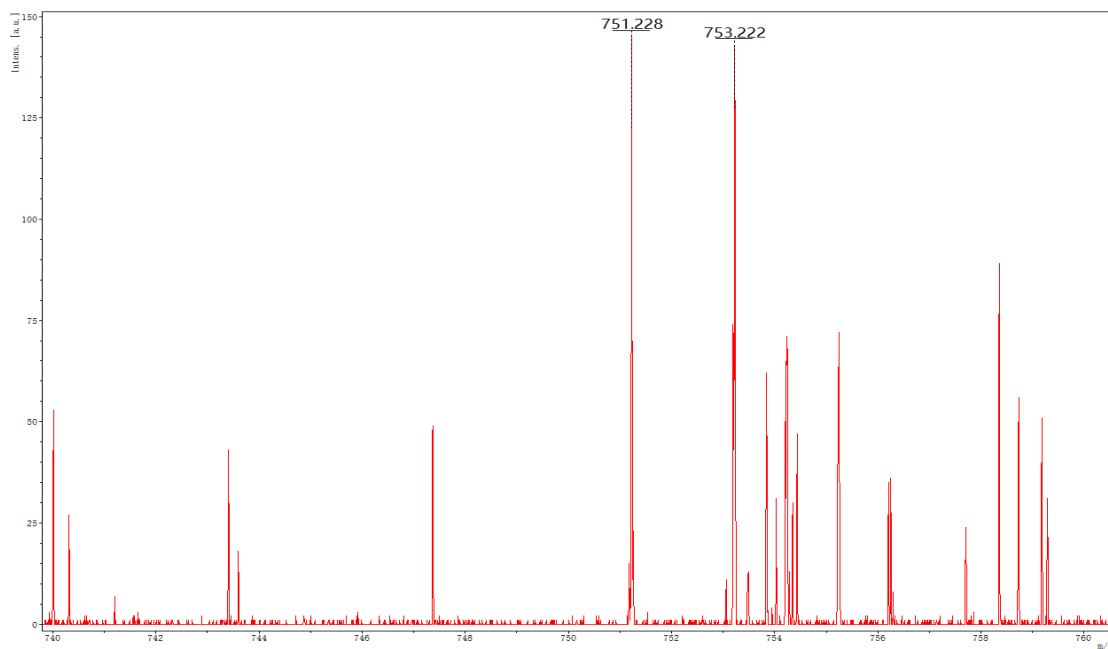

**Figure S12.** MALDI-TOF/TOF of Ni<sub>2</sub>.

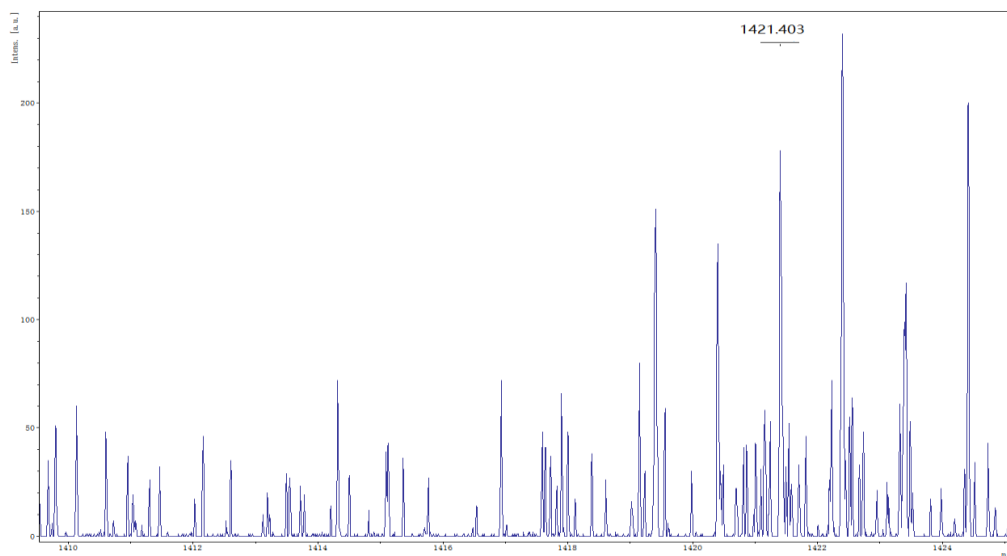

**Figure S13.** MALDI-TOF/TOF of Ni<sub>4</sub>.

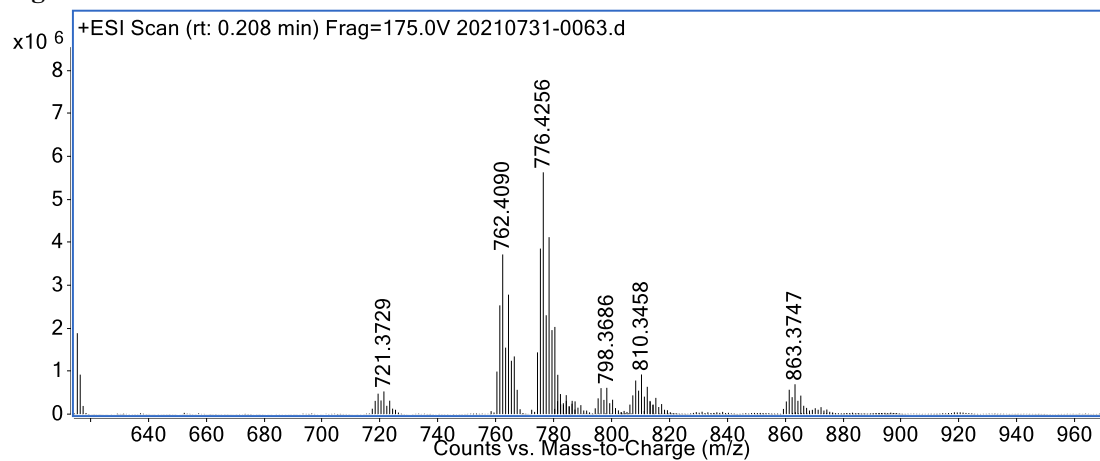

**Figure S14.** ESI-MS of Pd<sub>2</sub>.

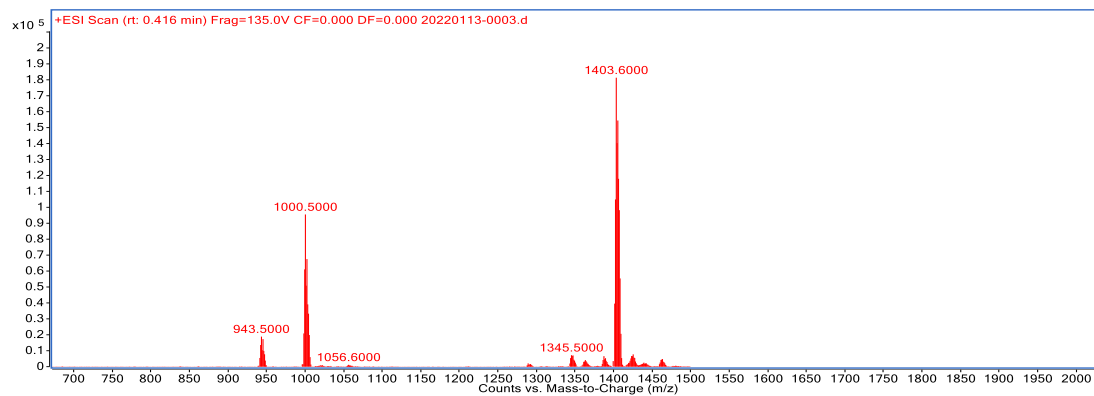

**Figure S15.** ESI-MS of Pd4.

### 3.4. $^1\text{H}$ and $^{13}\text{C}$ NMR of Polymers

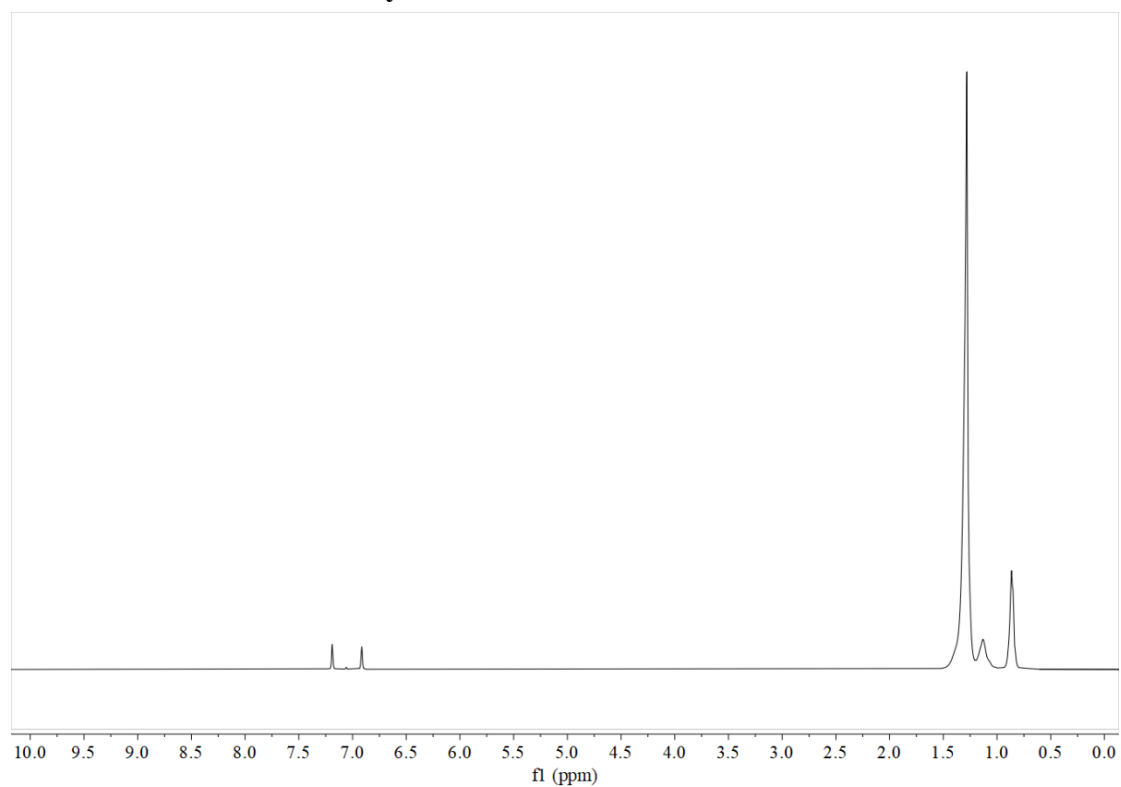

**Figure S16.**  $^1\text{H}$  NMR spectrum of the polymer from table 1, entry 1( $\text{C}_6\text{D}_4\text{Cl}_2$ ,  $120\text{ }^\circ\text{C}$ ).

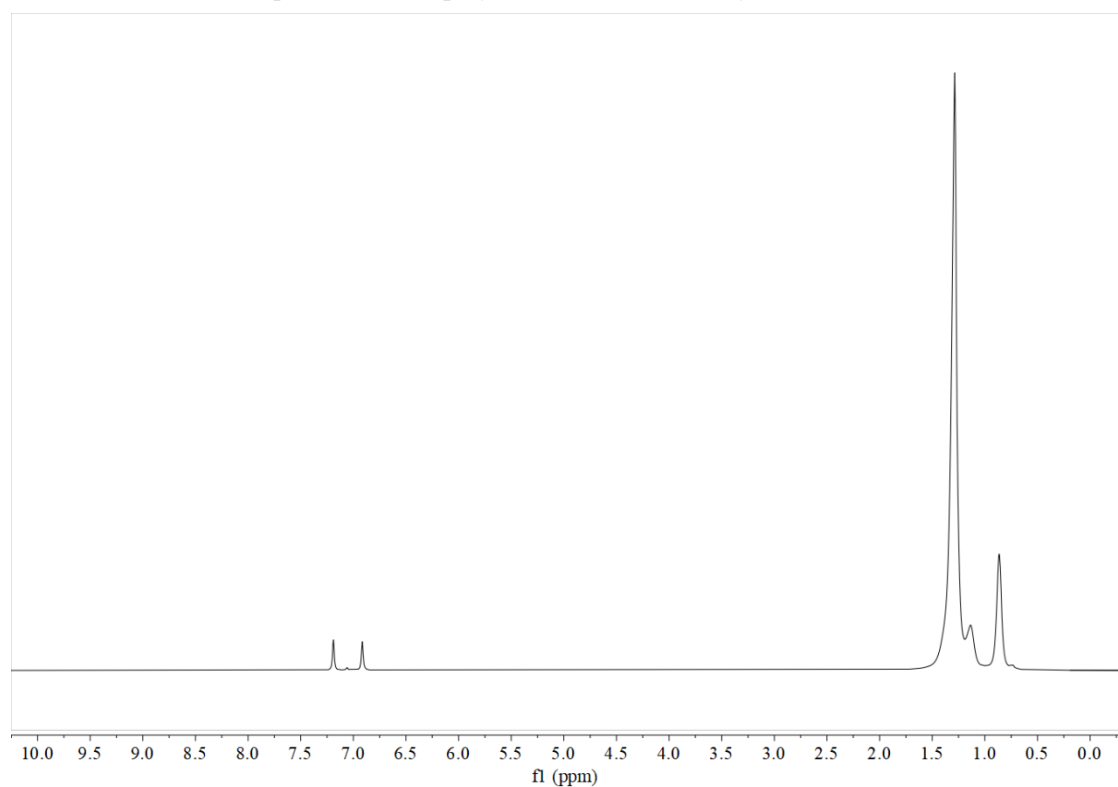

**Figure S17.**  $^1\text{H}$  NMR spectrum of the polymer from table 1, entry 2( $\text{C}_6\text{D}_4\text{Cl}_2$ ,  $120\text{ }^\circ\text{C}$ ).

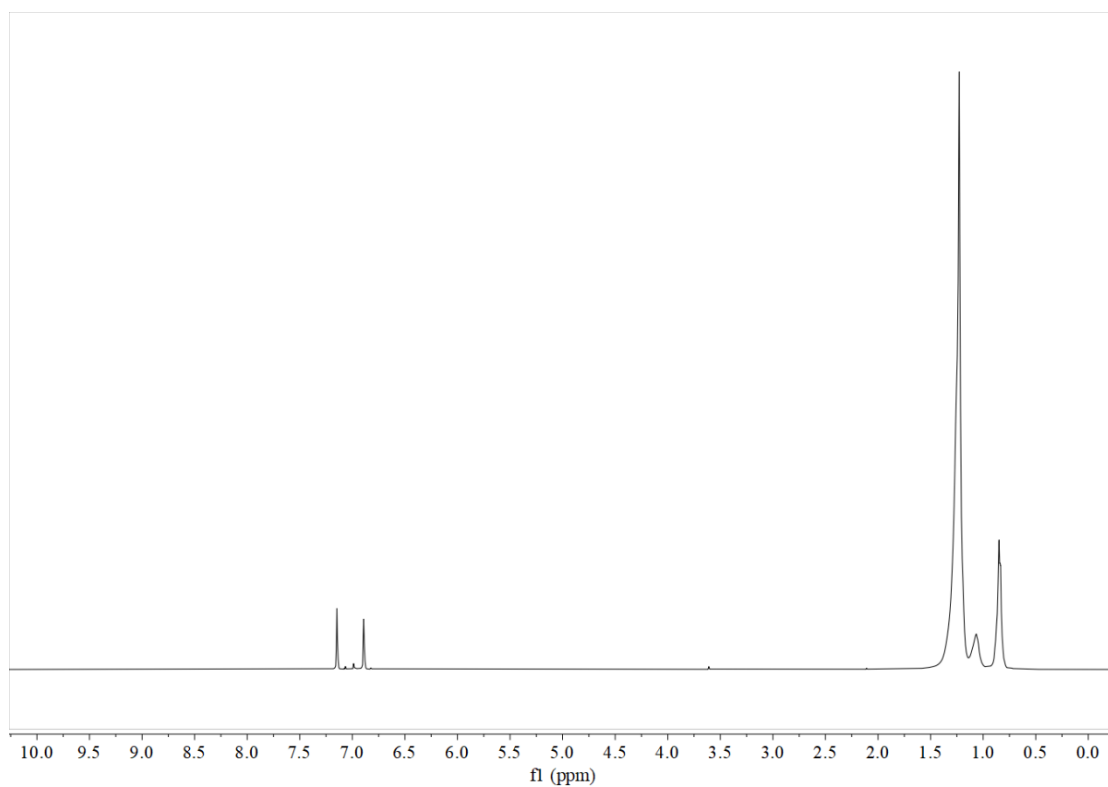

**Figure S18.**  $^1\text{H}$  NMR spectrum of the polymer from table 1, entry 3( $\text{C}_6\text{D}_4\text{Cl}_2$ , 120  $^\circ\text{C}$ ).

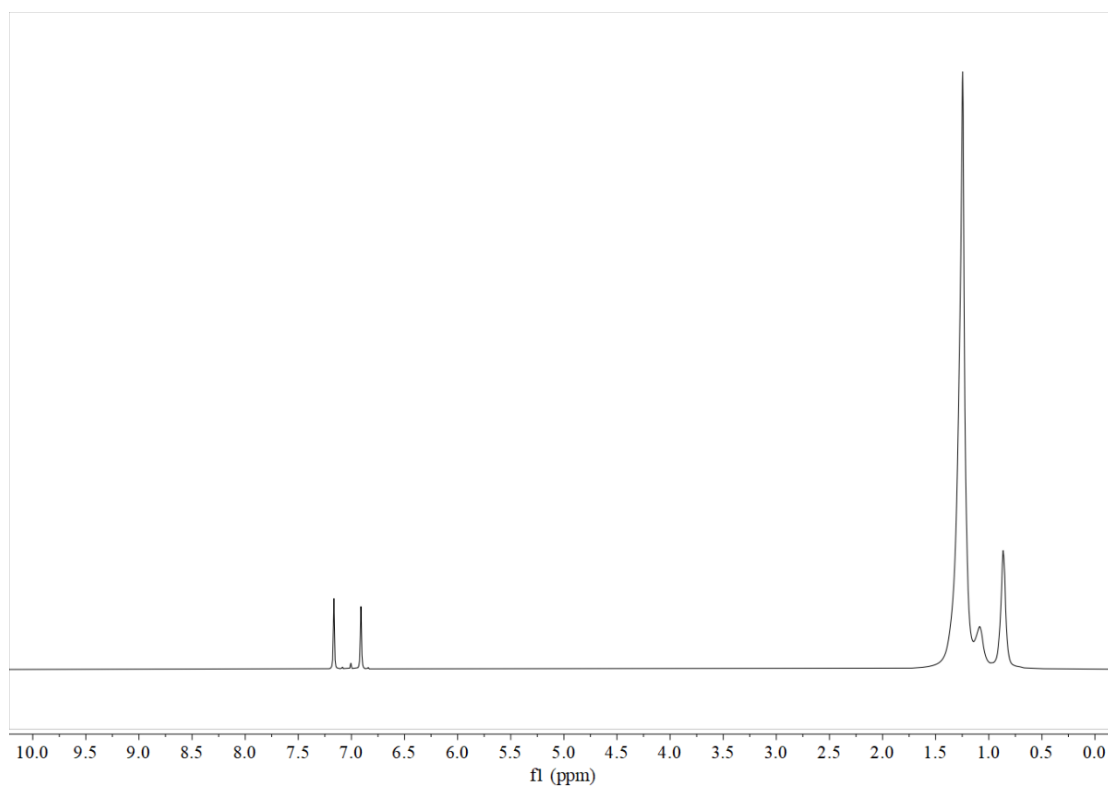

**Figure S19.**  $^1\text{H}$  NMR spectrum of the polymer from table 1, entry 4( $\text{C}_6\text{D}_4\text{Cl}_2$ , 120  $^\circ\text{C}$ ).

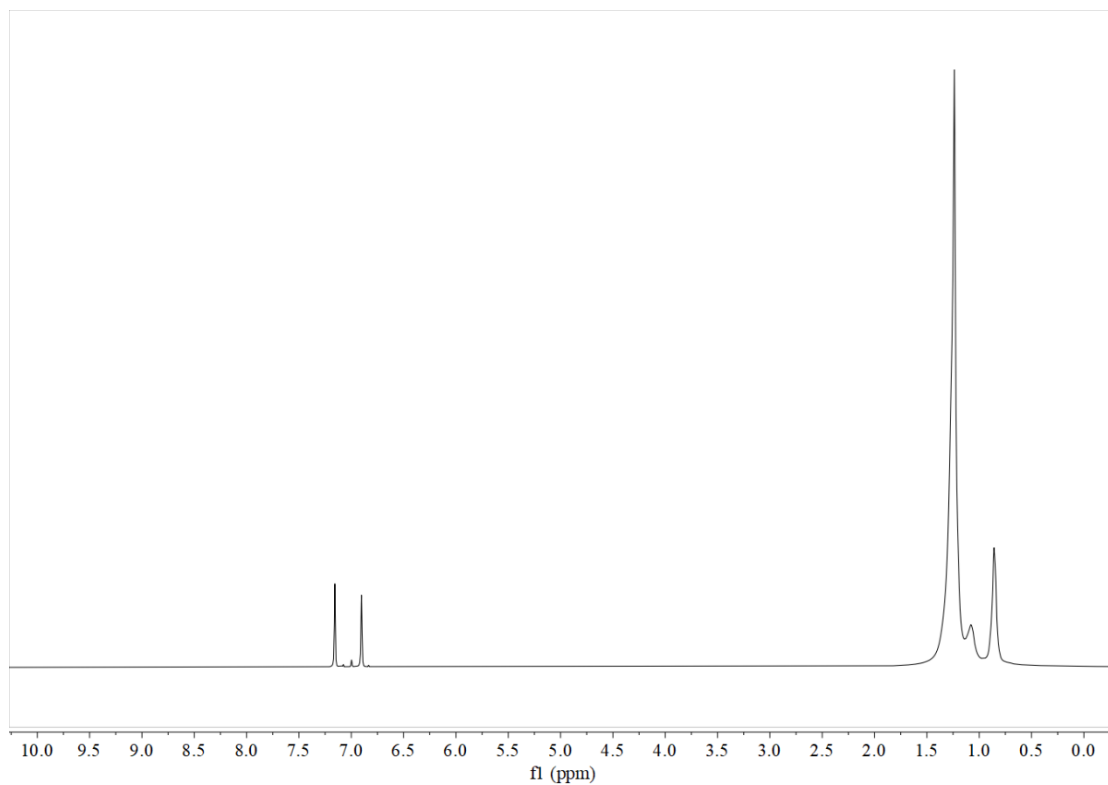

**Figure S20.** <sup>1</sup>H NMR spectrum of the polymer from table 1, entry 5(C<sub>6</sub>D<sub>4</sub>Cl<sub>2</sub>, 120 °C).

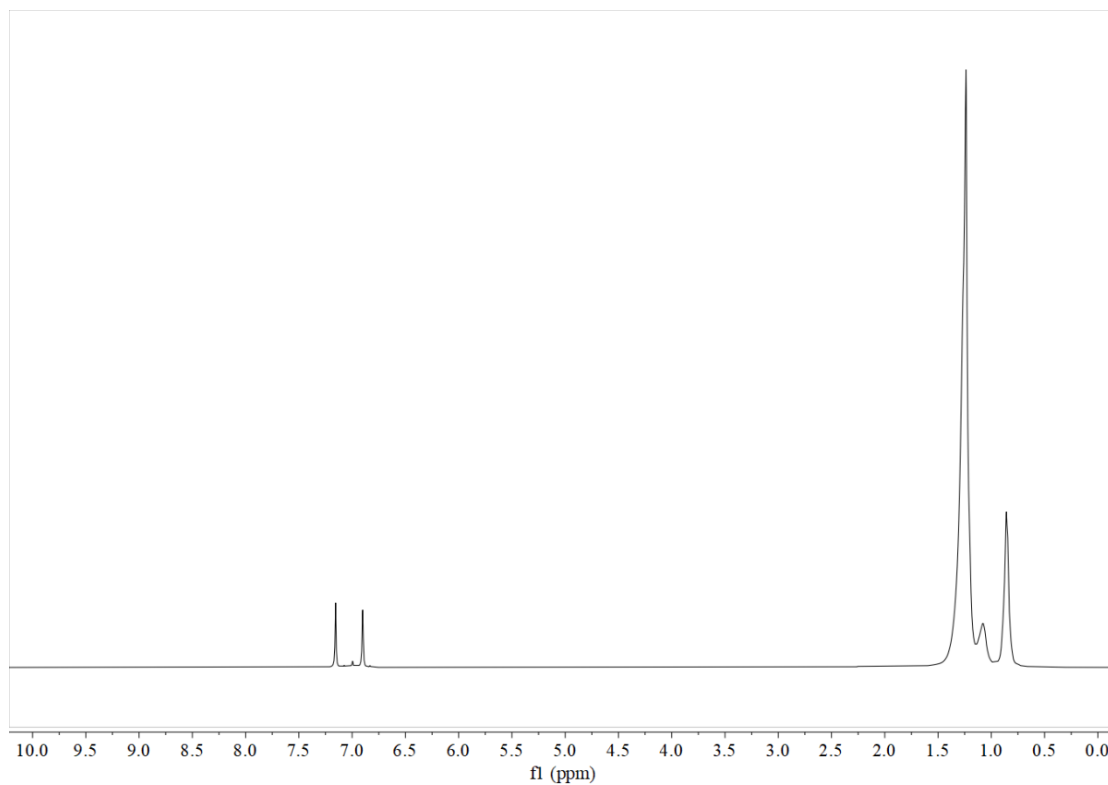

**Figure S21.** <sup>1</sup>H NMR spectrum of the polymer from table 1, entry 6(C<sub>6</sub>D<sub>4</sub>Cl<sub>2</sub>, 120 °C).

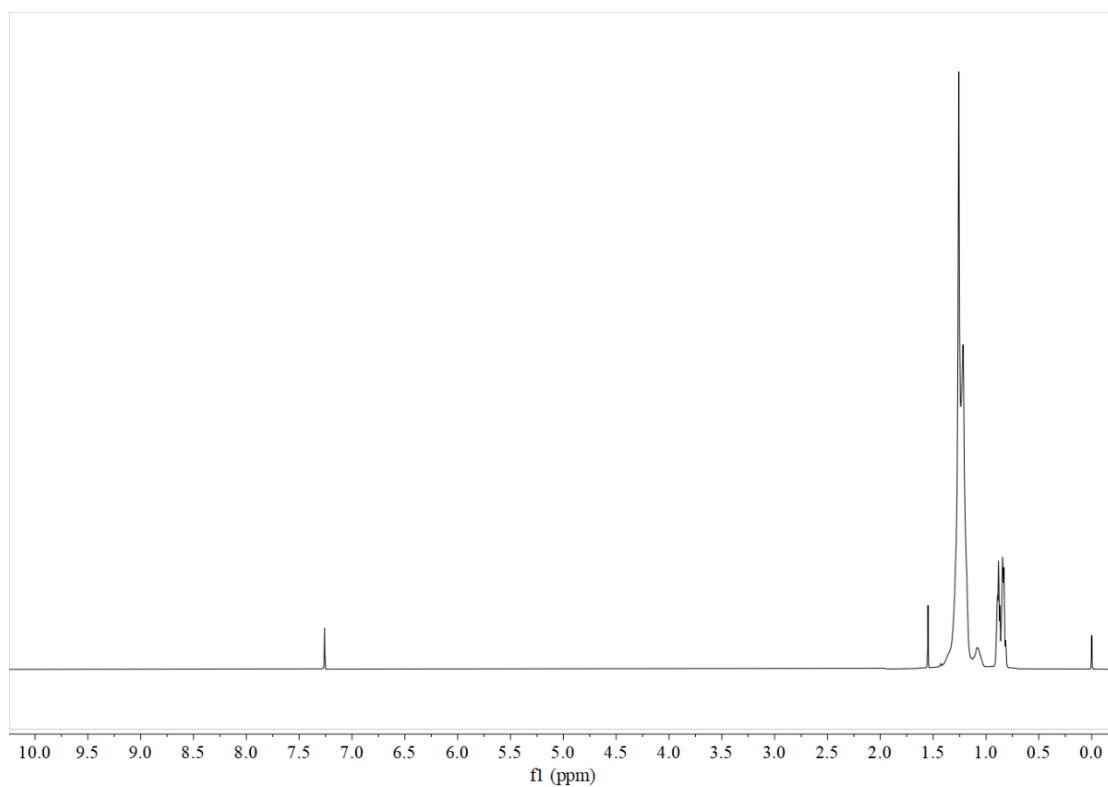

**Figure S22.**  $^1\text{H}$  NMR spectrum of the polymer from table 1, entry 10( $\text{CDCl}_3$ ,  $25^\circ\text{C}$ ).

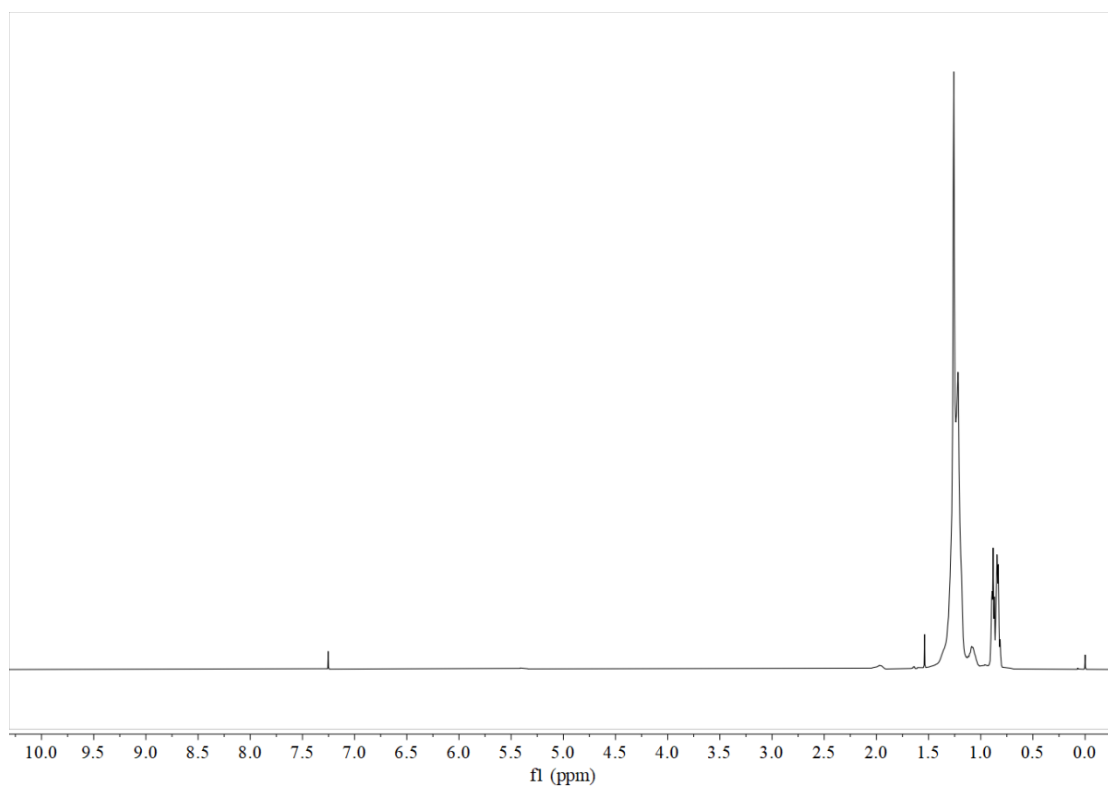

**Figure S23.**  $^1\text{H}$  NMR spectrum of the polymer from table 1, entry 11( $\text{CDCl}_3$ ,  $25^\circ\text{C}$ ).

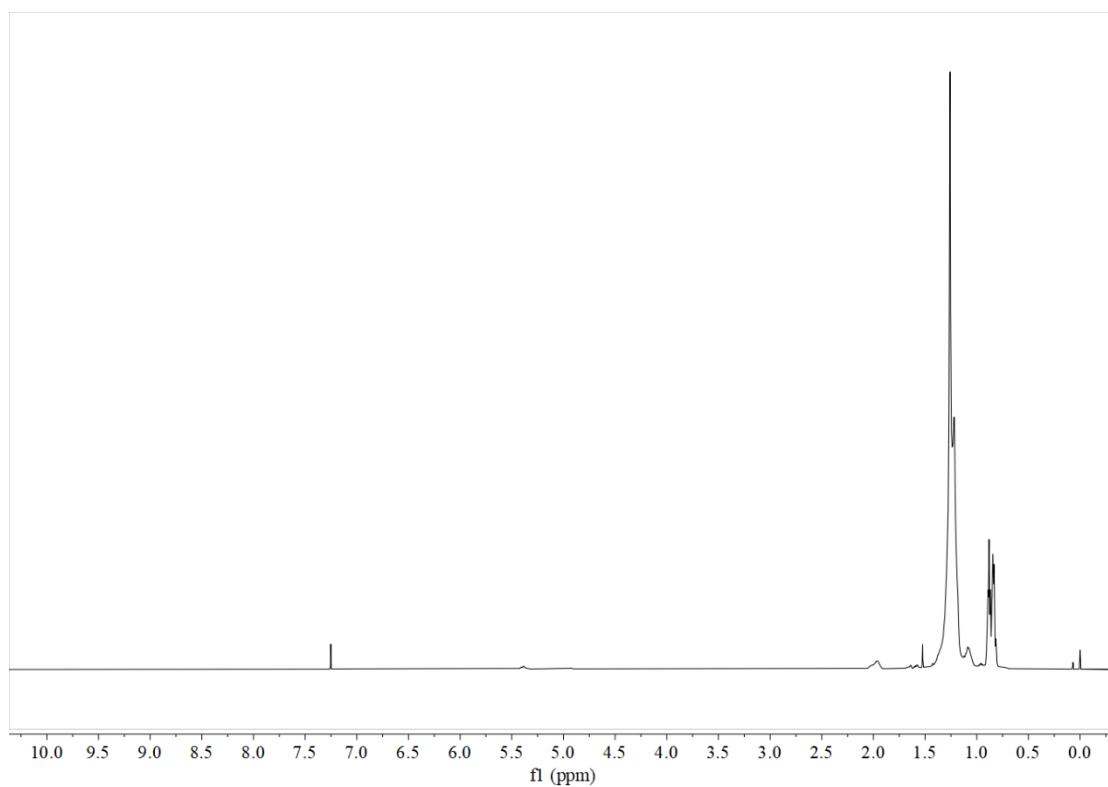

**Figure S24.**  $^1\text{H}$  NMR spectrum of the polymer from table 1, entry 12( $\text{CDCl}_3$ , 25  $^\circ\text{C}$ ).

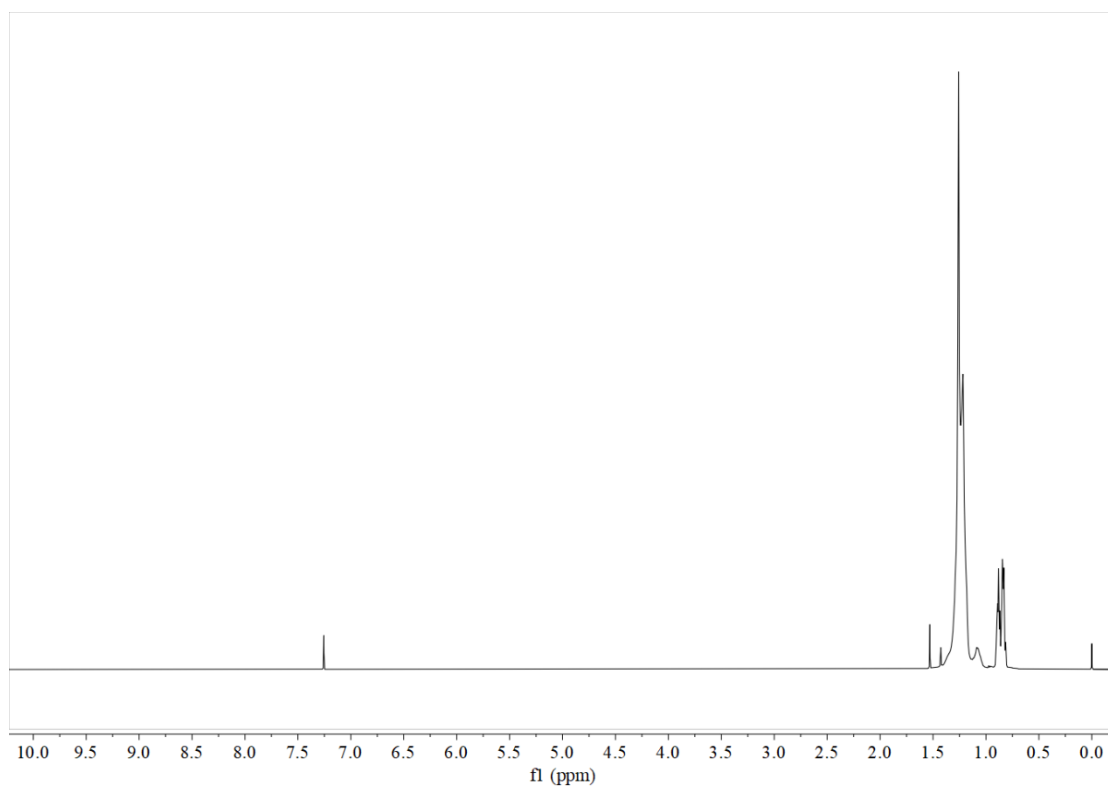

**Figure S25.**  $^1\text{H}$  NMR spectrum of the polymer from table 1, entry 13( $\text{CDCl}_3$ , 25  $^\circ\text{C}$ ).

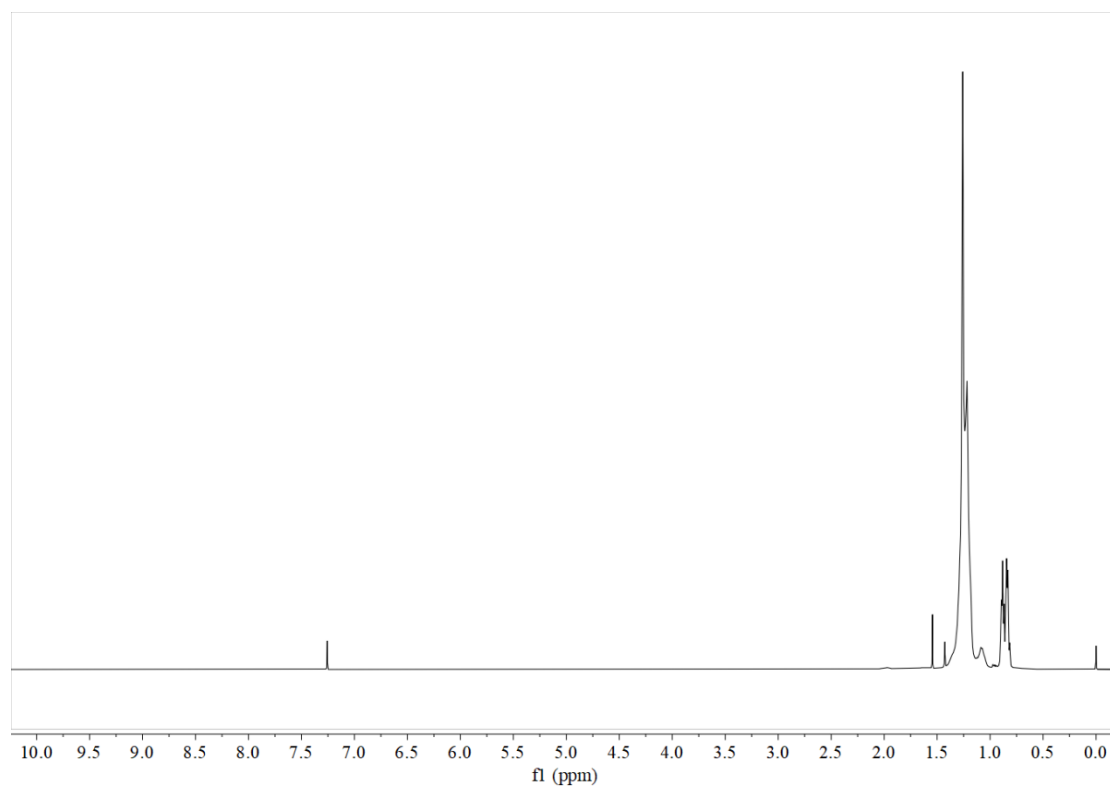

**Figure S26.**  $^1\text{H}$  NMR spectrum of the polymer from table 1, entry 14( $\text{CDCl}_3$ , 25  $^\circ\text{C}$ ).

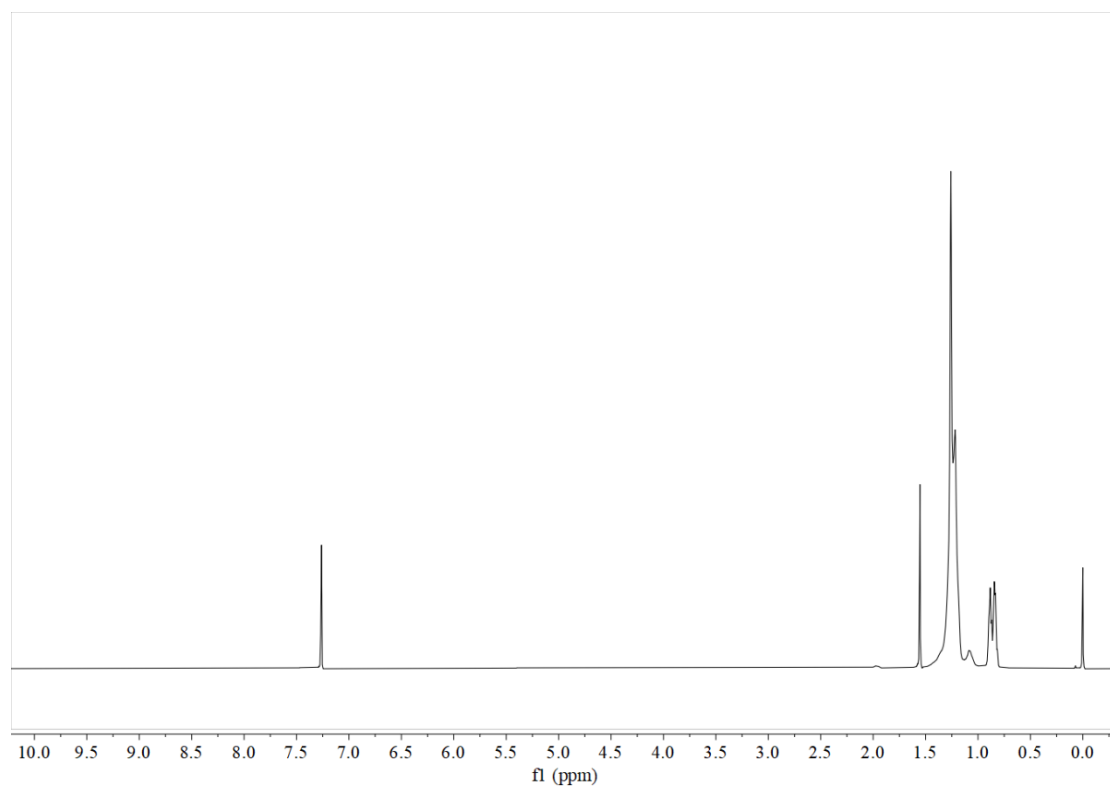

**Figure S27.**  $^1\text{H}$  NMR spectrum of the polymer from table 1, entry 15 ( $\text{CDCl}_3$ , 25  $^\circ\text{C}$ ).



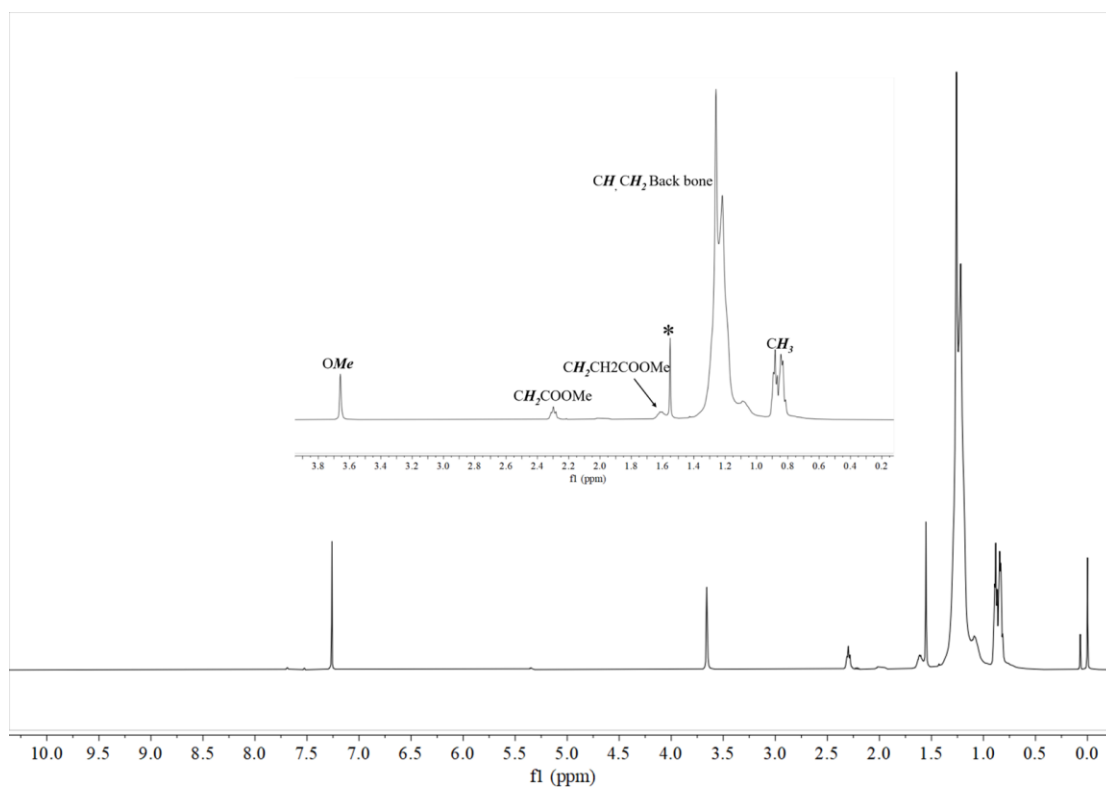

**Figure S28.**  $^1\text{H}$  NMR spectrum of the polymer from table 3, entry 2 ( $\text{CDCl}_3$ , 25  $^\circ\text{C}$ ). \*  $\text{H}_2\text{O}$

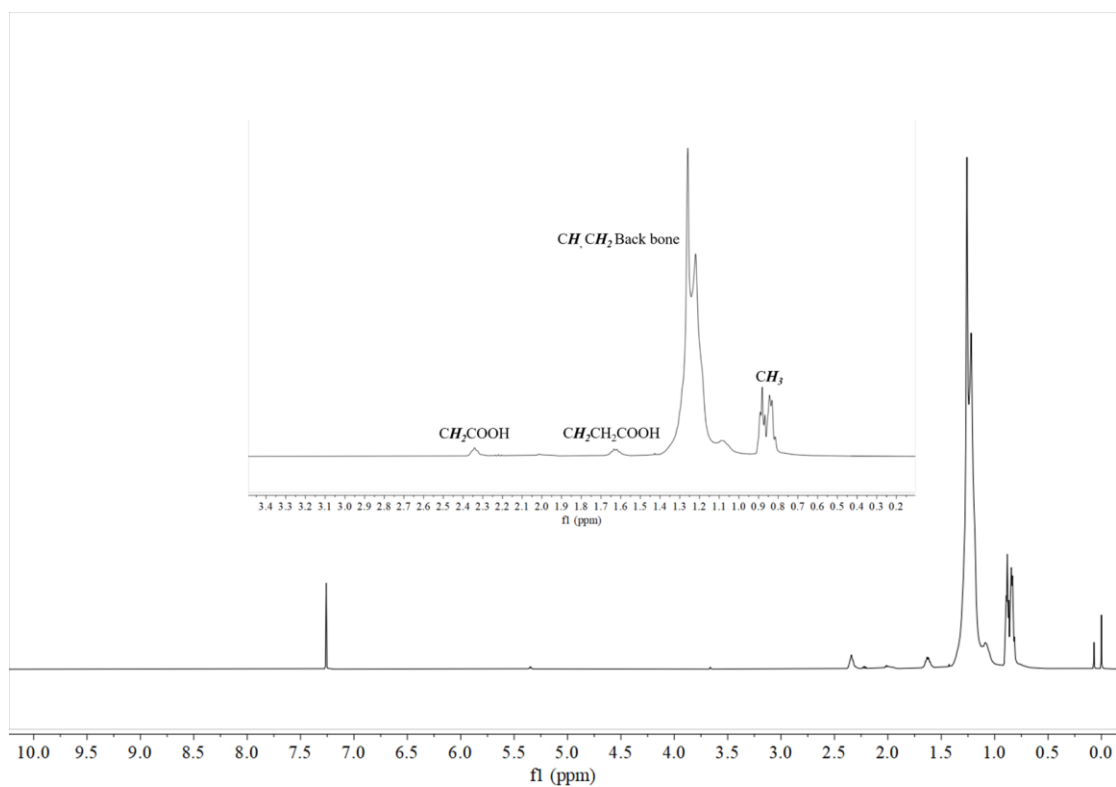

**Figure S29.**  $^1\text{H}$  NMR spectrum of the polymer from table 3, entry 4 ( $\text{CDCl}_3$ , 25  $^\circ\text{C}$ ).

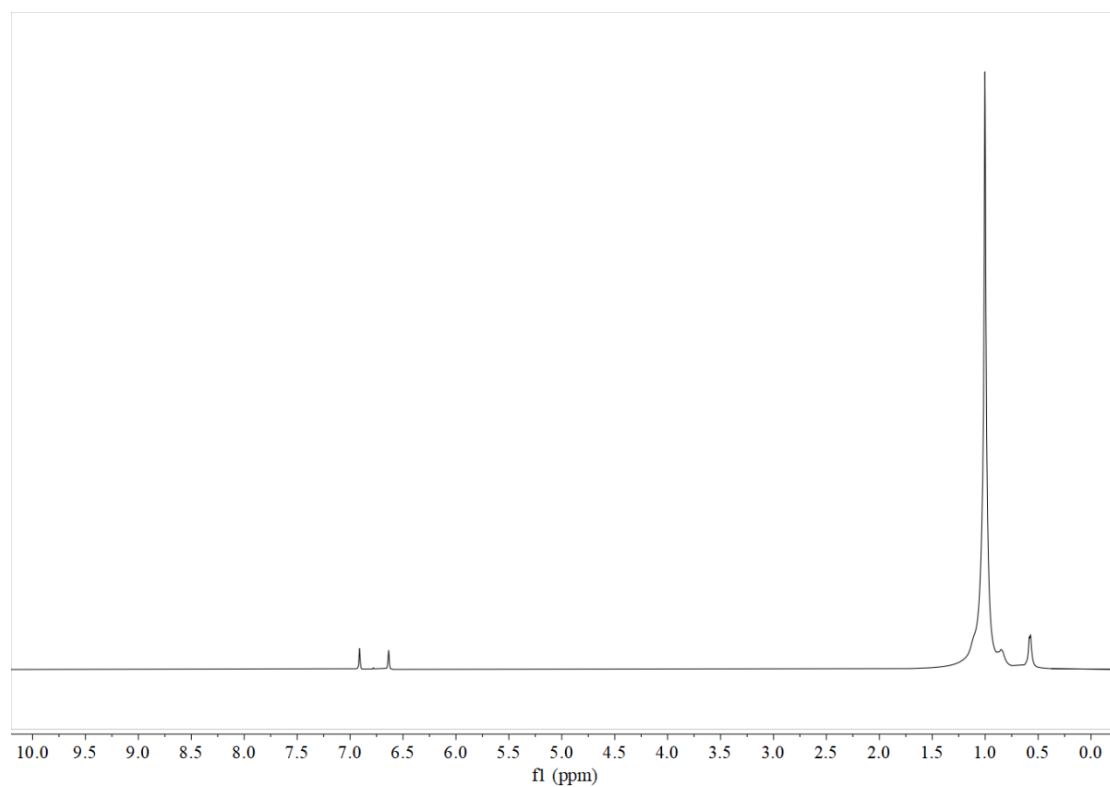

**Figure S30.**  $^1\text{H}$  NMR spectrum of the polymer from table 4, entry 1 ( $\text{C}_6\text{D}_4\text{Cl}_2$ ,  $120\text{ }^\circ\text{C}$ ).

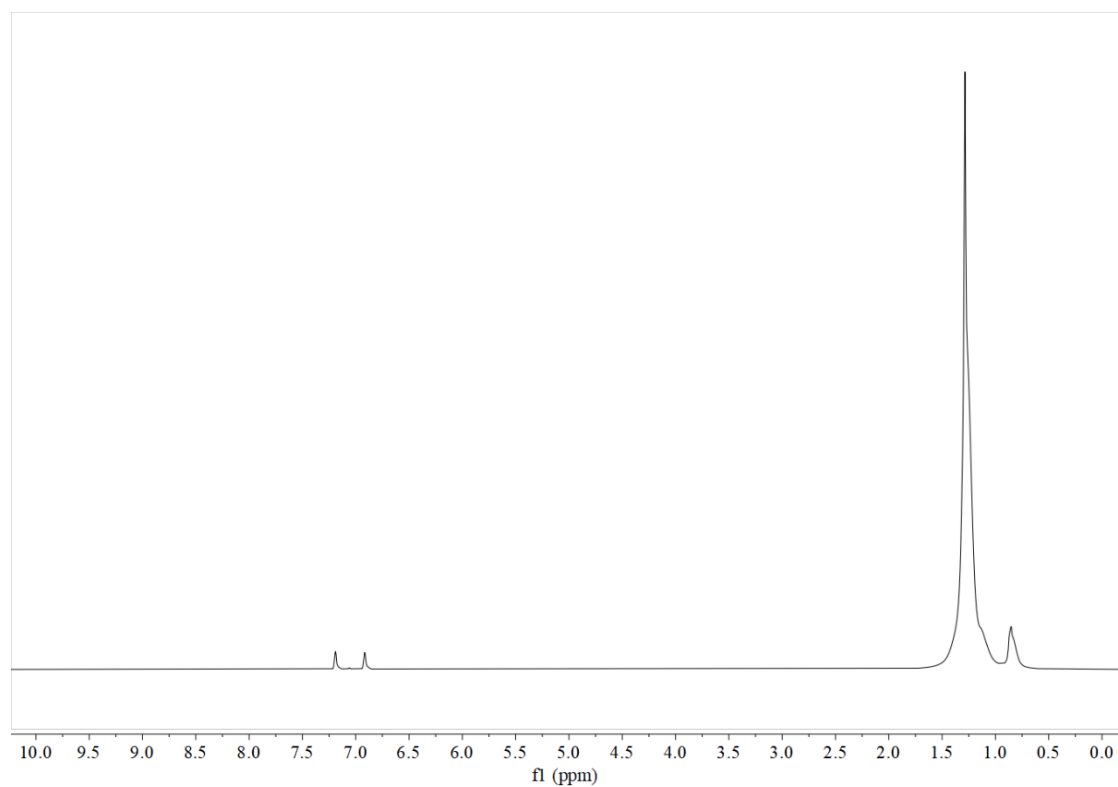

**Figure S31.**  $^1\text{H}$  NMR spectrum of the polymer from table 4, entry 2 ( $\text{C}_6\text{D}_4\text{Cl}_2$ ,  $120\text{ }^\circ\text{C}$ ).

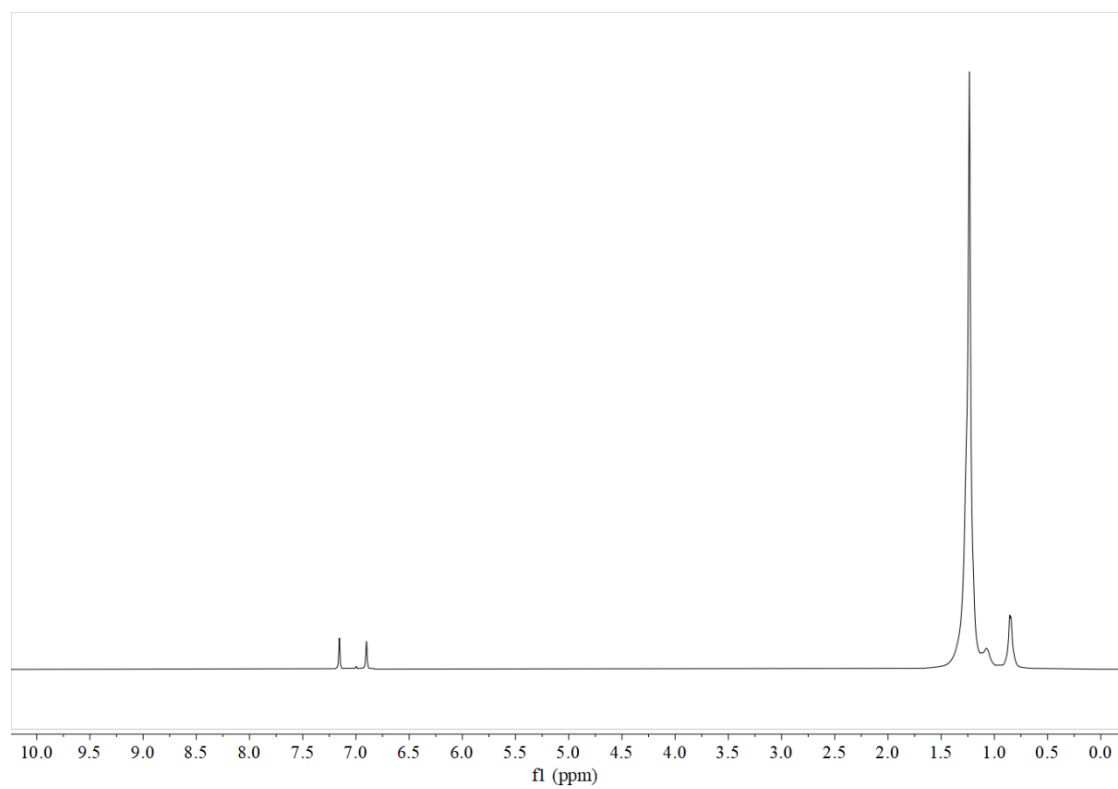

**Figure S32.**  $^1\text{H}$  NMR spectrum of the polymer from table 4, entry 3 ( $\text{C}_6\text{D}_4\text{Cl}_2$ ,  $120\text{ }^\circ\text{C}$ ).

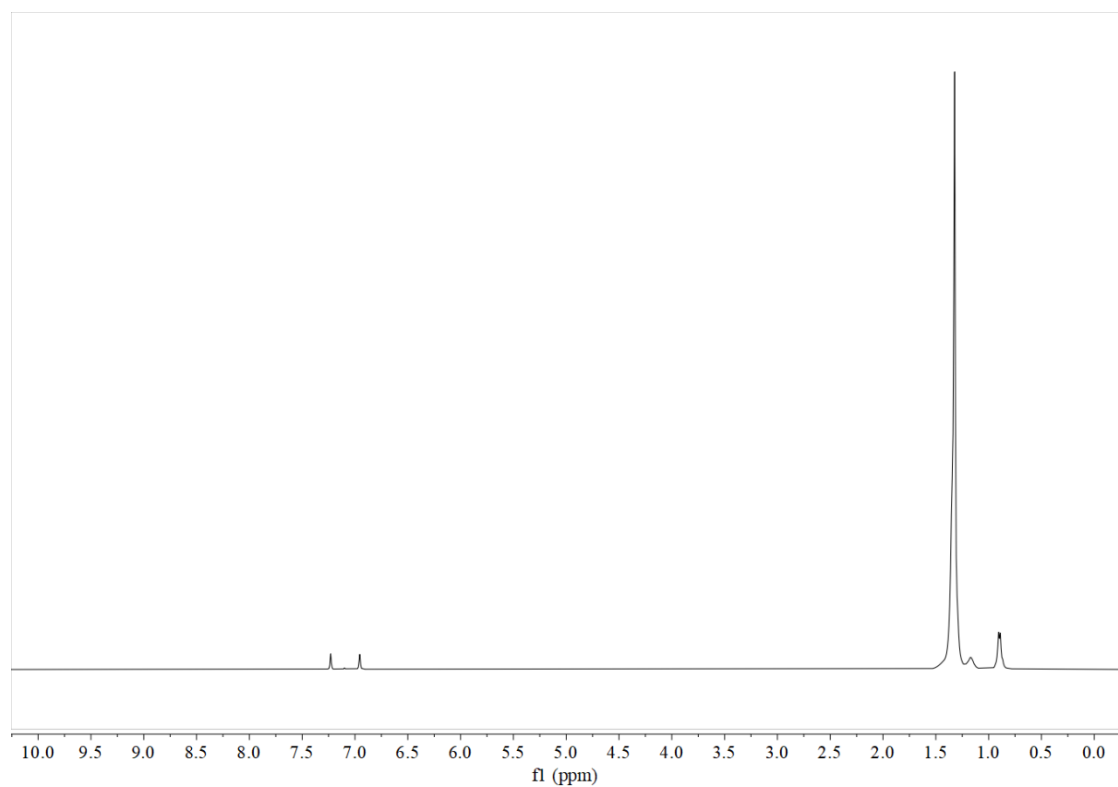

**Figure S33.**  $^1\text{H}$  NMR spectrum of the polymer from table 4, entry 4 ( $\text{C}_6\text{D}_4\text{Cl}_2$ ,  $120\text{ }^\circ\text{C}$ ).

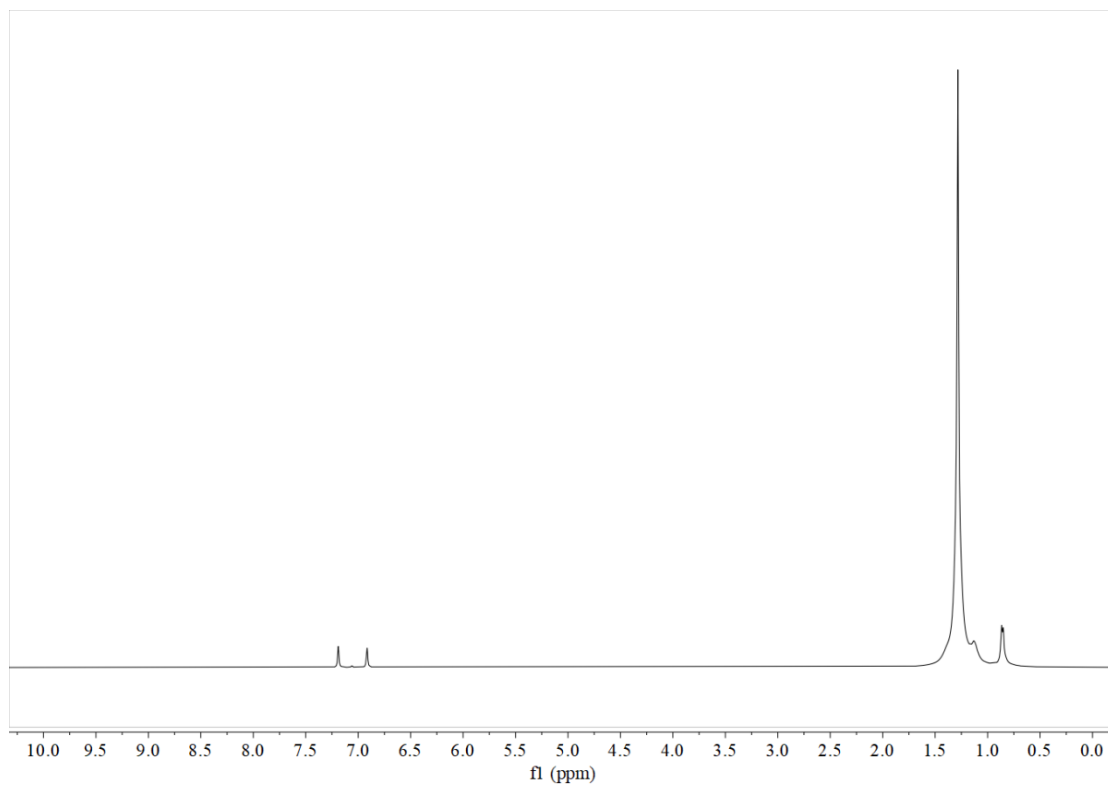

**Figure S34.**  $^1\text{H}$  NMR spectrum of the polymer from table 4, entry 5 ( $\text{C}_6\text{D}_4\text{Cl}_2$ ,  $120\text{ }^\circ\text{C}$ ).

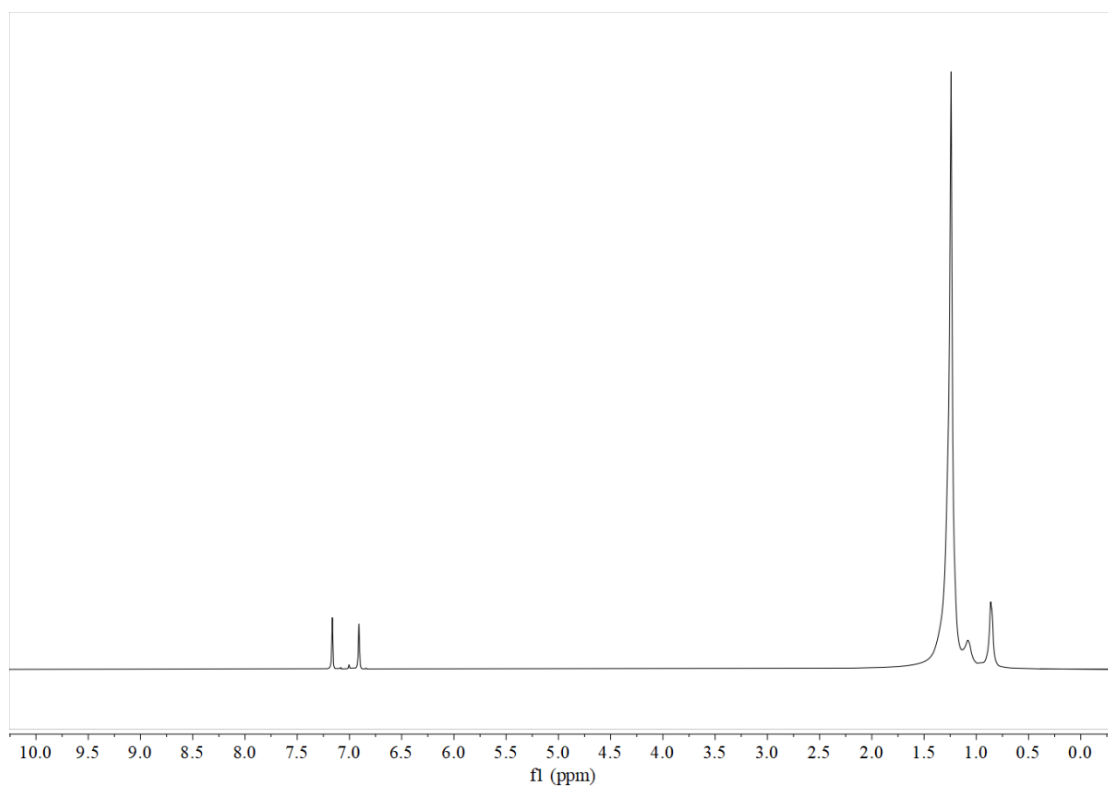

**Figure S35.**  $^1\text{H}$  NMR spectrum of the polymer from table 4, entry 6 ( $\text{C}_6\text{D}_4\text{Cl}_2$ ,  $120\text{ }^\circ\text{C}$ ).

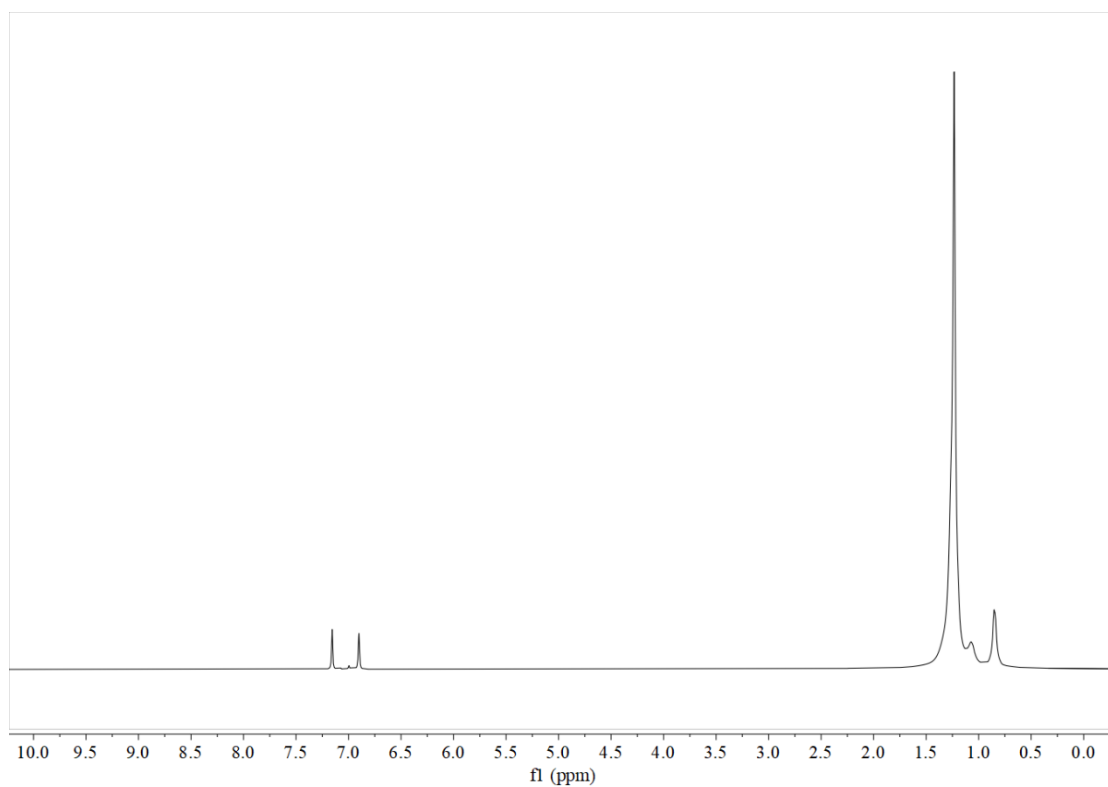

**Figure S36.**  $^1\text{H}$  NMR spectrum of the polymer from table 4, entry 7 ( $\text{C}_6\text{D}_4\text{Cl}_2$ ,  $120^\circ\text{C}$ ).

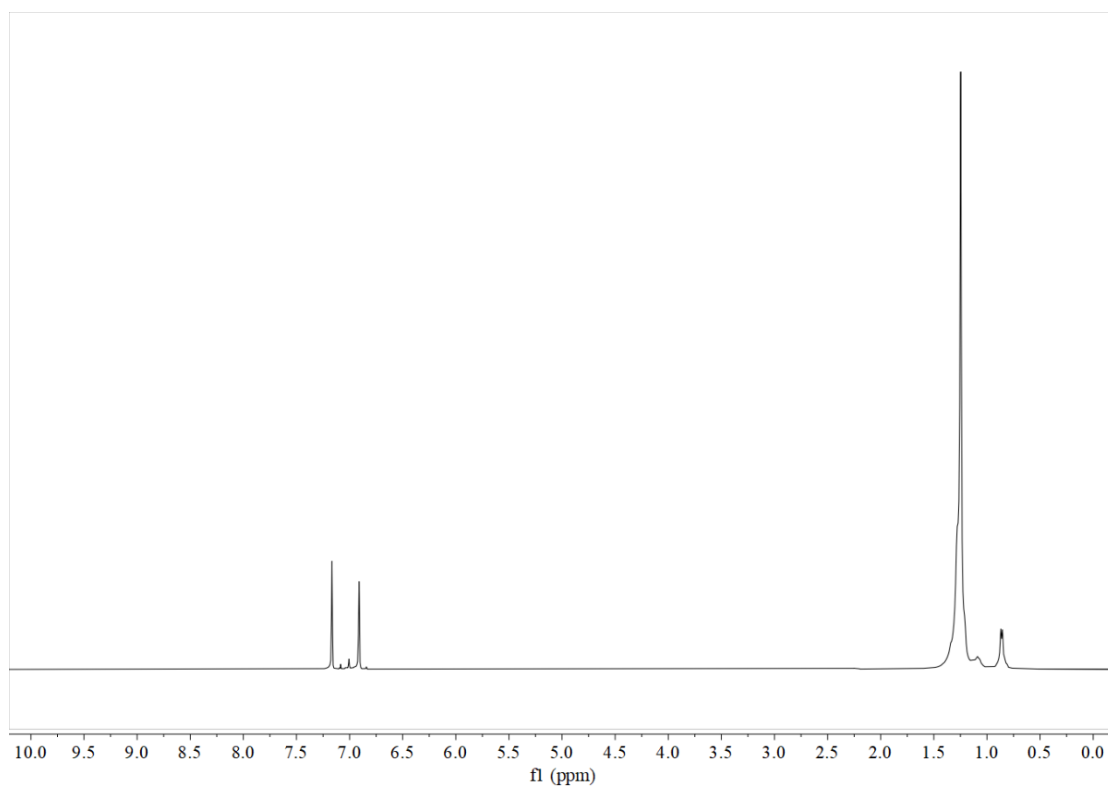

**Figure S37.**  $^1\text{H}$  NMR spectrum of the polymer from table 4, entry 8 ( $\text{C}_6\text{D}_4\text{Cl}_2$ ,  $120^\circ\text{C}$ ).

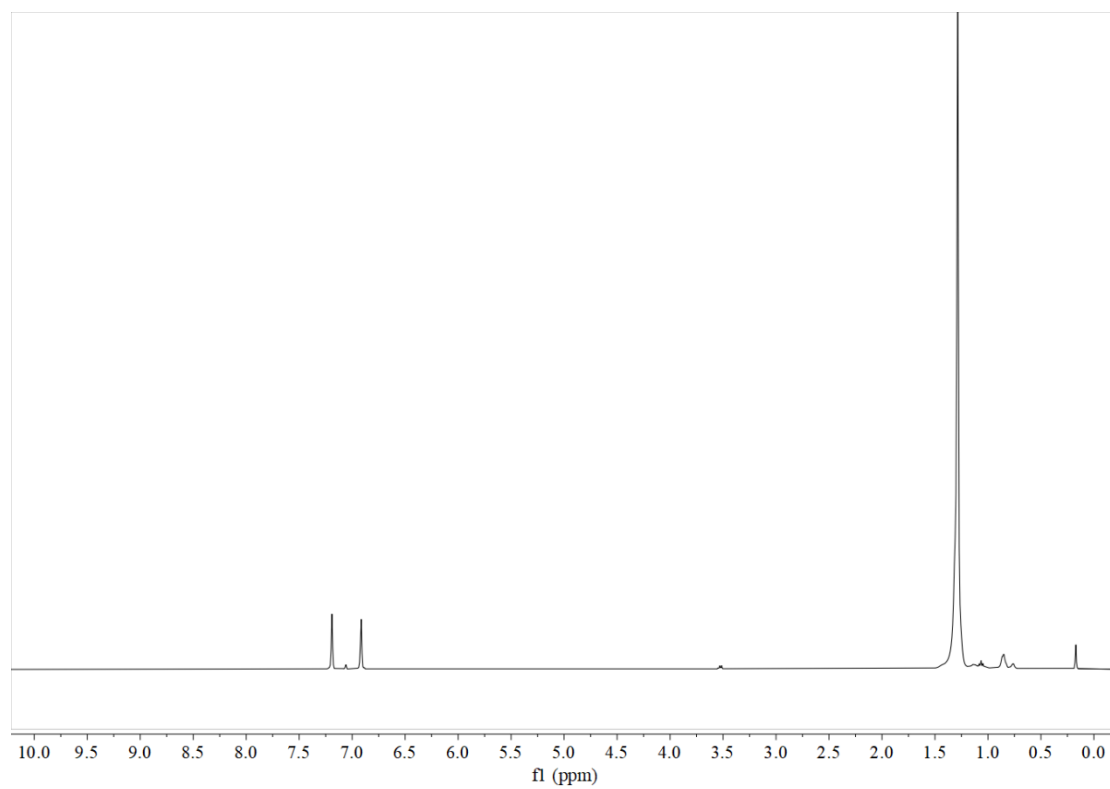

**Figure S38.**  $^1\text{H}$  NMR spectrum of the polymer from table 4, entry 9 ( $\text{C}_6\text{D}_4\text{Cl}_2$ ,  $120^\circ\text{C}$ ).

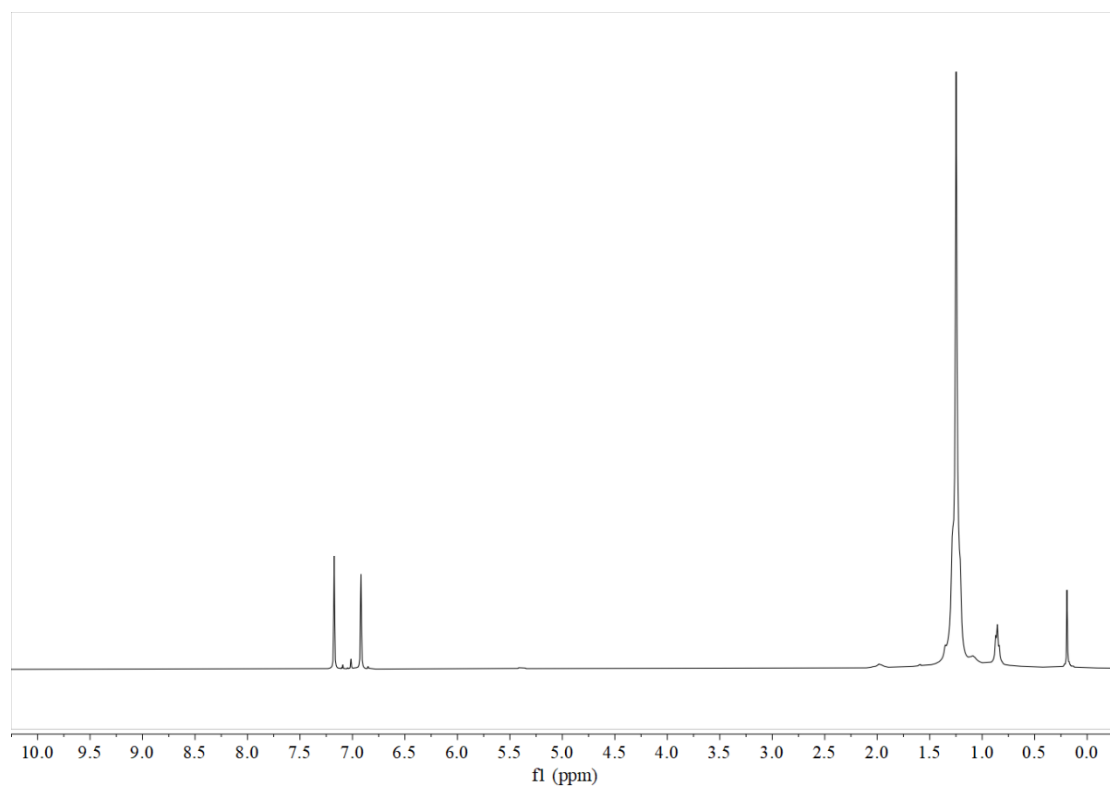

**Figure S39.**  $^1\text{H}$  NMR spectrum of the polymer from table 4, entry 10 ( $\text{C}_6\text{D}_4\text{Cl}_2$ ,  $120^\circ\text{C}$ ).

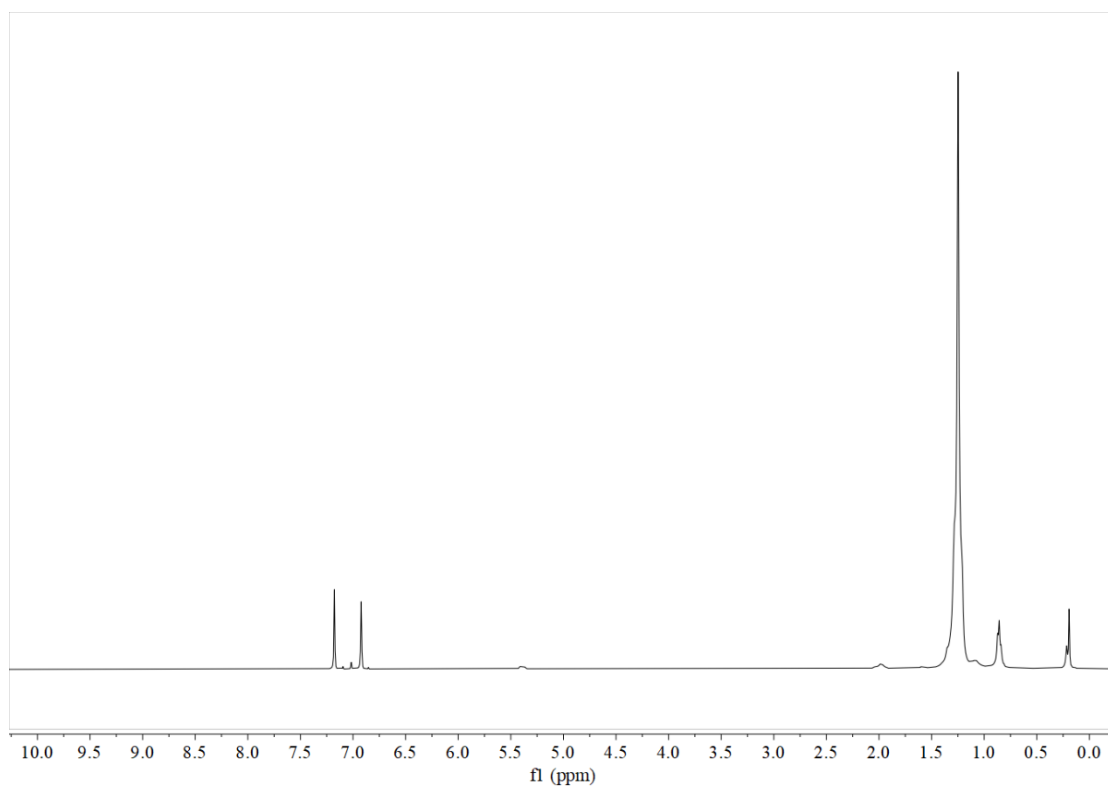

**Figure S40.** <sup>1</sup>H NMR spectrum of the polymer from table 4, entry 11 (C<sub>6</sub>D<sub>4</sub>Cl<sub>2</sub>, 120 °C).

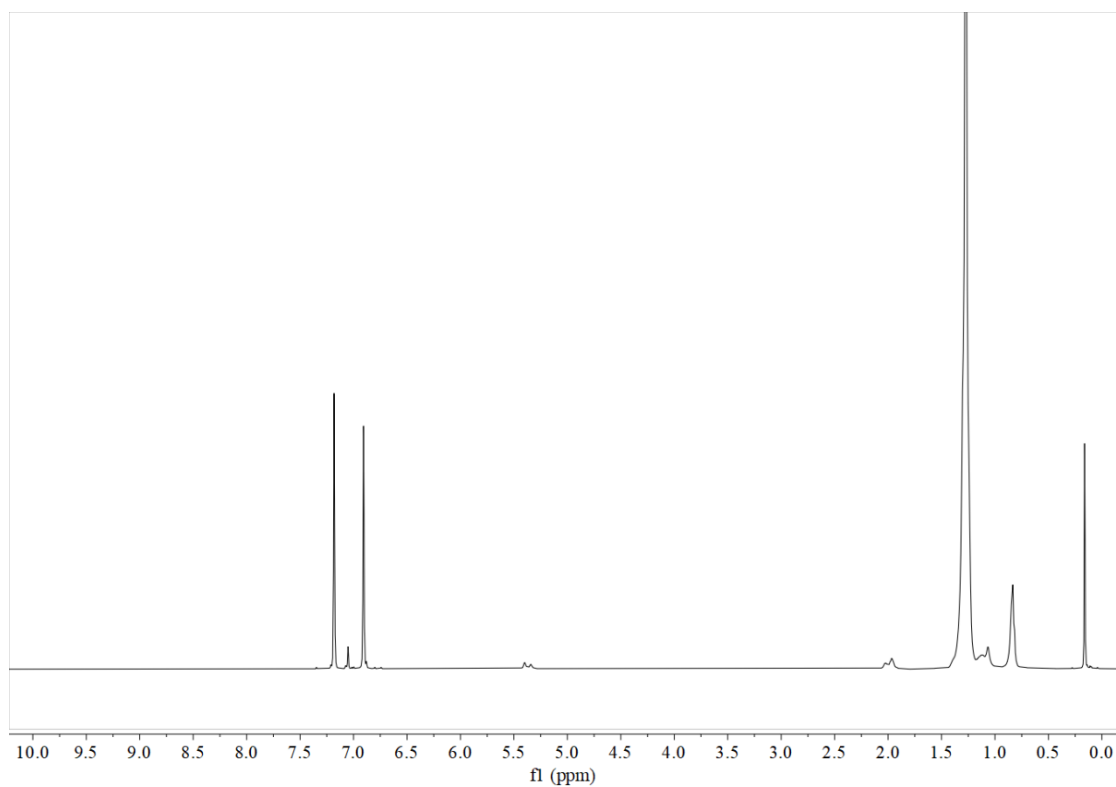

**Figure S41.** <sup>1</sup>H NMR spectrum of the polymer from table 4, entry 12 (C<sub>6</sub>D<sub>4</sub>Cl<sub>2</sub>, 120 °C).

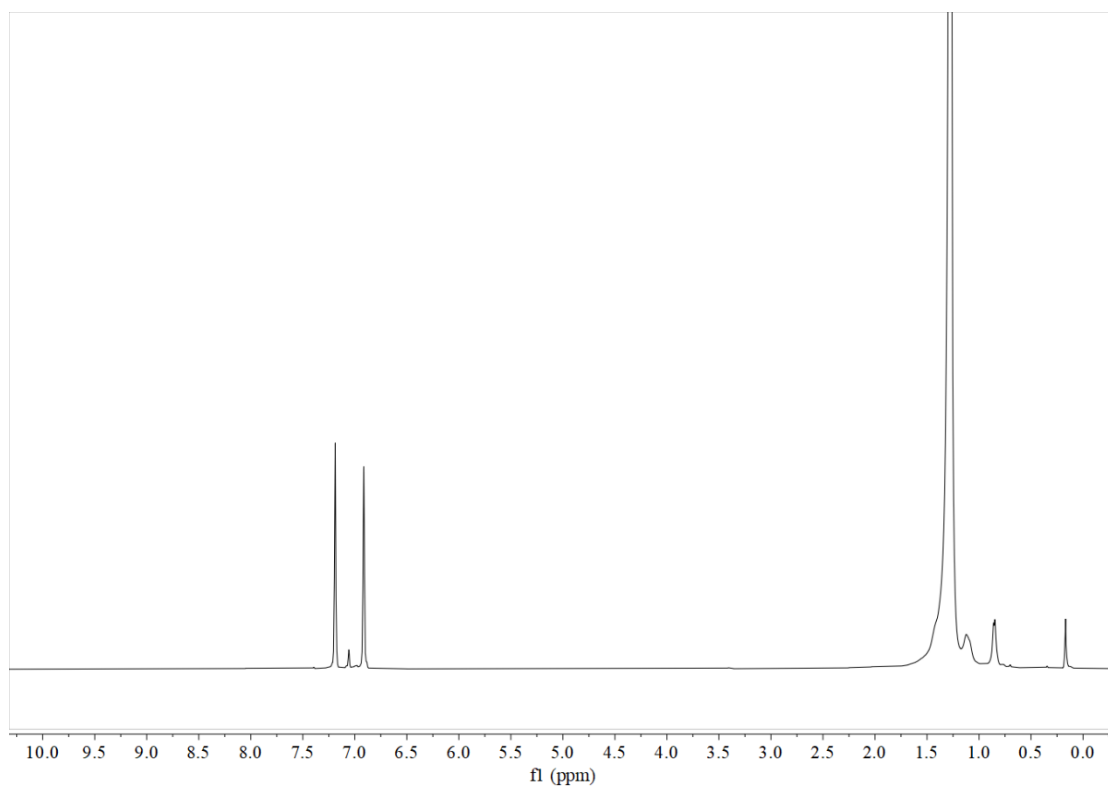

**Figure S42.**  $^1\text{H}$  NMR spectrum of the polymer from table 4, entry 13 ( $\text{C}_6\text{D}_4\text{Cl}_2$ , 120  $^\circ\text{C}$ ).

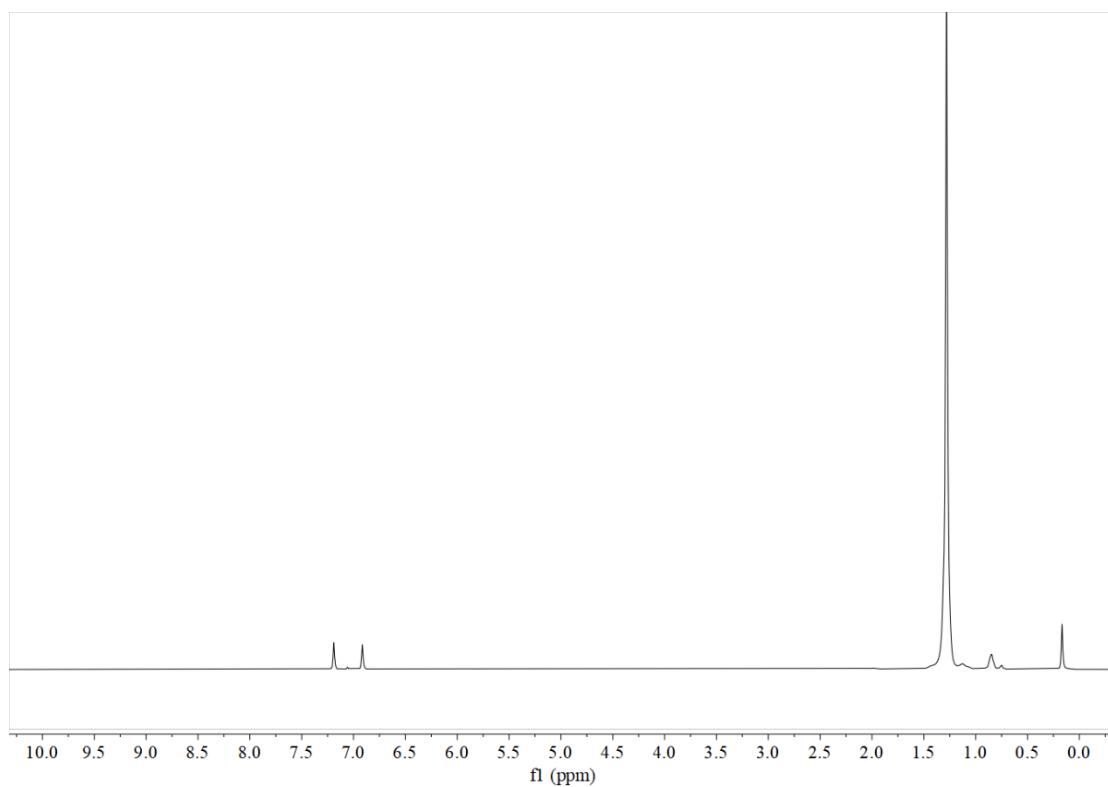

**Figure S43.**  $^1\text{H}$  NMR spectrum of the polymer from table 4, entry 14 ( $\text{C}_6\text{D}_4\text{Cl}_2$ , 120  $^\circ\text{C}$ ).



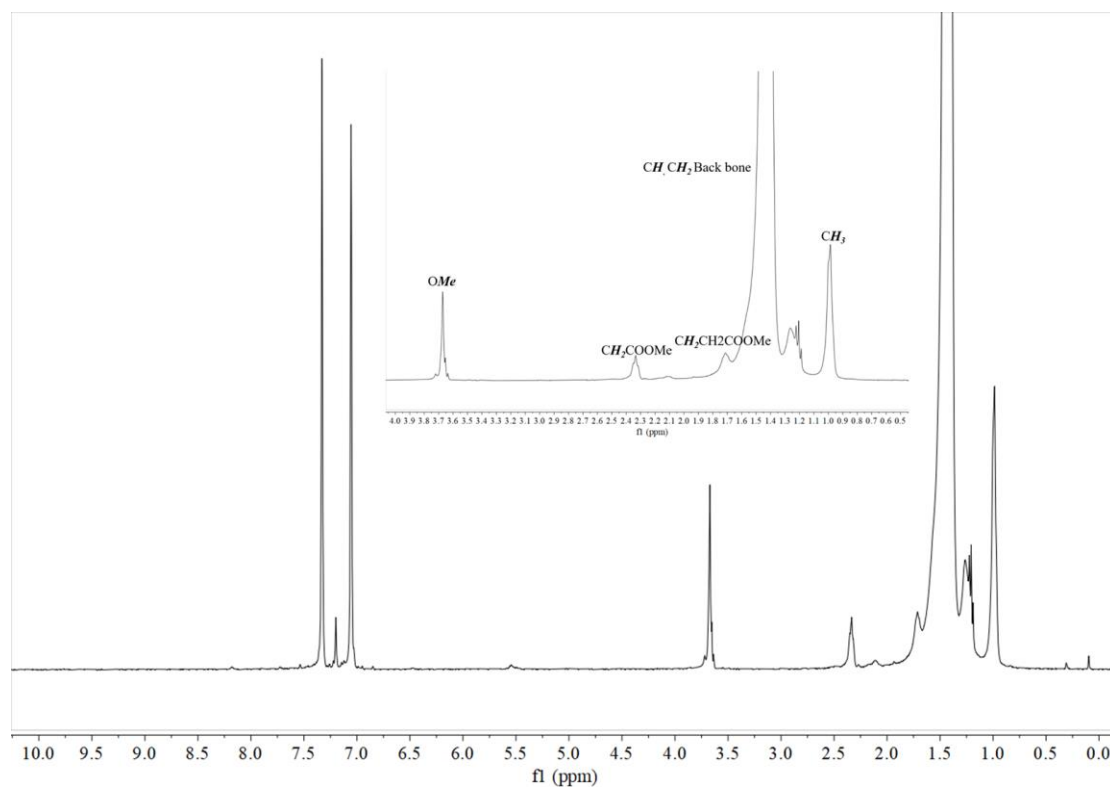

**Figure S44.**  $^1\text{H}$  NMR spectrum of the polymer from table 5, entry 1 ( $\text{C}_6\text{D}_4\text{Cl}_2$ ,  $120^\circ\text{C}$ ).

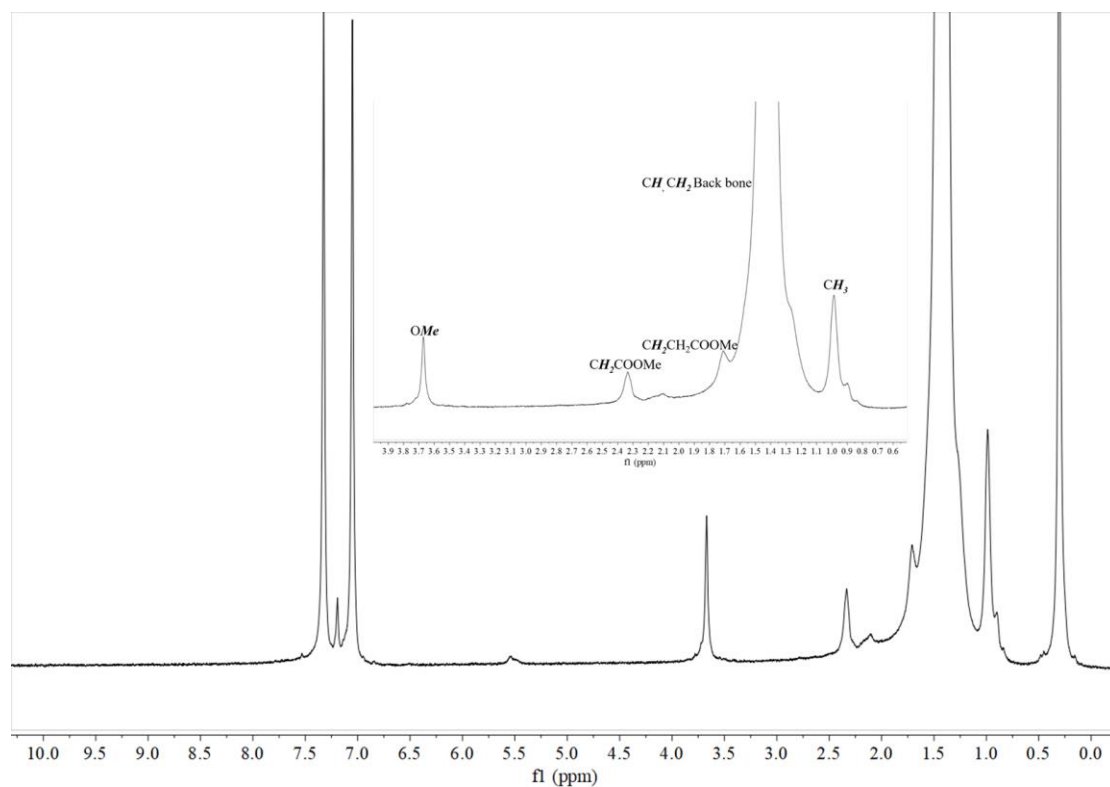

**Figure S45.**  $^1\text{H}$  NMR spectrum of the polymer from table 5, entry 2 ( $\text{C}_6\text{D}_4\text{Cl}_2$ ,  $120^\circ\text{C}$ ).

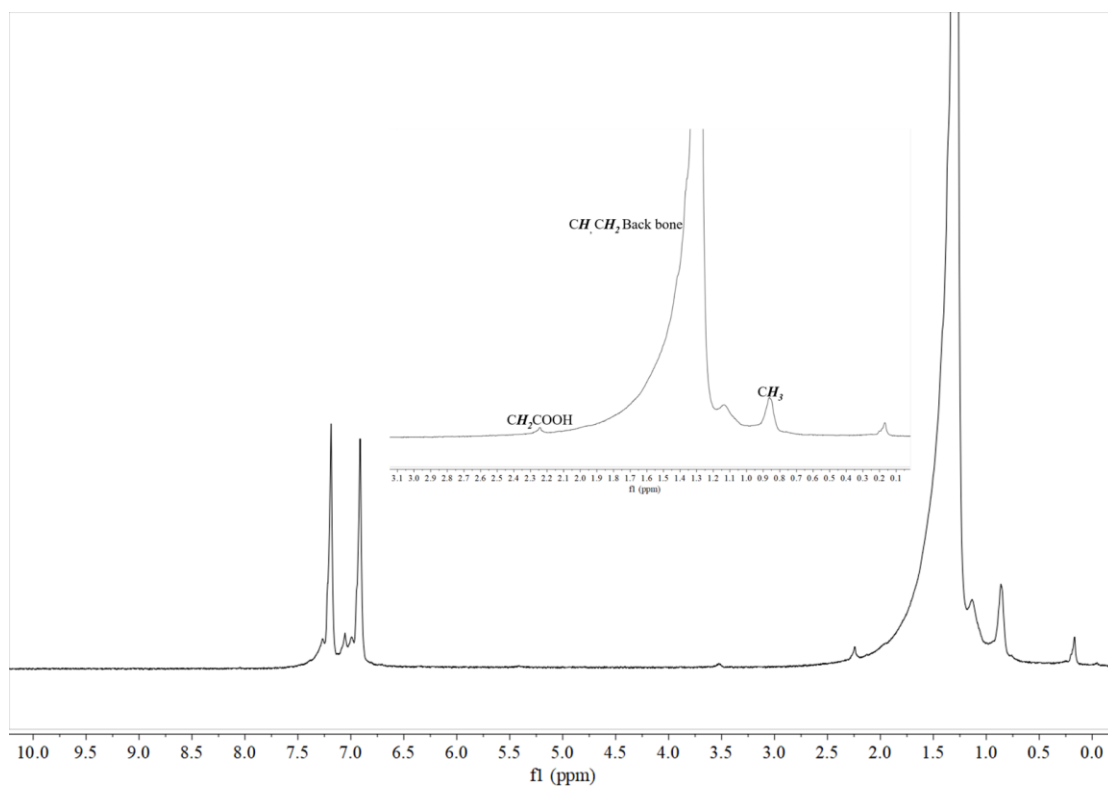

**Figure S46.**  $^1\text{H}$  NMR spectrum of the polymer from table 5, entry 5 ( $\text{C}_6\text{D}_4\text{Cl}_2$ ,  $120^\circ\text{C}$ ).

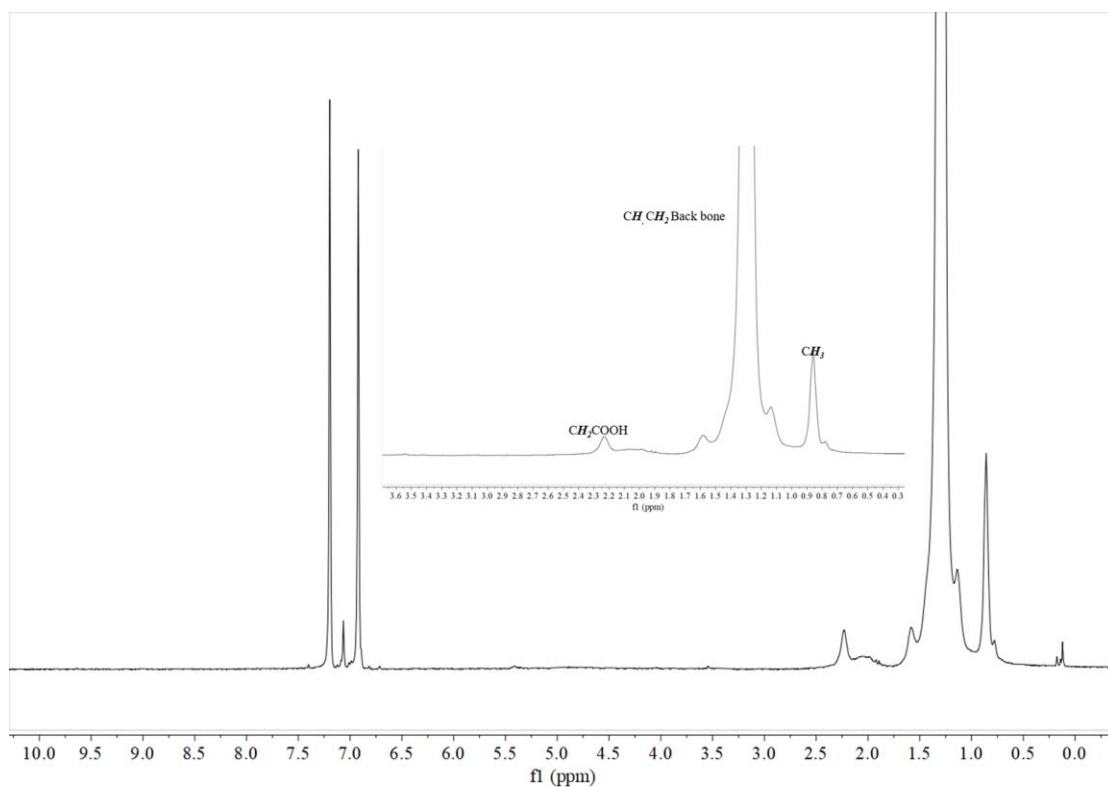

**Figure S47.**  $^1\text{H}$  NMR spectrum of the polymer from table 5, entry 6 ( $\text{C}_6\text{D}_4\text{Cl}_2$ ,  $120^\circ\text{C}$ ).

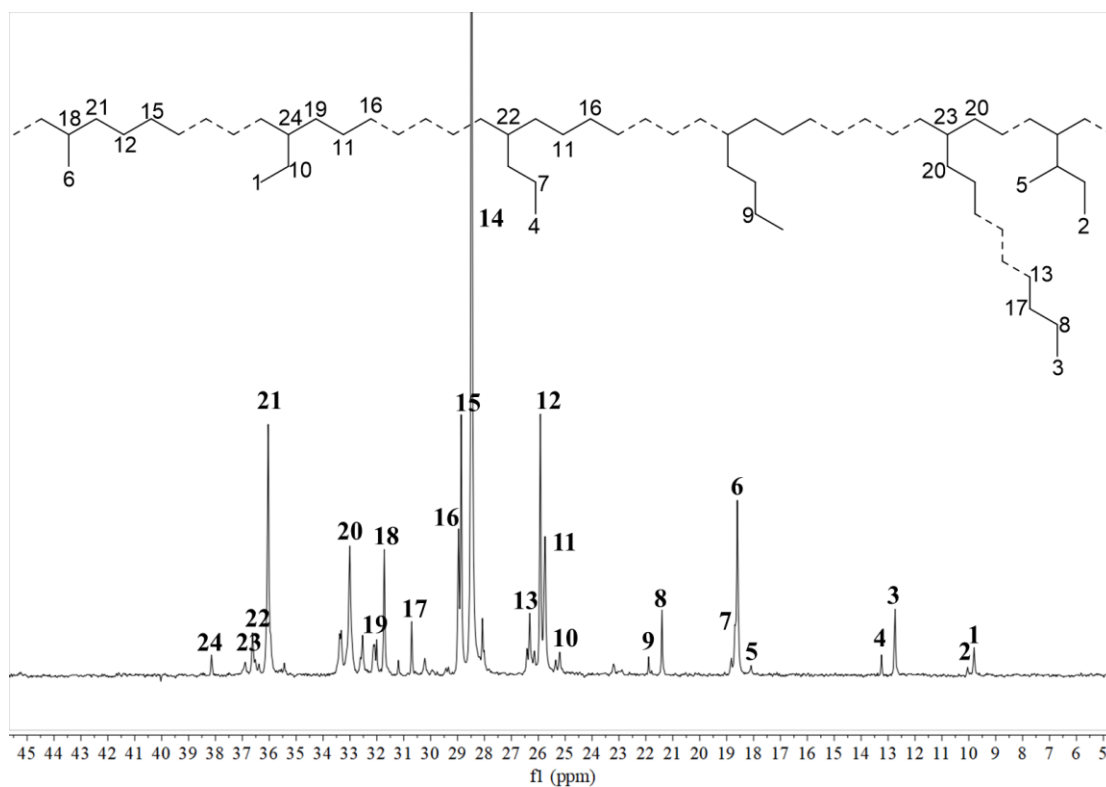

**Figure S48.**  $^{13}\text{C}$  NMR spectrum of the polymer from table 1, entry 1 ( $\text{C}_2\text{D}_2\text{Cl}_4$ ,  $120^\circ\text{C}$ ).

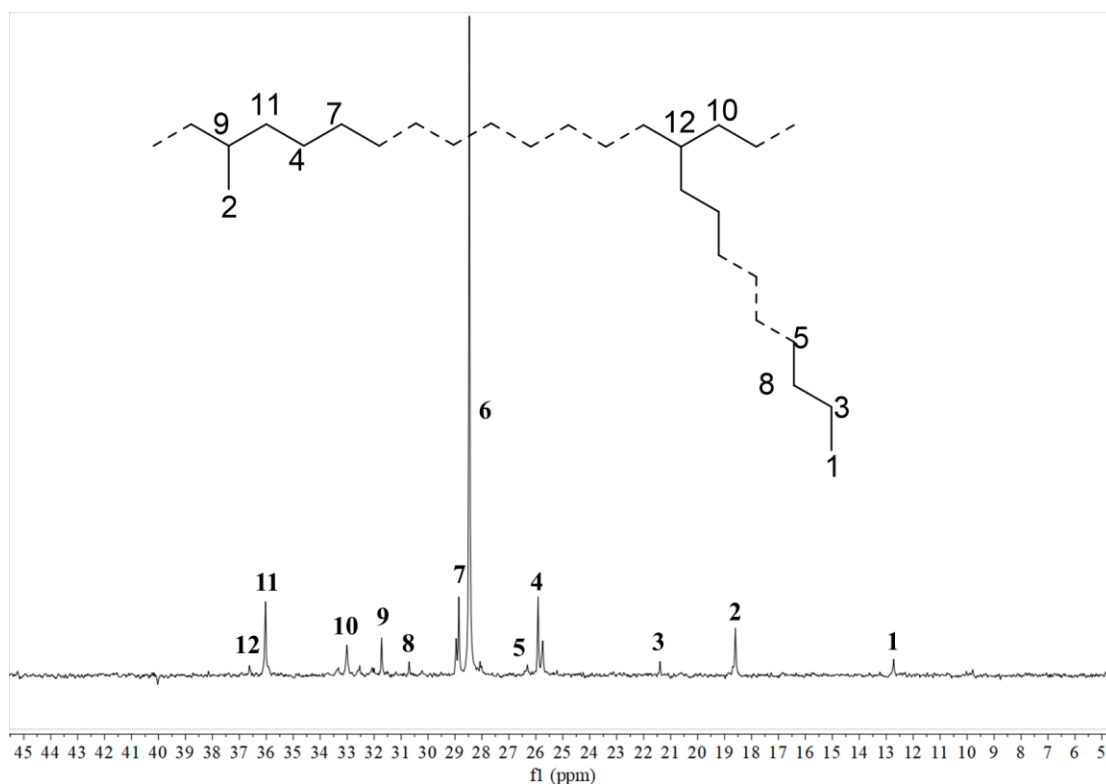

**Figure S49.**  $^{13}\text{C}$  NMR spectrum of the polymer from table 1, entry 4 ( $\text{C}_2\text{D}_2\text{Cl}_4$ ,  $120^\circ\text{C}$ ).

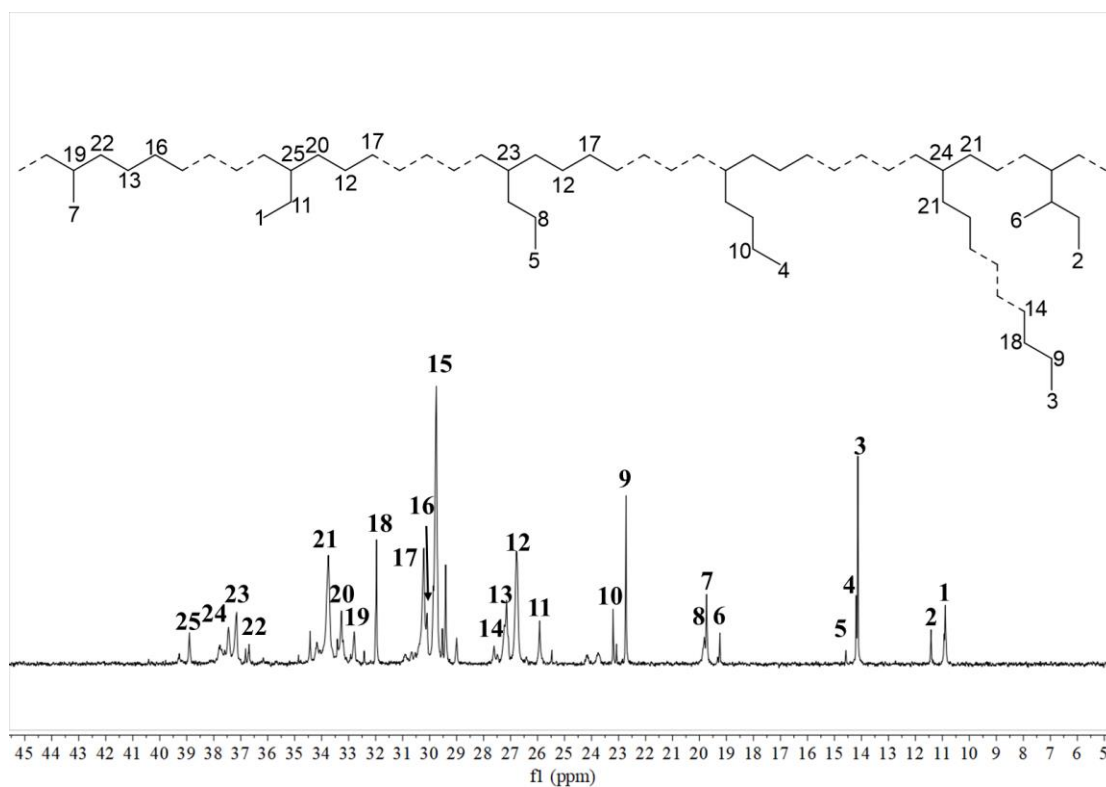

**Figure S50.**  $^{13}\text{C}$  NMR spectrum of the polymer from table 1, entry 10 ( $\text{CDCl}_3$ , 25 °C).

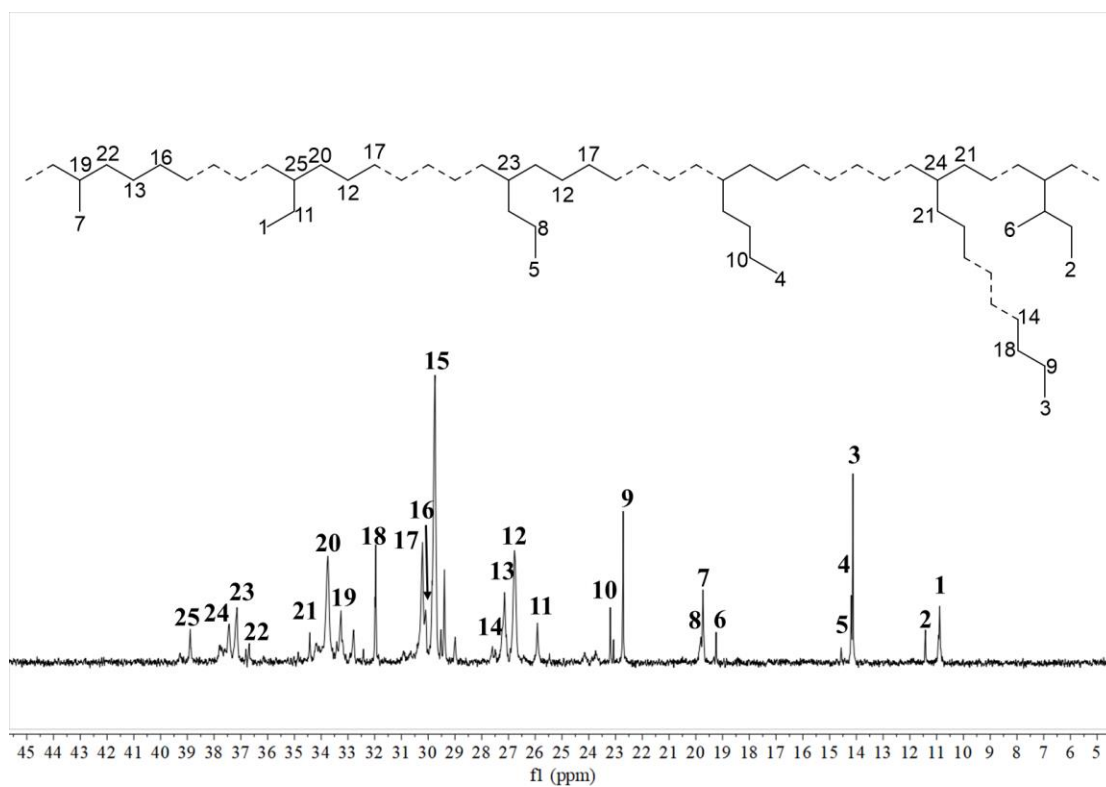

**Figure S51.**  $^{13}\text{C}$  NMR spectrum of the polymer from table 1, entry 13 ( $\text{CDCl}_3$ , 25 °C).

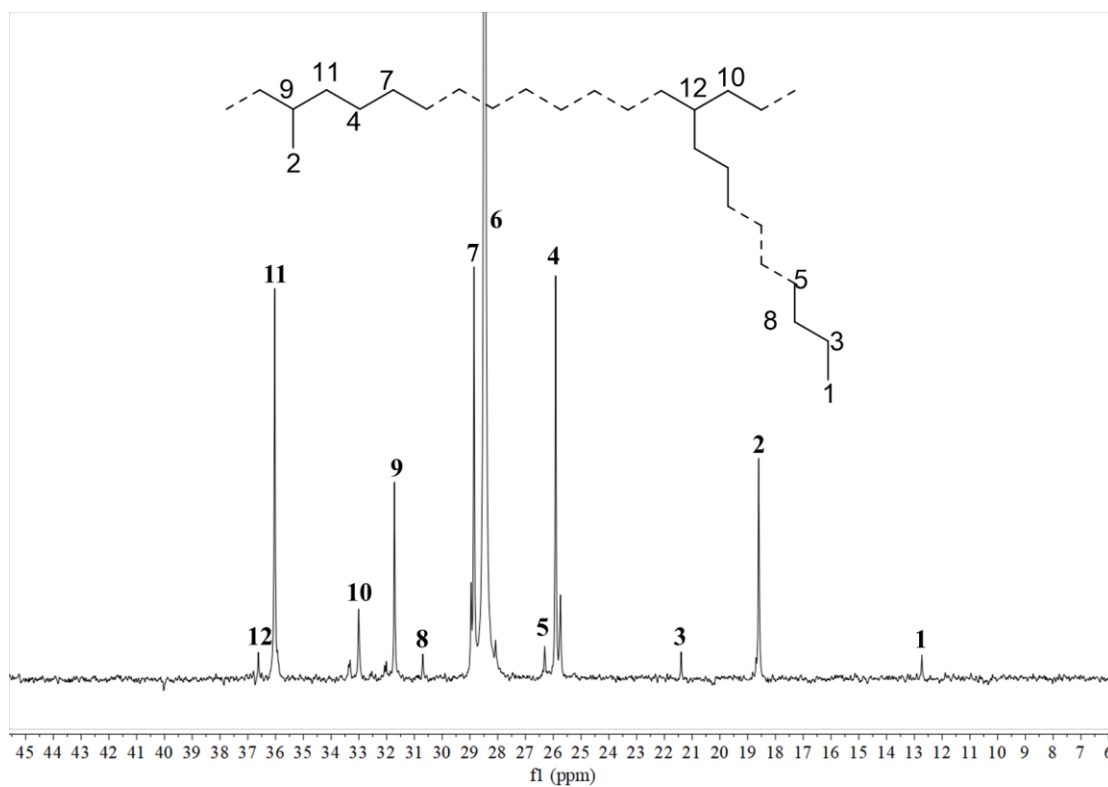

**Figure S52.**  $^{13}\text{C}$  NMR spectrum of the polymer from table 4, entry 1 ( $\text{C}_2\text{D}_2\text{Cl}_4$ ,  $120^\circ\text{C}$ ).

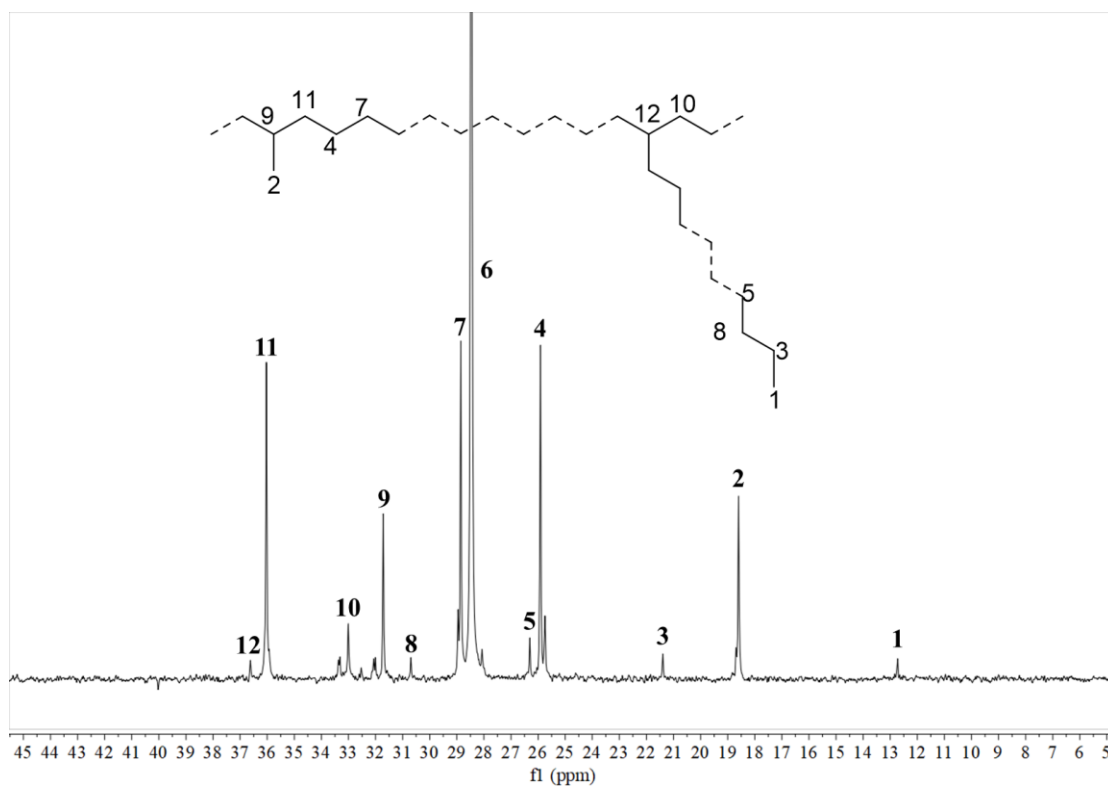

**Figure S53.**  $^{13}\text{C}$  NMR spectrum of the polymer from table 4, entry 5 ( $\text{C}_2\text{D}_2\text{Cl}_4$ ,  $120^\circ\text{C}$ ).

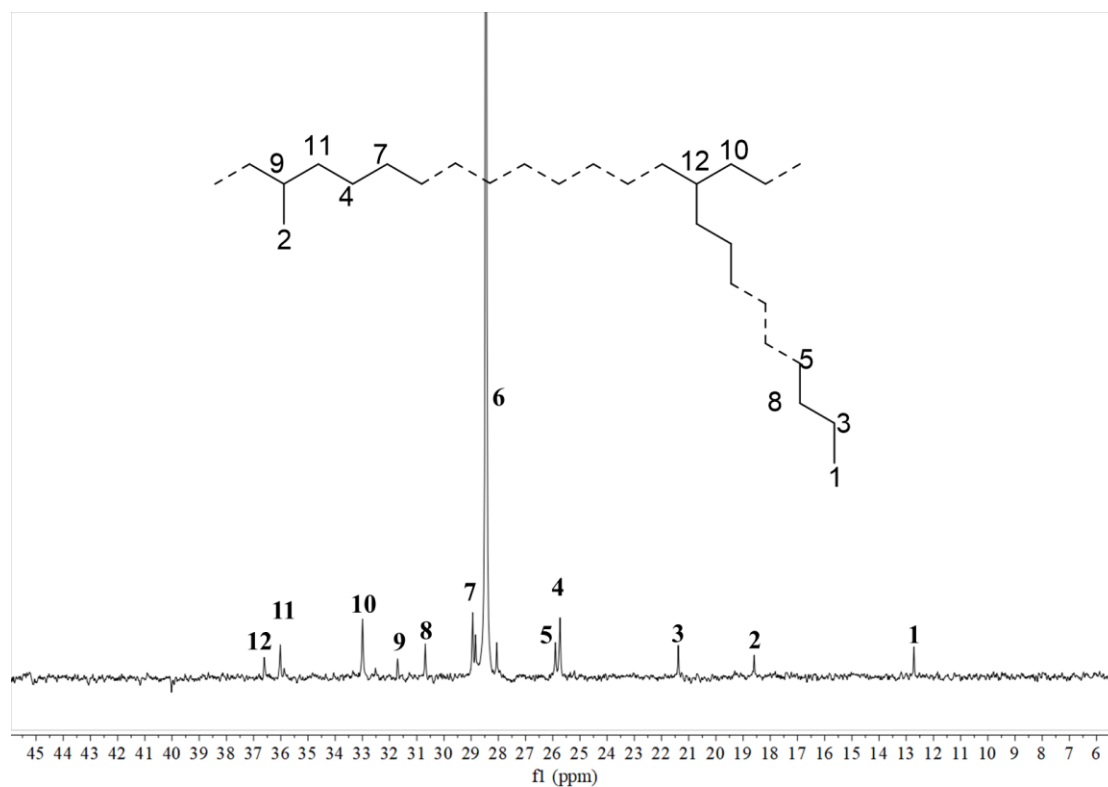

**Figure S54.**  $^{13}\text{C}$  NMR spectrum of the polymer from table 4, entry 9 ( $\text{C}_2\text{D}_2\text{Cl}_4$ ,  $120^\circ\text{C}$ ).

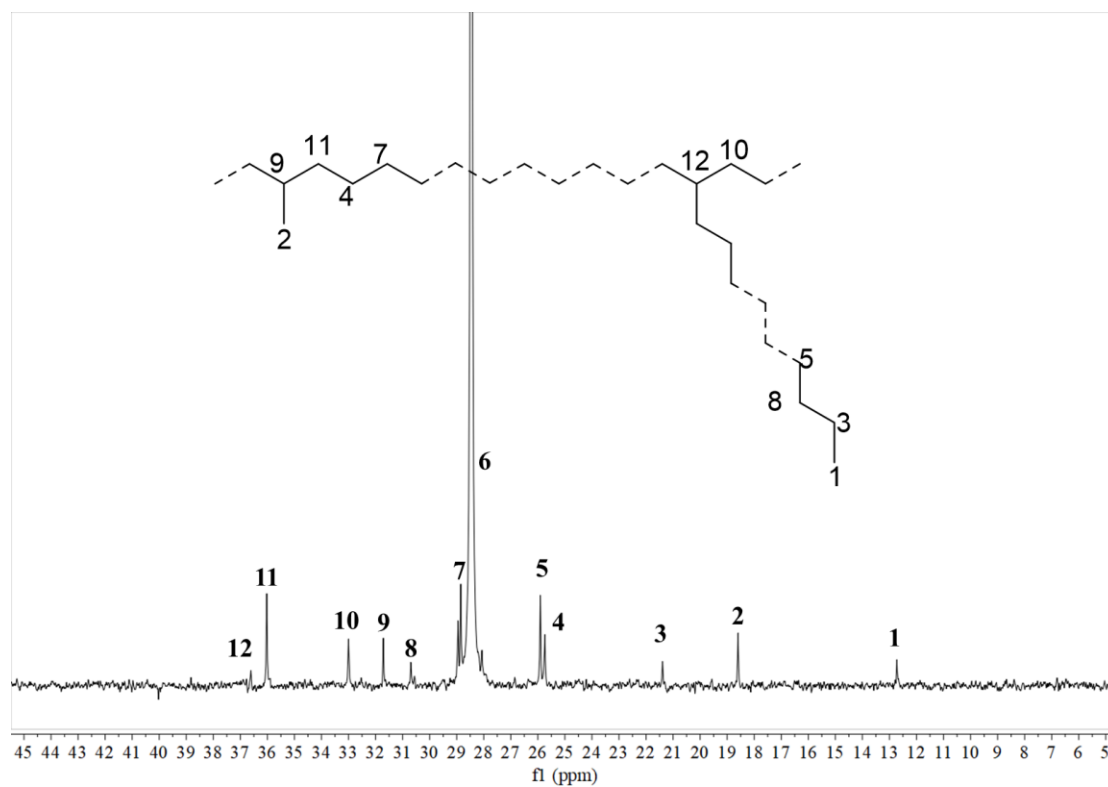

**Figure S55.**  $^{13}\text{C}$  NMR spectrum of the polymer from table 4, entry 13 ( $\text{C}_2\text{D}_2\text{Cl}_4$ ,  $120^\circ\text{C}$ ).

### 3.5. DSC, GPC of Polymers

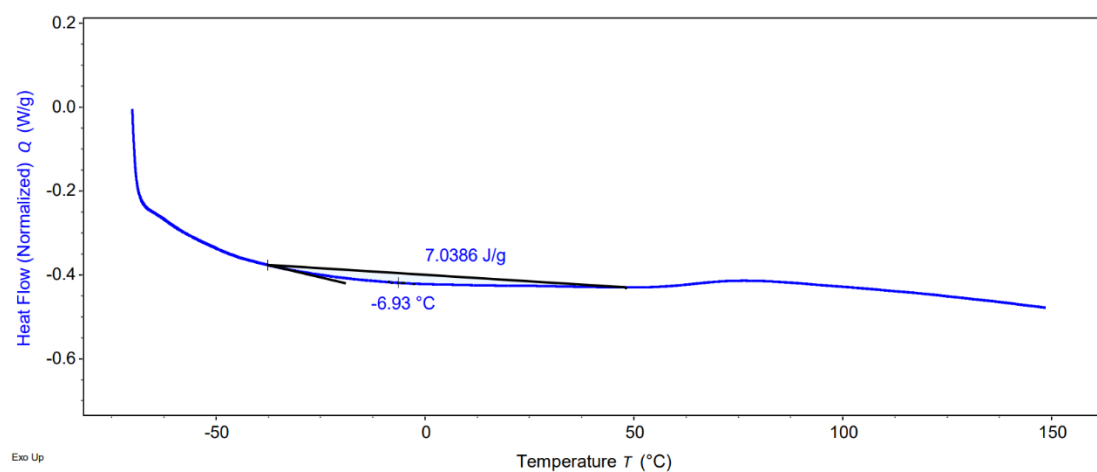

**Figure S56.** DSC of the polymer from table 1, entry 1.

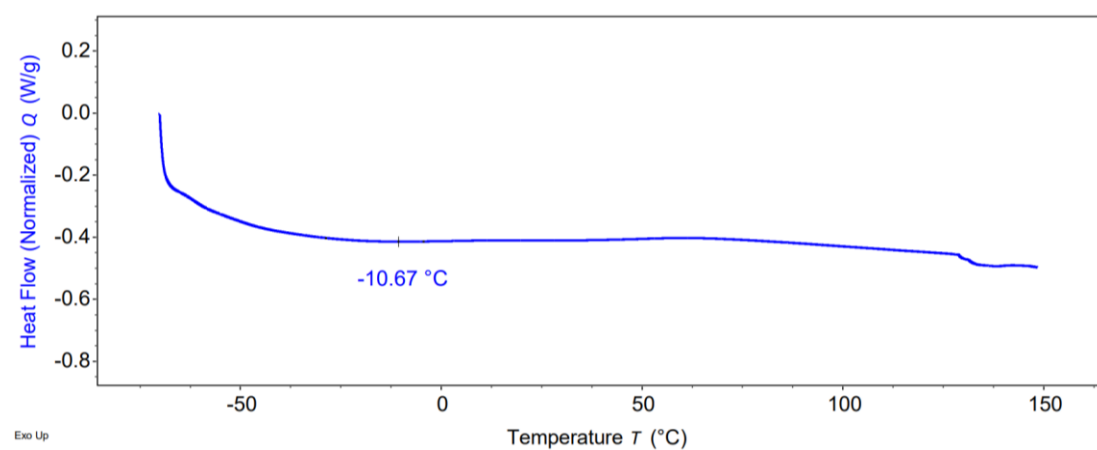

**Figure S57.** DSC of the polymer from table 1, entry 2.

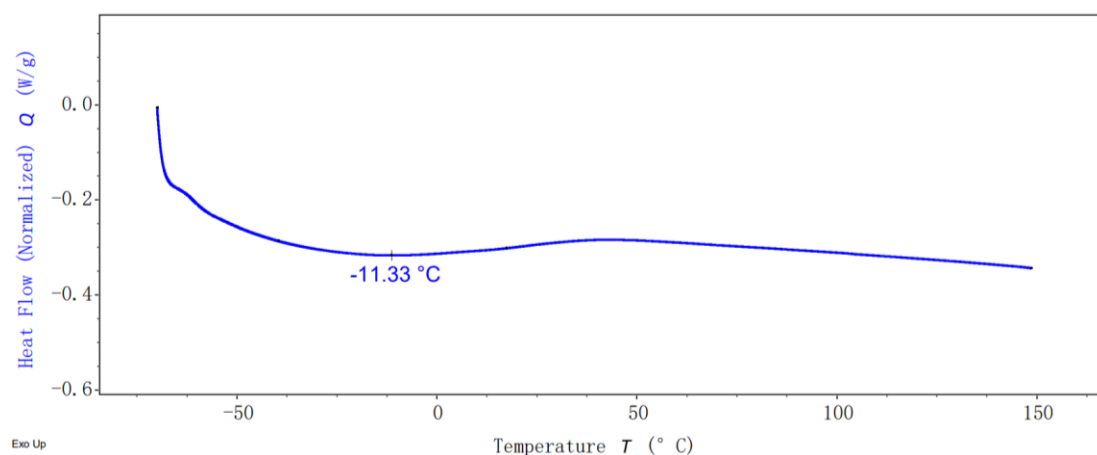

**Figure S58.** DSC of the polymer from table 1, entry 3.

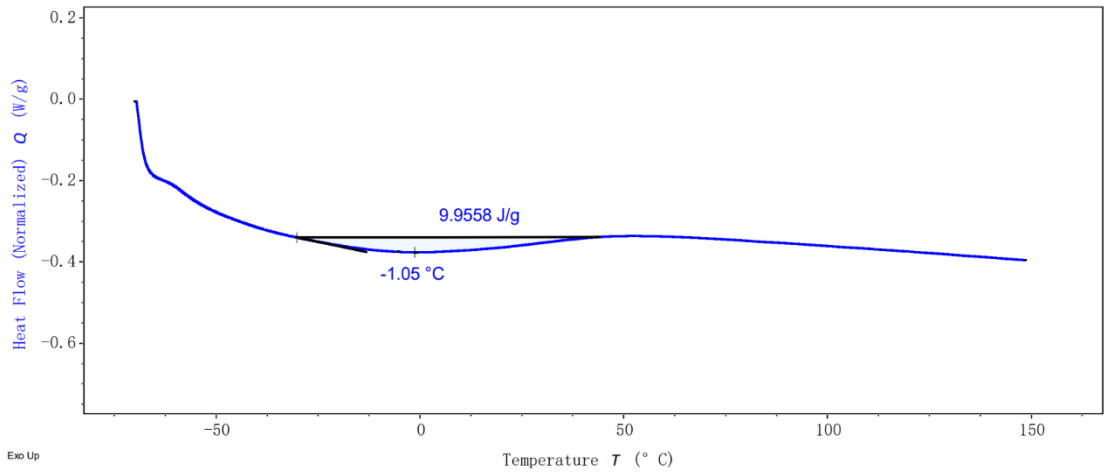

**Figure S59.** DSC of the polymer from table 1, entry 4.

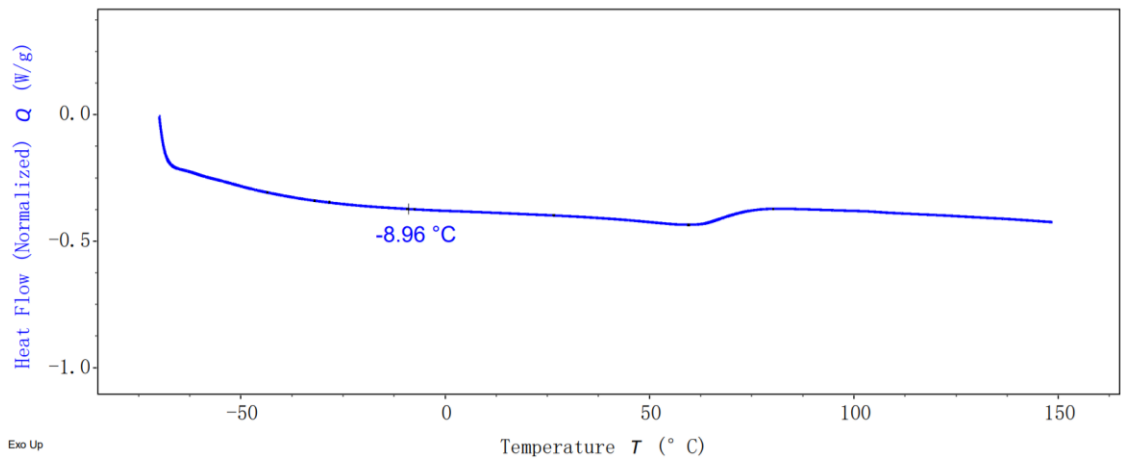

**Figure S60.** DSC of the polymer from table 1, entry 5.

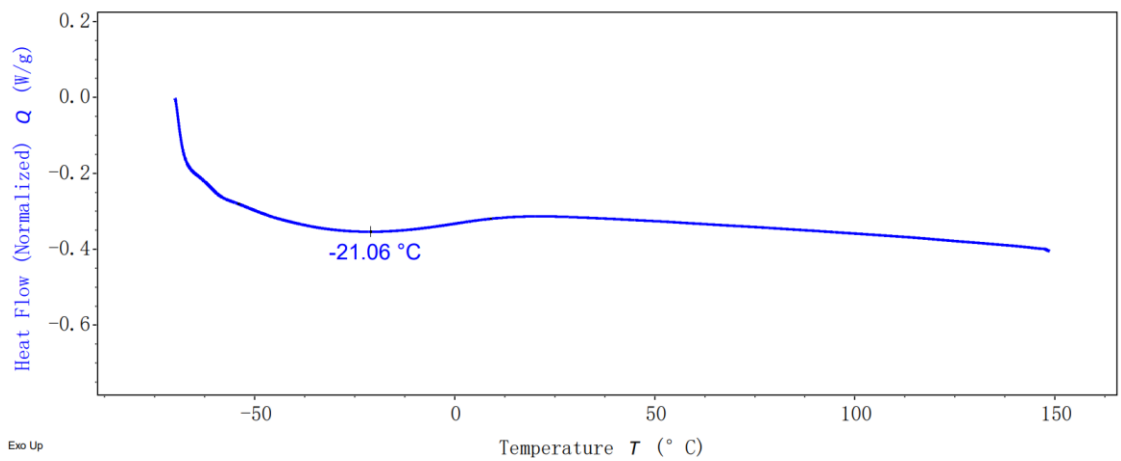

**Figure S61.** DSC of the polymer from table 1, entry 6.



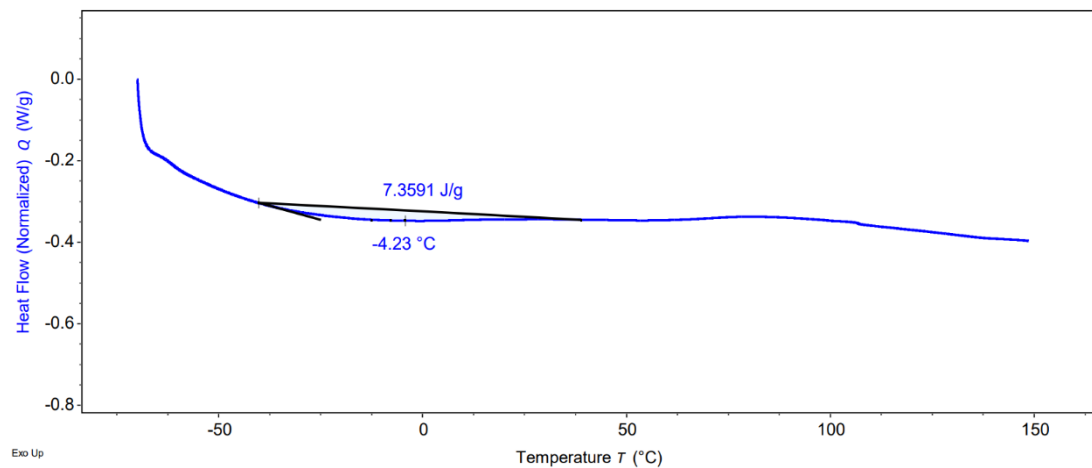

**Figure S62.** DSC of the polymer from table 1, entry 7.

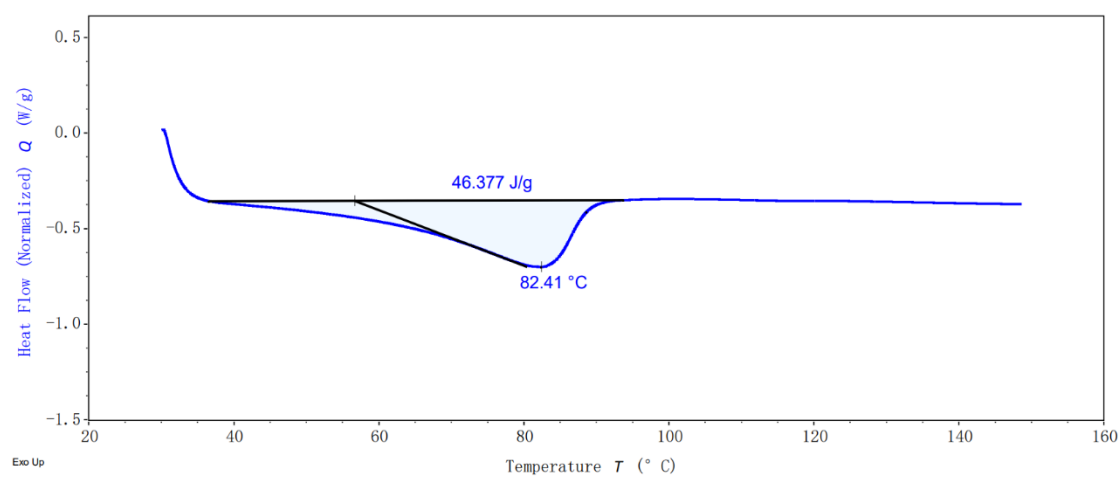

**Figure S63.** DSC of the polymer from table 4, entry 1.

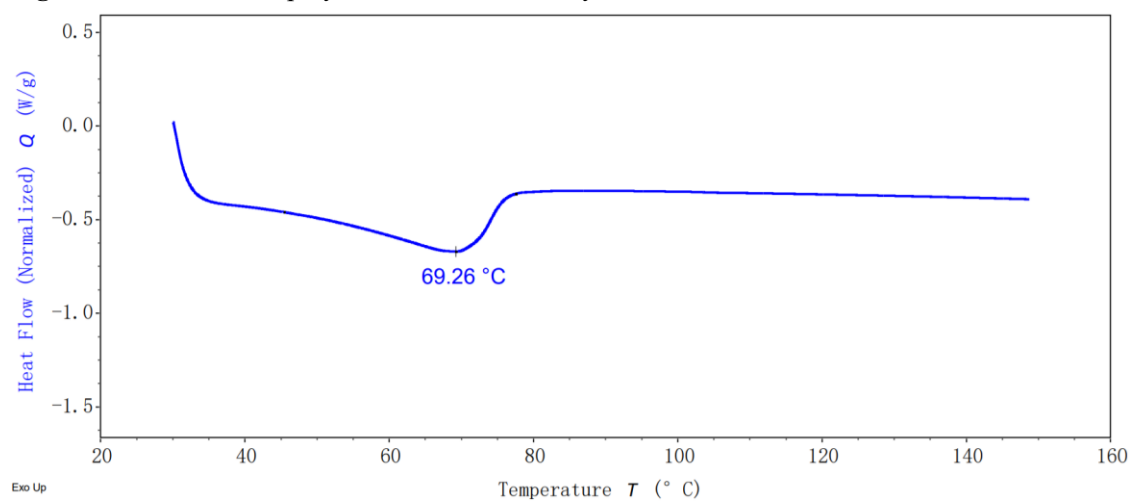

**Figure S64.** DSC of the polymer from table 4, entry 2.

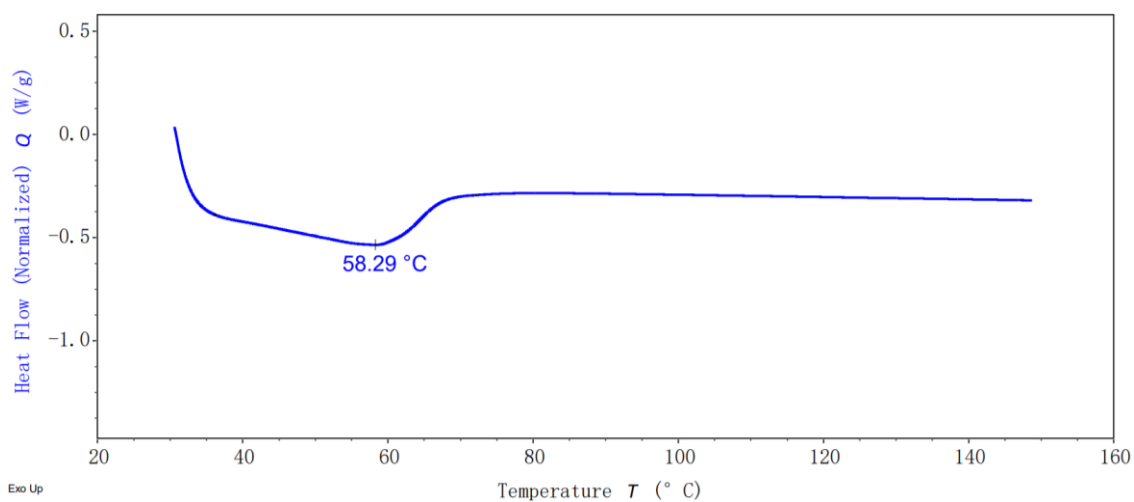

**Figure S65.** DSC of the polymer from table 4, entry 3.

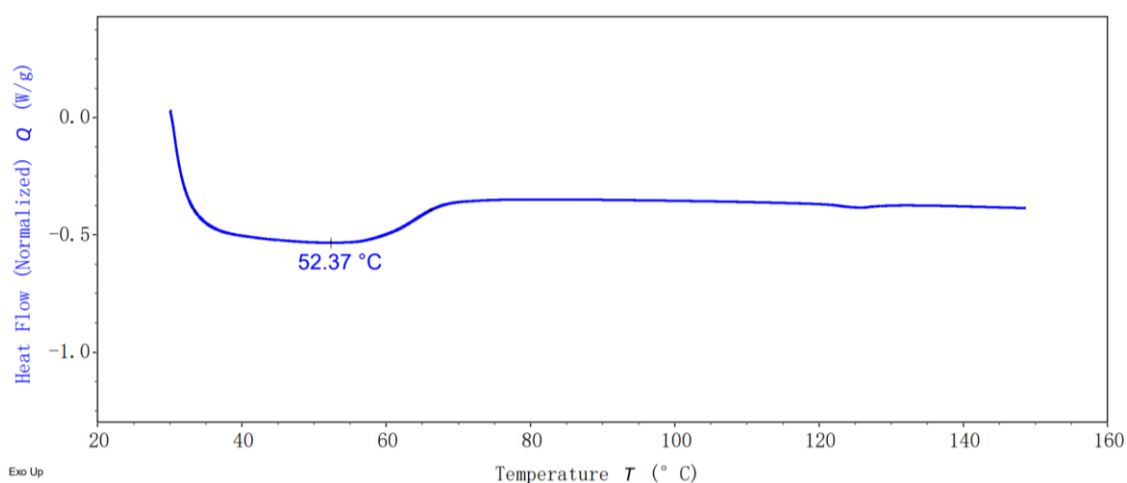

**Figure S66.** DSC of the polymer from table 4, entry 4.

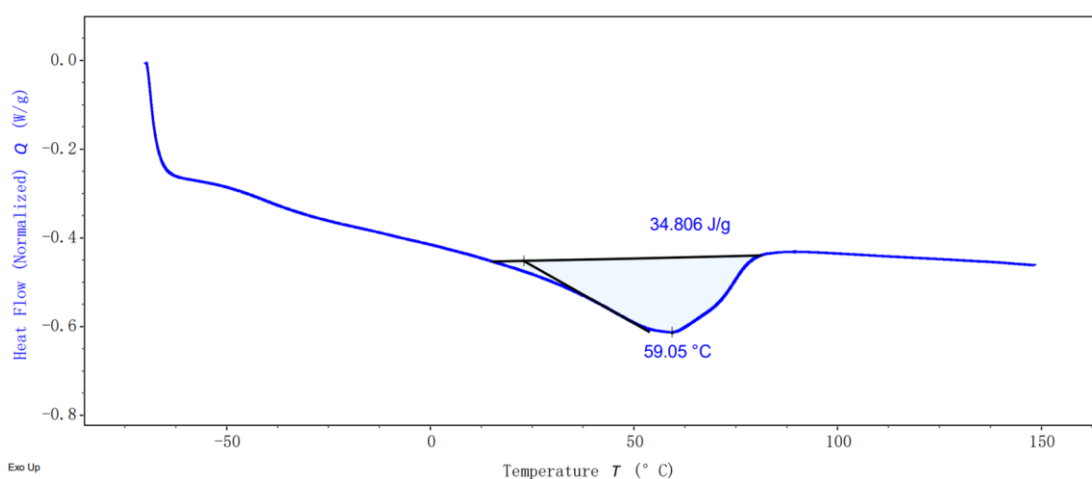

**Figure S67.** DSC of the polymer from table 4, entry 5.

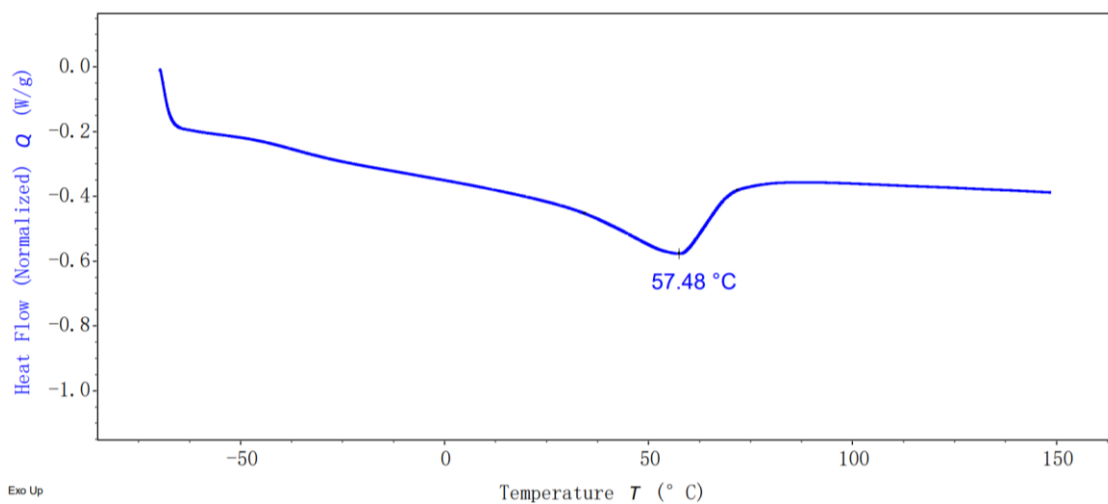

**Figure S68.** DSC of the polymer from table 4, entry 6.

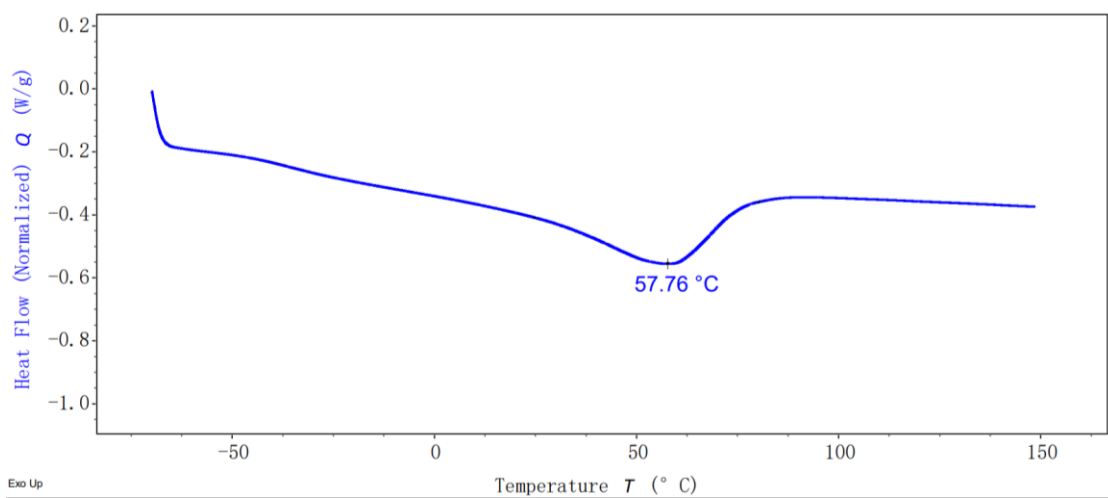

**Figure S69.** DSC of the polymer from table 4, entry 7.

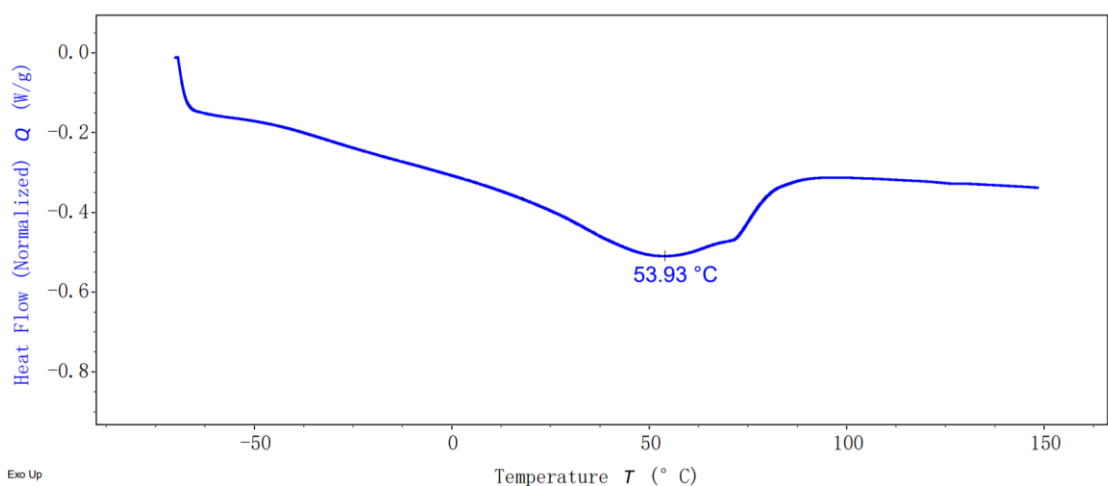

**Figure S70.** DSC of the polymer from table 4, entry 8.

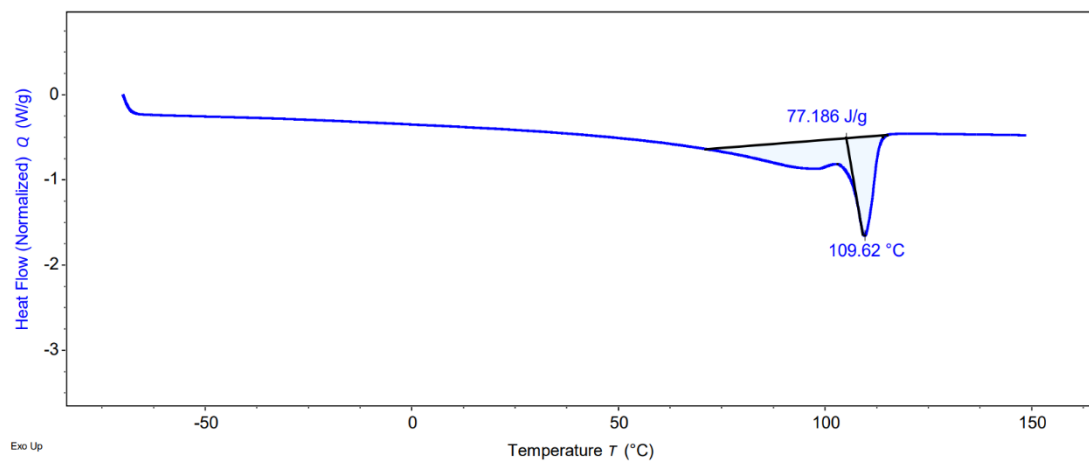

**Figure S71.** DSC of the polymer from table 4, entry 9.

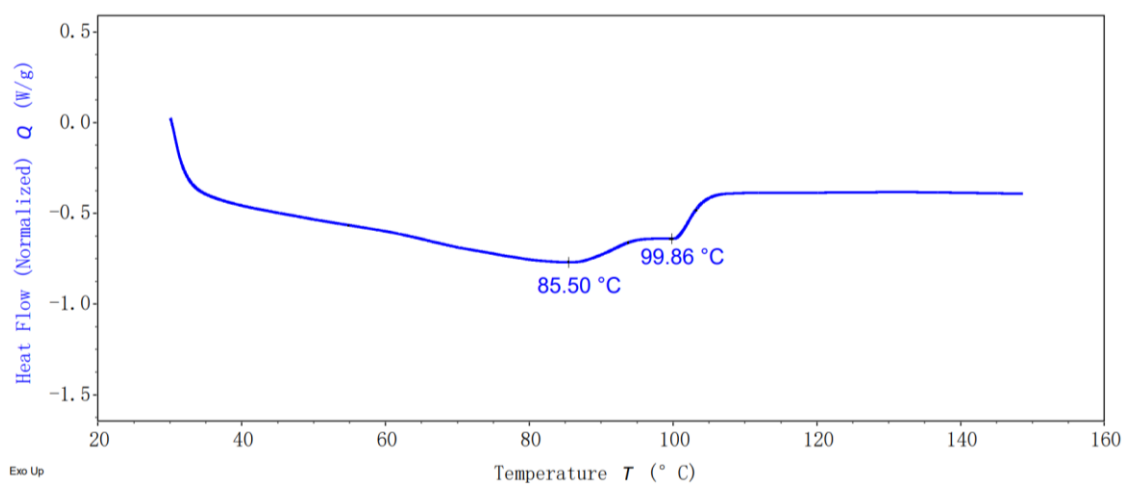

**Figure S72.** DSC of the polymer from table 4, entry 10.

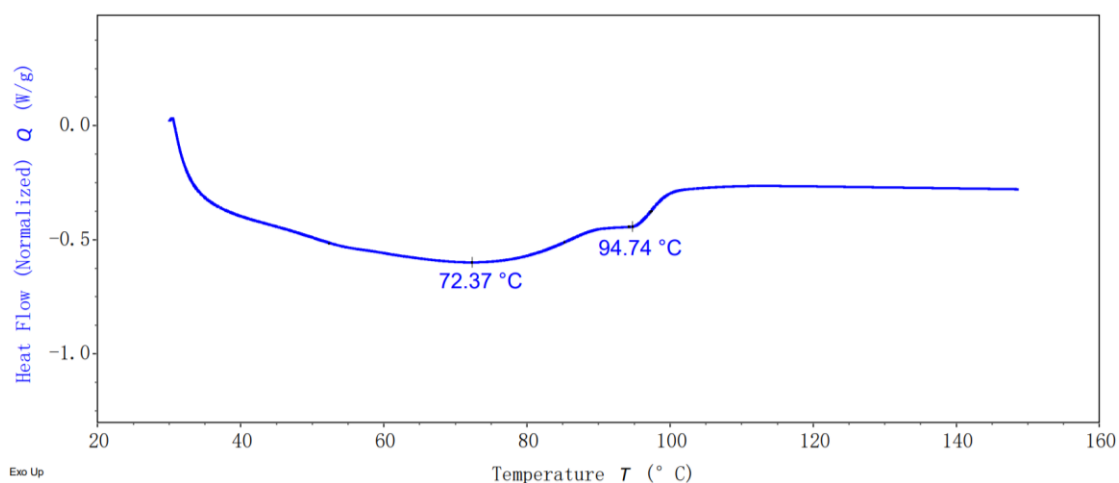

**Figure S73.** DSC of the polymer from table 4, entry 11.

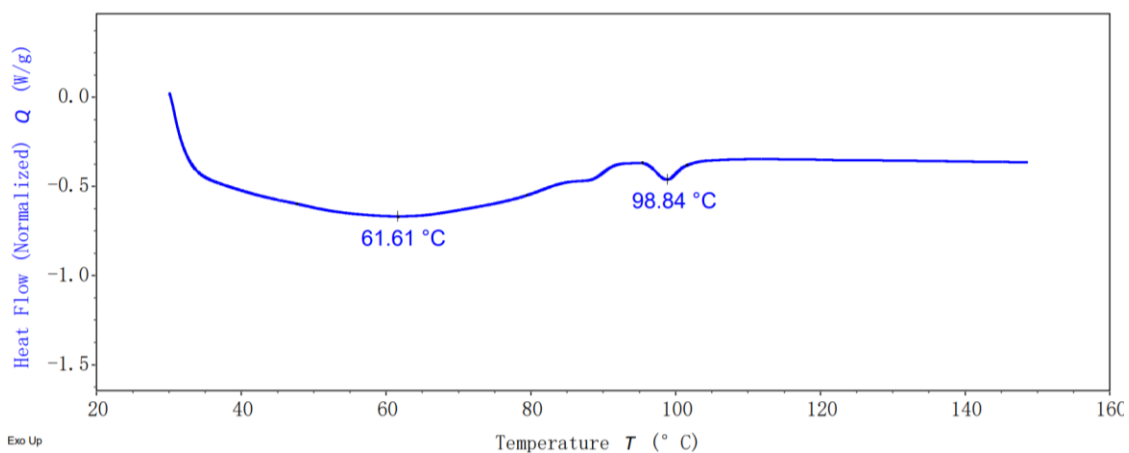

**Figure S74.** DSC of the polymer from table 4, entry 12.

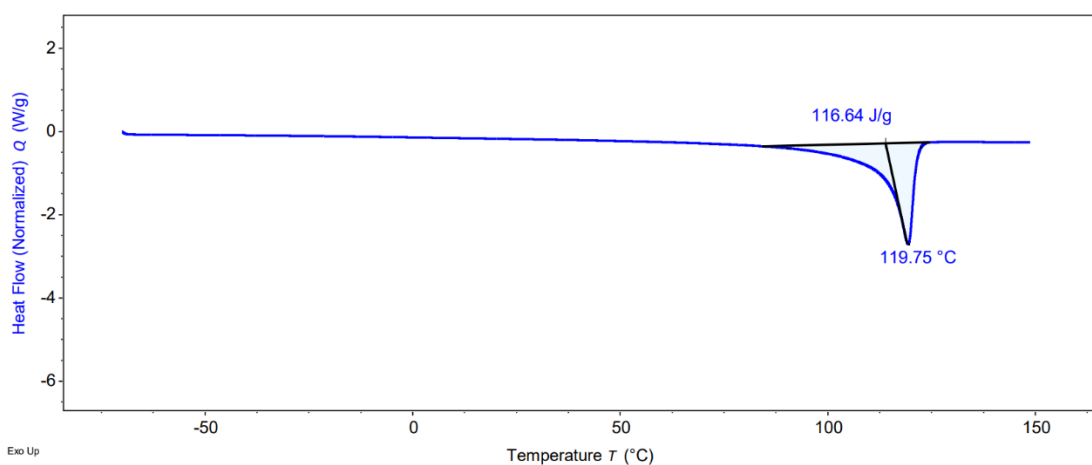

**Figure S75.** DSC of the polymer from table 4, entry 13.

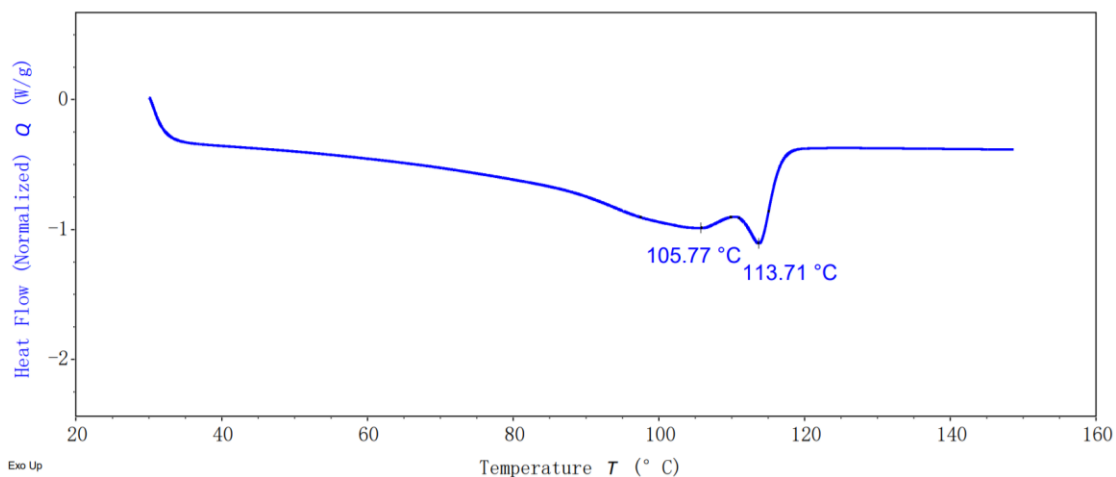

**Figure S76.** DSC of the polymer from table 4, entry 14.

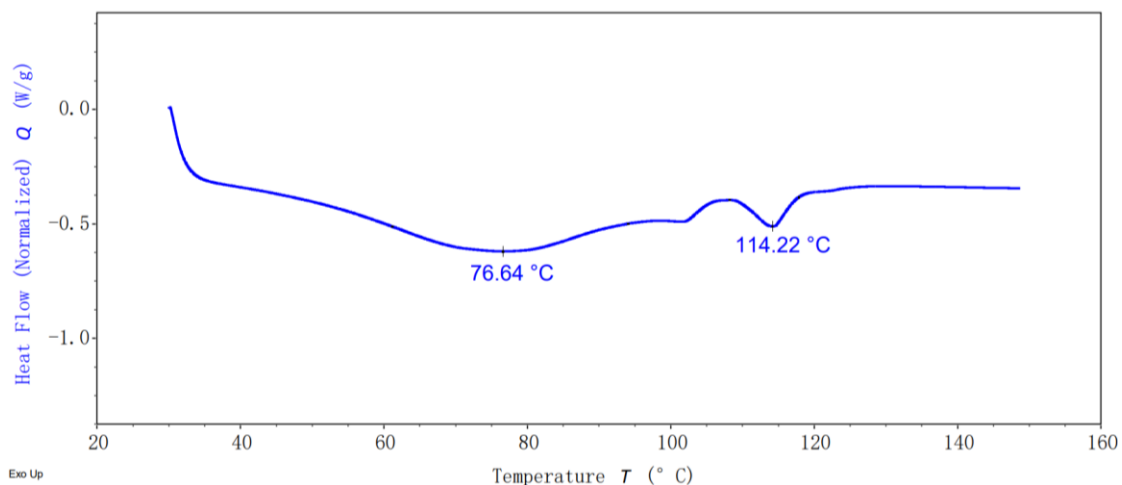

**Figure S77.** DSC of the polymer from table 4, entry 15.

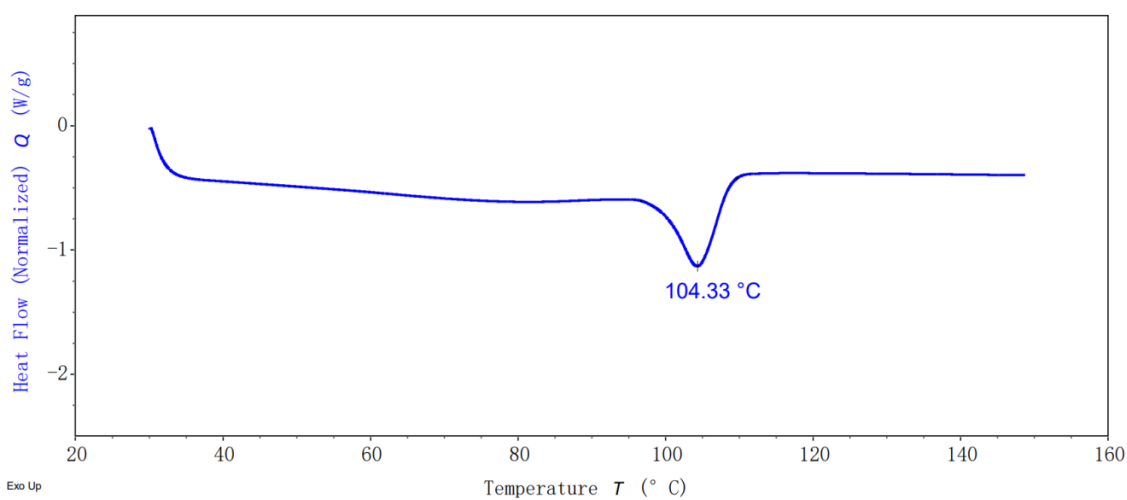

**Figure S78.** DSC of the polymer from table 5, entry 1.

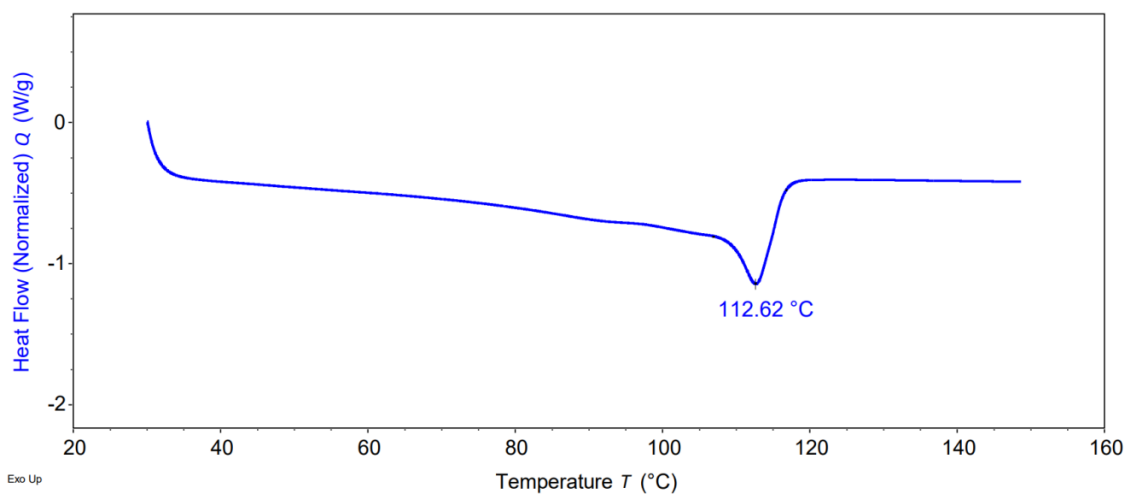

**Figure S79.** DSC of the polymer from table 5, entry 2.

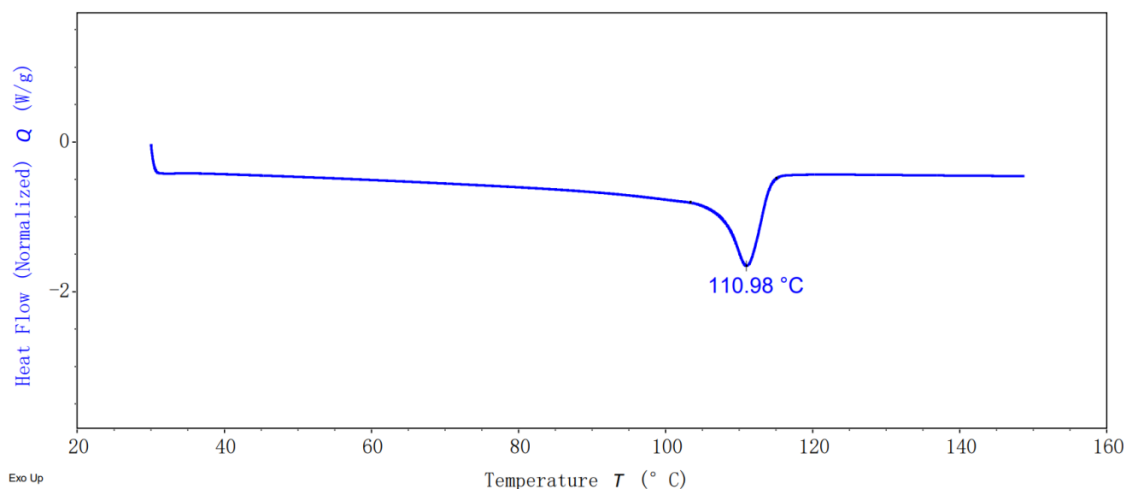

**Figure S80.** DSC of the polymer from table 5, entry 5.

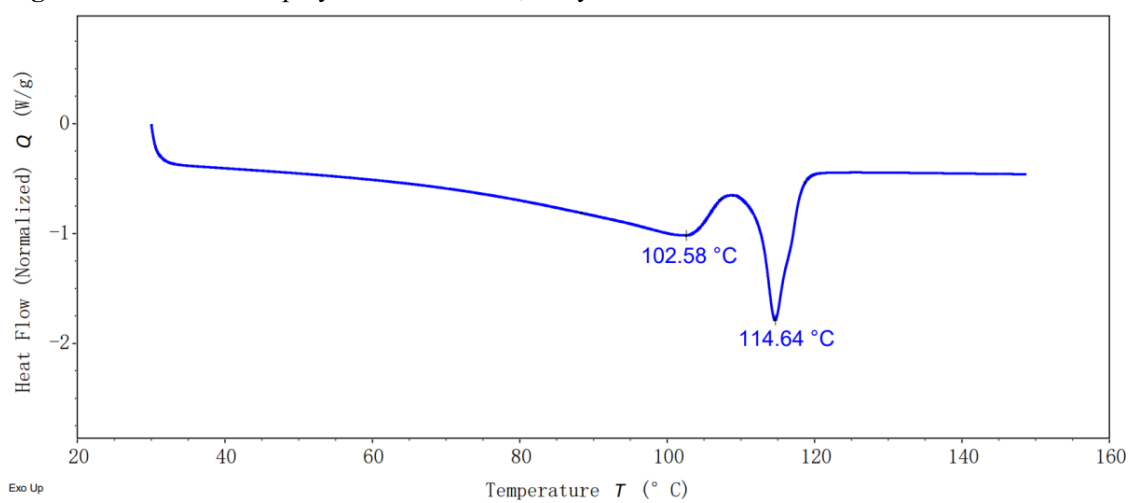

**Figure S81.** DSC of the polymer from table 5, entry 6.

## Cirrus GPC Sample Peak Report

### MW Averages

Mp: 322062      Mn: 217886      Mv: 379375      Mw: 411978  
Mz: 670246      Mz+1: 956760      PD: 1.8908

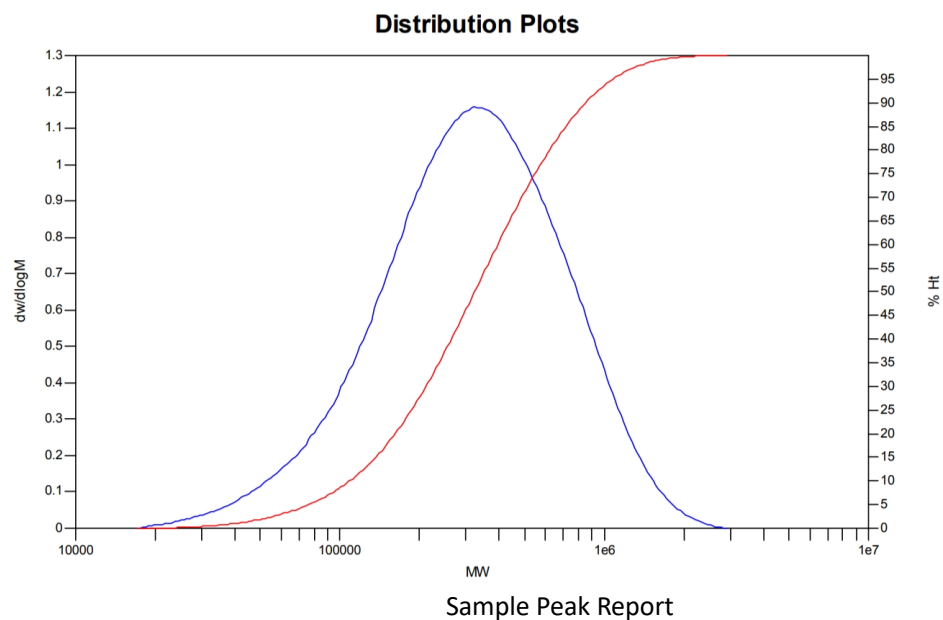

### MW Ranges

| Range No | High Limit | Low Limit | %Area  |
|----------|------------|-----------|--------|
| 1        | 2902778    | 50000     | 98.097 |
| 2        | 50000      | 40000     | 0.891  |
| 3        | 40000      | 30000     | 0.642  |
| 4        | 30000      | 20000     | 0.348  |
| 5        | 20000      | 17170     | 0.022  |

**Figure S82.** GPC of the polymer from table 1, entry 1.



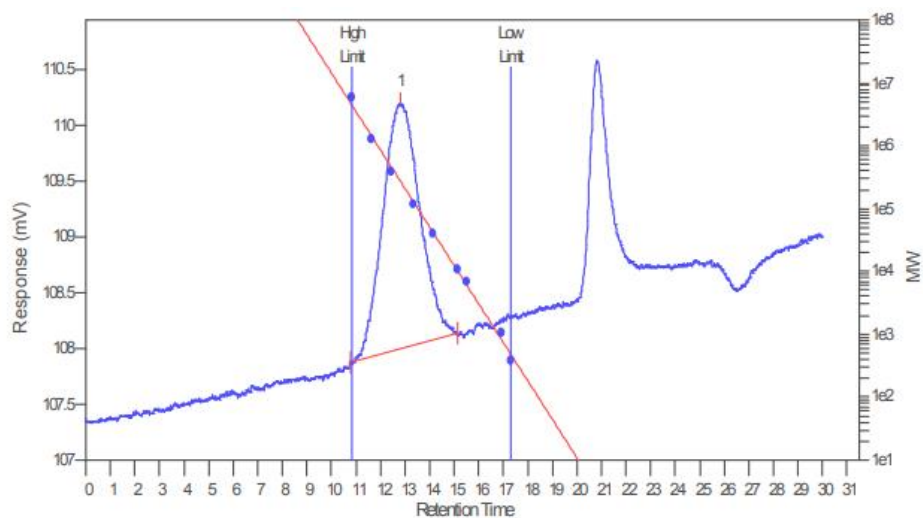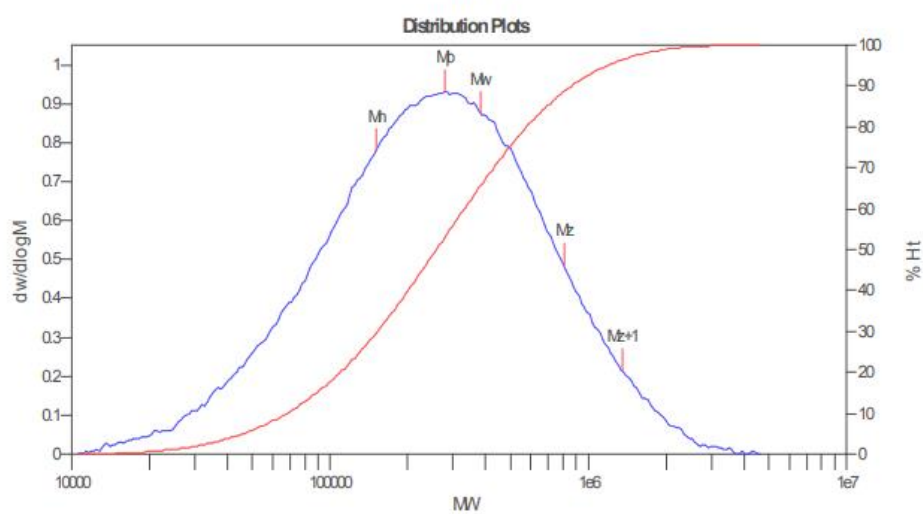

**MW Averages**

| Peak No | Mp     | Mn     | Mw     | Mz     | Mz+1    | Mv     | PD     |
|---------|--------|--------|--------|--------|---------|--------|--------|
| 1       | 277312 | 150175 | 383802 | 803325 | 1350570 | 338487 | 2.5557 |

**Processed Peaks**

| Peak No | Name | Start RT (mins) | Max RT (mins) | End RT (mins) | Pk Height (mV) | % Height | Area (mV.secs) | % Area |
|---------|------|-----------------|---------------|---------------|----------------|----------|----------------|--------|
| 1       |      | 10.80           | 12.80         | 15.12         | 2.21118        | 0        | 232.494        | 100    |

**Figure S83.** GPC of the polymer from table 1, entry 2.

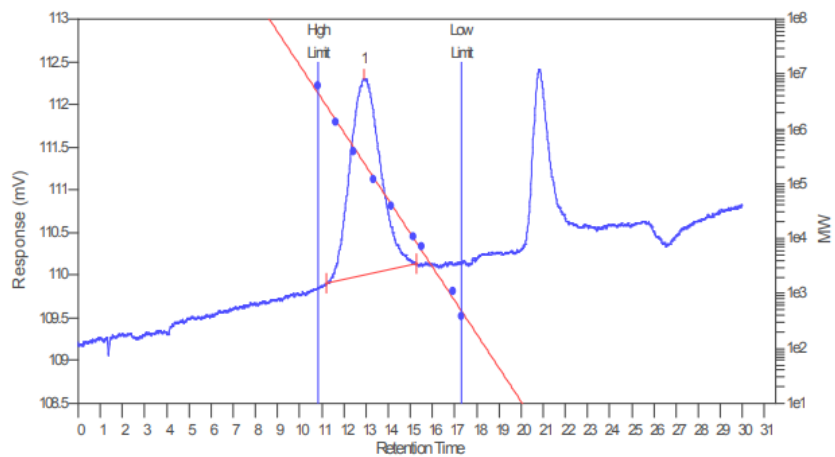

Distribution Plots

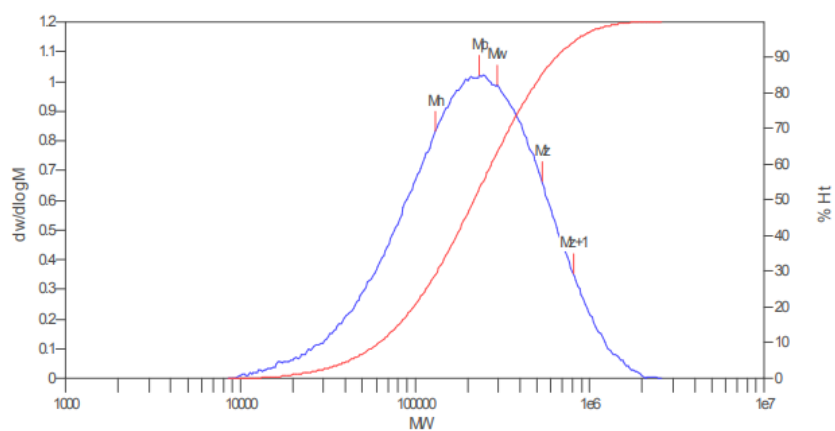

**MW Averages**

| Peak No | Mp     | Mn     | Mw     | Mz     | Mz+1   | Mv     | PD      |
|---------|--------|--------|--------|--------|--------|--------|---------|
| 1       | 235247 | 131180 | 295409 | 533497 | 804770 | 266668 | 2.25194 |

**Processed Peaks**

| Peak No | Name | Start RT (mins) | Max RT (mins) | End RT (mins) | Pk Height (mV) | % Height | Area (mV.secs) | % Area |
|---------|------|-----------------|---------------|---------------|----------------|----------|----------------|--------|
| 1       |      | 11.22           | 12.92         | 15.27         | 2.29767        | 0        | 220.843        | 100    |

**Figure S84.** GPC of the polymer from table 1, entry 3.

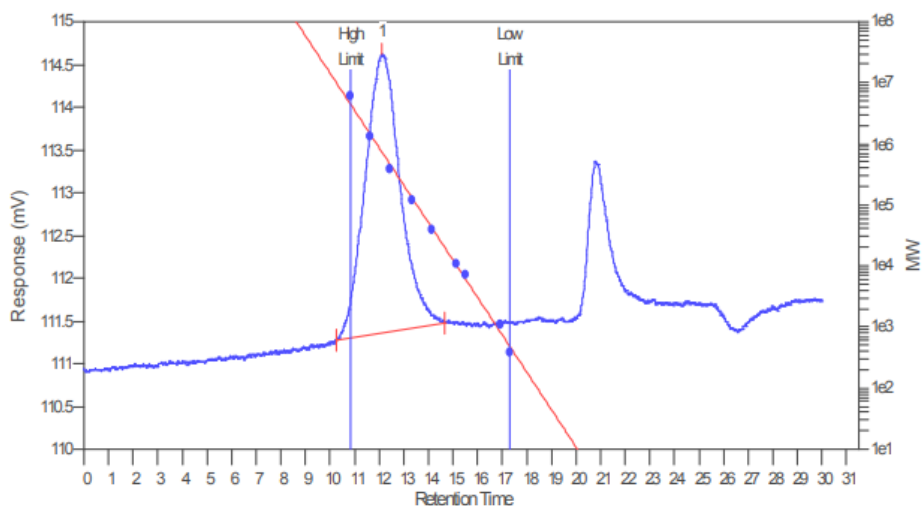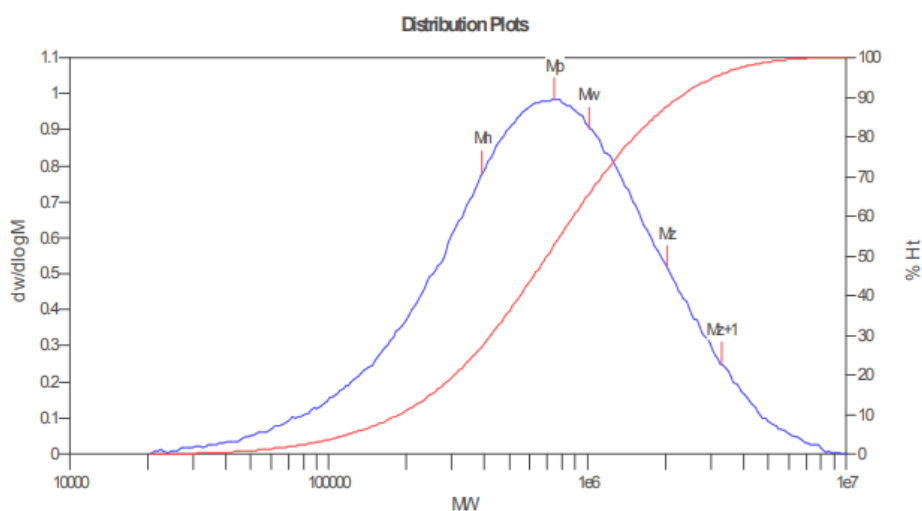

**MW Averages**

| Peak No | Mp     | Mn     | Mw      | Mz      | Mz+1    | Mv     | PD      |
|---------|--------|--------|---------|---------|---------|--------|---------|
| 1       | 744119 | 392455 | 1012324 | 2035417 | 3290233 | 898090 | 2.57947 |

**Processed Peaks**

| Peak No | Name | Start RT (mins) | Max RT (mins) | End RT (mins) | Pk Height (mV) | % Height | Area (mV.secs) | % Area |
|---------|------|-----------------|---------------|---------------|----------------|----------|----------------|--------|
| 1       |      | 10.25           | 12.10         | 14.65         | 3.25376        | 0        | 323.794        | 100    |

**Figure S85.** GPC of the polymer from table 1, entry 4.

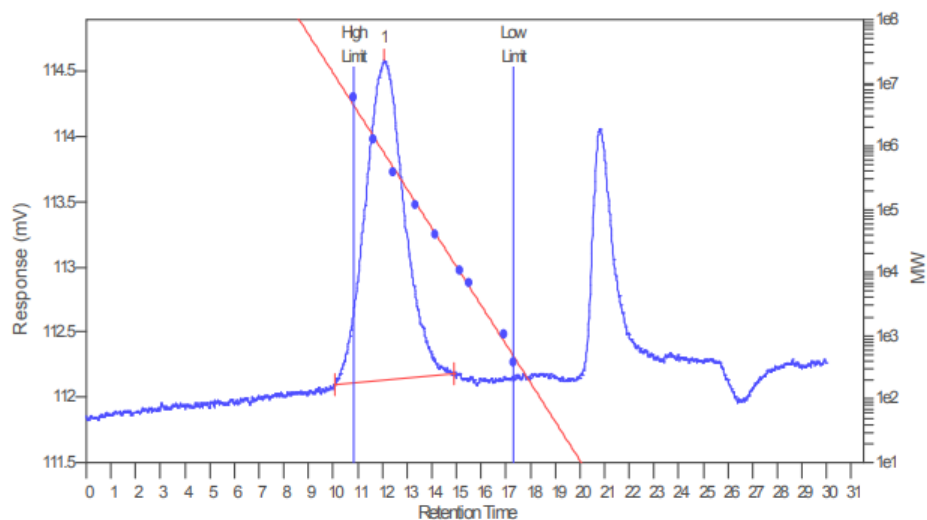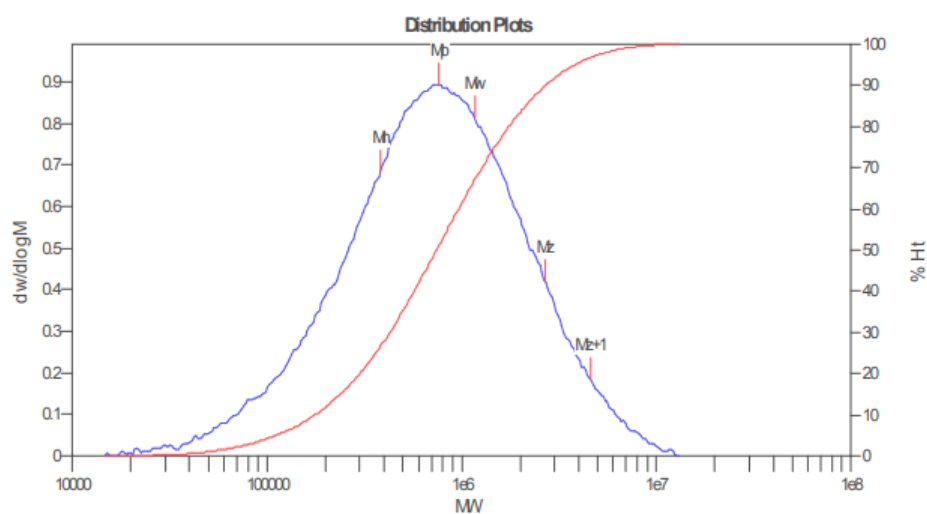

**MW Averages**

| Peak No | Mp     | Mn     | Mw      | Mz      | Mz+1    | Mv      | PD      |
|---------|--------|--------|---------|---------|---------|---------|---------|
| 1       | 761814 | 382755 | 1172752 | 2680704 | 4608172 | 1016351 | 3.06398 |

**Processed Peaks**

| Peak No | Name | Start RT (mins) | Max RT (mins) | End RT (mins) | Pk Height (mV) | % Height | Area (mV.secs) | % Area |
|---------|------|-----------------|---------------|---------------|----------------|----------|----------------|--------|
| 1       |      | 10.07           | 12.08         | 14.88         | 2.45017        | 0        | 268.568        | 100    |

**Figure S86.** GPC of the polymer from table 1, entry 5.

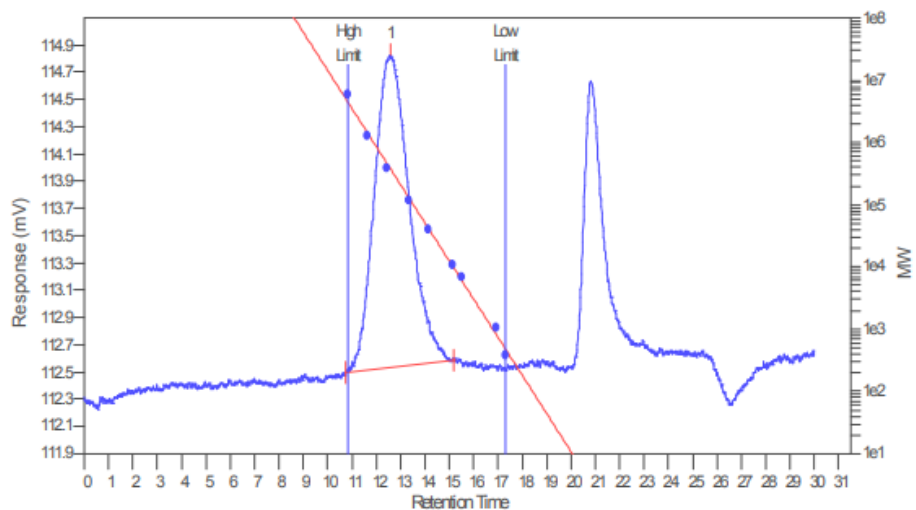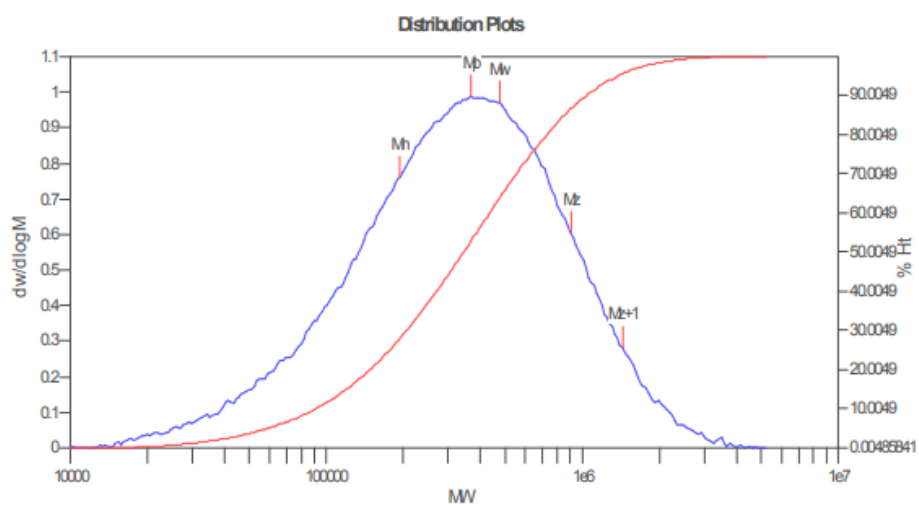

#### MW Averages

| Peak No | Mp     | Mn     | Mw     | Mz     | Mz+1    | Mv     | PD      |
|---------|--------|--------|--------|--------|---------|--------|---------|
| 1       | 367661 | 194236 | 475207 | 906238 | 1442344 | 425205 | 2.44654 |

#### Processed Peaks

| Peak No | Name | Start RT (mins) | Max RT (mins) | End RT (mins) | Pk Height (mV) | % Height | Area (mV.secs) | % Area |
|---------|------|-----------------|---------------|---------------|----------------|----------|----------------|--------|
| 1       |      | 10.72           | 12.60         | 15.18         | 2.28653        | 0        | 226.575        | 100    |

Figure S87. GPC of the polymer from table 1, entry 6.

1.1

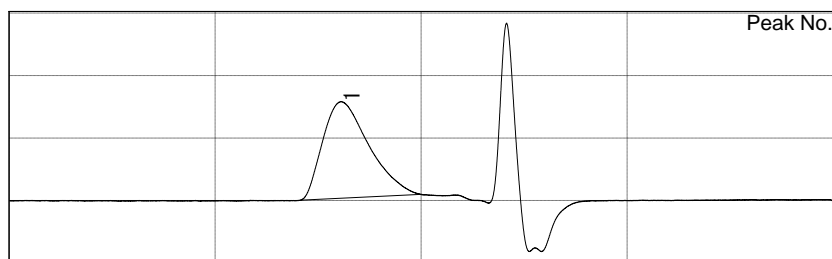

1.2

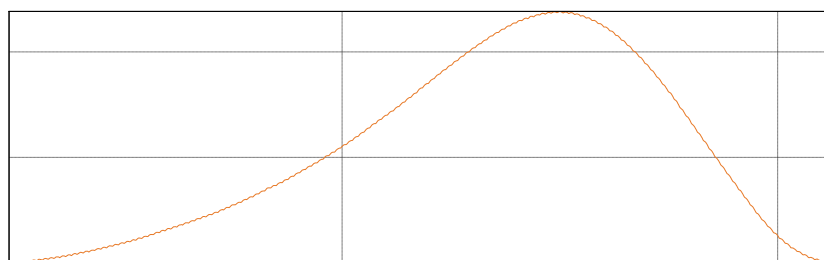

1.3

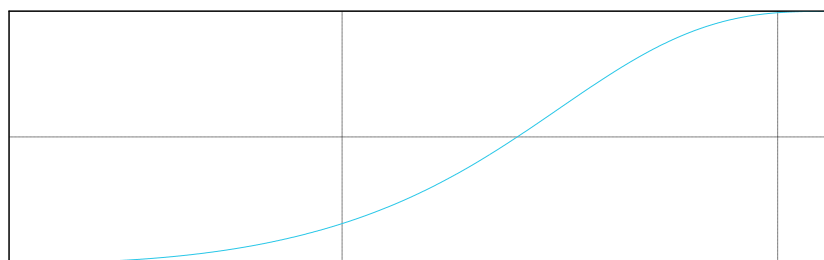

Result of molecular weight calculation (RI)

Peak 1 Base Peak

|               | [min]  | [mV]   | [mol]       | Mn      |        |
|---------------|--------|--------|-------------|---------|--------|
| Peak start    | 7.078  | 0.068  | 134,085     | Mw      | 30,044 |
| Peak top      | 8.048  | 15.848 | 31,590      | Mz      | 44,573 |
| Peak end      | 10.002 | 1.000  | 1,718       | Mz+1    | 57,169 |
|               |        |        |             | Mv      | 30,044 |
| Height [mV]   |        |        | 15.471      | Mp      | 31,590 |
| Area [mV*sec] |        |        | 1203.522    | Mz/Mw   | 1.484  |
| Area% [%]     |        |        | 100.000     | Mw/Mn   | 1.830  |
| [eta]         |        |        | 30044.05312 | Mz+1/Mw | 1.903  |

Result of molecular weight calculation (RI)

Total

|               | [min]  | [mV]   | [mol]       | Mn      |        |
|---------------|--------|--------|-------------|---------|--------|
| Peak start    | 7.078  | 0.068  | 134,085     | Mw      | 30,044 |
| Peak top      | 8.048  | 15.848 | 31,590      | Mz      | 44,573 |
| Peak end      | 10.002 | 1.000  | 1,718       | Mz+1    | 57,169 |
|               |        |        |             | Mv      | 30,044 |
| Height [mV]   |        |        | 15.471      | Mp      | 31,590 |
| Area [mV*sec] |        |        | 1203.522    | Mz/Mw   | 1.484  |
| Area% [%]     |        |        | 100.000     | Mw/Mn   | 1.830  |
| [eta]         |        |        | 30044.05312 | Mz+1/Mw | 1.903  |

Figure S88. GPC of the polymer from table 1, entry 10.

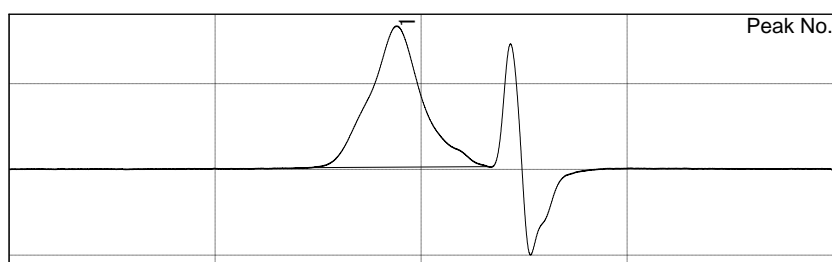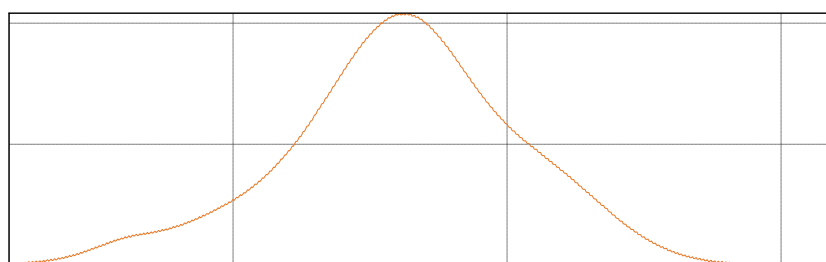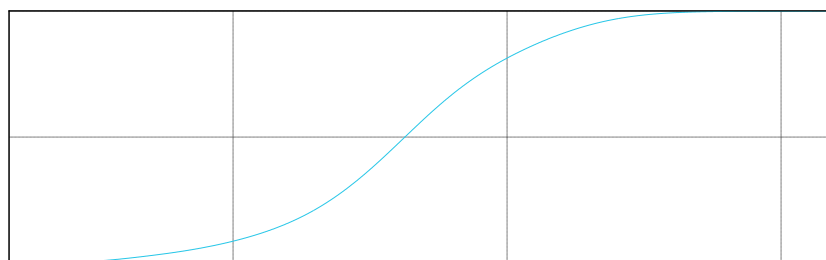

Result of molecular weight calculation (RI)

Peak 1 Base Peak

|               | [min]  | [mV]   | [mol]      | Mn      |        |
|---------------|--------|--------|------------|---------|--------|
| Peak start    | 7.003  | 0.203  | 154,886    | Mw      | 2,399  |
| Peak top      | 9.390  | 16.746 | 4,306      | Mz      | 6,632  |
| Peak end      | 11.617 | 0.324  | 152        | Mz+1    | 15,778 |
|               |        |        |            | Mv      | 34,744 |
| Height [mV]   |        |        | 16.480     | Mp      | 6,632  |
| Area [mV*sec] |        |        | 1457.361   | Mz/Mw   | 4,307  |
| Area% [%]     |        |        | 100.000    | Mw/Mn   | 2.379  |
| [eta]         |        |        | 6632.04971 | Mz+1/Mw | 2.765  |
|               |        |        |            |         | 5.239  |

Result of molecular weight calculation (RI)

Total

|               | [min]  | [mV]   | [mol]      | Mn      |        |
|---------------|--------|--------|------------|---------|--------|
| Peak start    | 7.003  | 0.203  | 154,886    | Mw      | 2,399  |
| Peak top      | 9.390  | 16.746 | 4,306      | Mz      | 6,632  |
| Peak end      | 11.617 | 0.324  | 152        | Mz+1    | 15,778 |
|               |        |        |            | Mv      | 34,744 |
| Height [mV]   |        |        | 16.480     | Mp      | 6,632  |
| Area [mV*sec] |        |        | 1457.361   | Mz/Mw   | 4,307  |
| Area% [%]     |        |        | 100.000    | Mw/Mn   | 2.379  |
| [eta]         |        |        | 6632.04971 | Mz+1/Mw | 2.765  |
|               |        |        |            |         | 5.239  |

Figure S89. GPC of the polymer from table 1, entry 11.

1.1

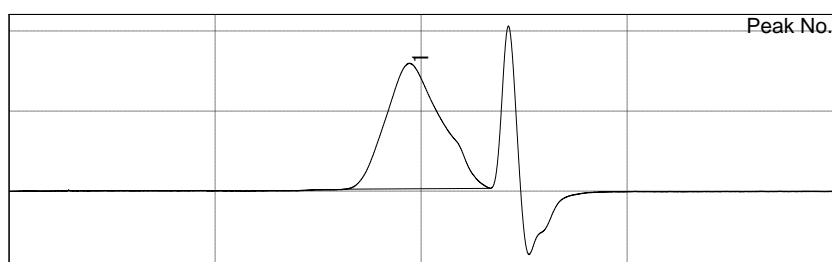

1.2

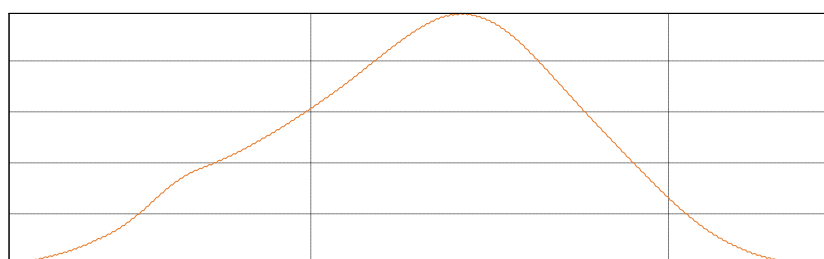

1.3

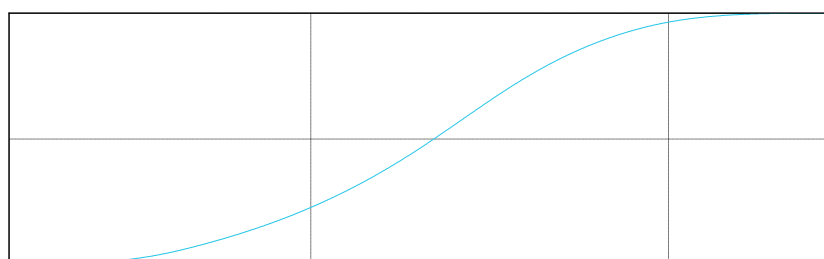

Result of molecular weight calculation (RI)

Peak 1 Base Peak

|               | [min]  | [mV]   | [mol]      |         |       |
|---------------|--------|--------|------------|---------|-------|
| Peak start    | 8.120  | 0.249  | 28,860     | Mn      | 1,331 |
| Peak top      | 9.720  | 15.990 | 2,627      | Mw      | 3,079 |
| Peak end      | 11.662 | 0.351  | 143        | Mz      | 5,778 |
|               |        |        |            | Mz+1    | 8,776 |
| Height [mV]   |        |        | 15.695     | Mv      | 3,079 |
| Area [mV*sec] |        |        | 1468.270   | Mp      | 2,628 |
| Area% [%]     |        |        | 100.000    | Mz/Mw   | 1.876 |
| [eta]         |        |        | 3079.47790 | Mw/Mn   | 2.314 |
|               |        |        |            | Mz+1/Mw | 2.850 |

Result of molecular weight calculation (RI)

Total

|               | [min]  | [mV]   | [mol]      |         |       |
|---------------|--------|--------|------------|---------|-------|
| Peak start    | 8.120  | 0.249  | 28,860     | Mn      | 1,331 |
| Peak top      | 9.720  | 15.990 | 2,627      | Mw      | 3,079 |
| Peak end      | 11.662 | 0.351  | 143        | Mz      | 5,778 |
|               |        |        |            | Mz+1    | 8,776 |
| Height [mV]   |        |        | 15.695     | Mv      | 3,079 |
| Area [mV*sec] |        |        | 1468.270   | Mp      | 2,628 |
| Area% [%]     |        |        | 100.000    | Mz/Mw   | 1.876 |
| [eta]         |        |        | 3079.47790 | Mw/Mn   | 2.314 |
|               |        |        |            | Mz+1/Mw | 2.850 |

Figure S90. GPC of the polymer from table 1, entry 12.



1.1

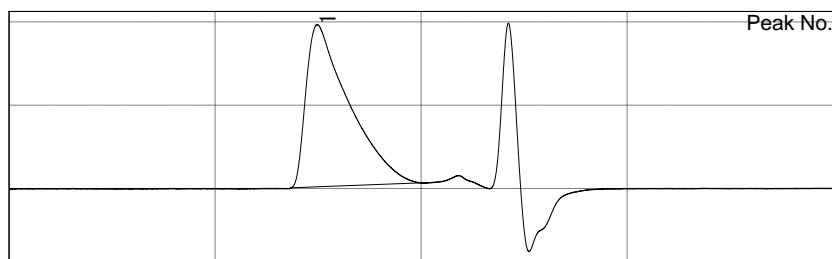

1.2

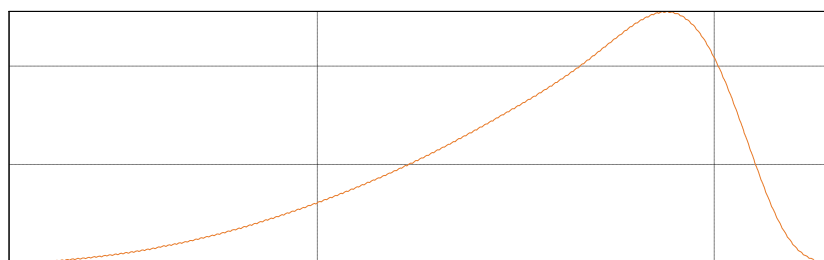

1.3

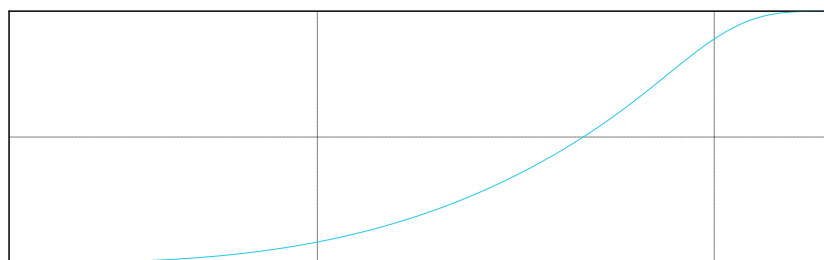

Result of molecular weight calculation (RI)

Peak 1 Base Peak

|               | [min]  | [mV]   | [mol]       | Mn      |        |
|---------------|--------|--------|-------------|---------|--------|
| Peak start    | 6.830  | 0.086  | 199,255     | Mw      | 52,450 |
| Peak top      | 7.473  | 19.687 | 76,022      | Mz      | 75,588 |
| Peak end      | 10.022 | 0.677  | 1,672       | Mz+1    | 91,441 |
| Height [mV]   |        |        | 19.482      | Mv      | 52,450 |
| Area [mV*sec] |        |        | 1406.282    | Mp      | 76,022 |
| Area% [%]     |        |        | 100.000     | Mz/Mw   | 1.441  |
| [eta]         |        |        | 52449.57864 | Mw/Mn   | 2.060  |
|               |        |        |             | Mz+1/Mw | 1.743  |

Result of molecular weight calculation (RI)

Total

|               | [min]  | [mV]   | [mol]       | Mn      |        |
|---------------|--------|--------|-------------|---------|--------|
| Peak start    | 6.830  | 0.086  | 199,255     | Mw      | 52,450 |
| Peak top      | 7.473  | 19.687 | 76,022      | Mz      | 75,588 |
| Peak end      | 10.022 | 0.677  | 1,672       | Mz+1    | 91,441 |
| Height [mV]   |        |        | 19.482      | Mv      | 52,450 |
| Area [mV*sec] |        |        | 1406.282    | Mp      | 76,022 |
| Area% [%]     |        |        | 100.000     | Mz/Mw   | 1.441  |
| [eta]         |        |        | 52449.57864 | Mw/Mn   | 2.060  |
|               |        |        |             | Mz+1/Mw | 1.743  |

Figure S91. GPC of the polymer from table 1, entry 13.

Figure S92

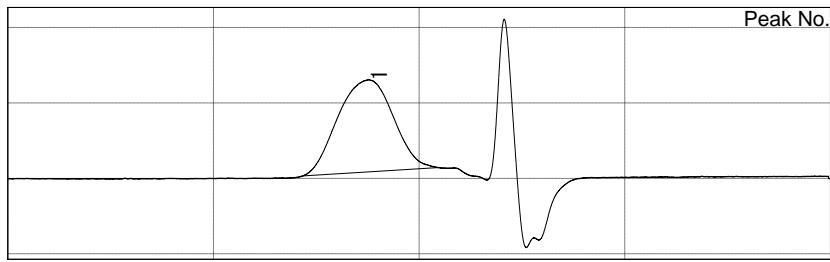

Figure S92

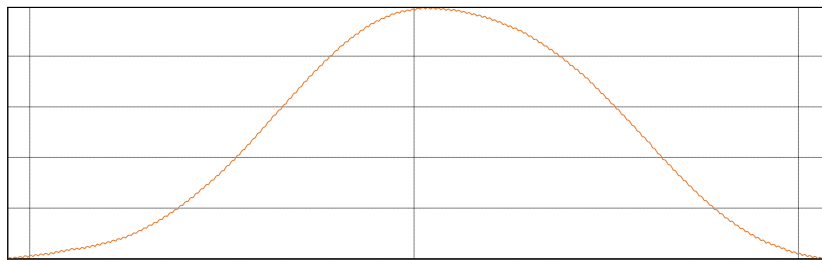

Figure S92

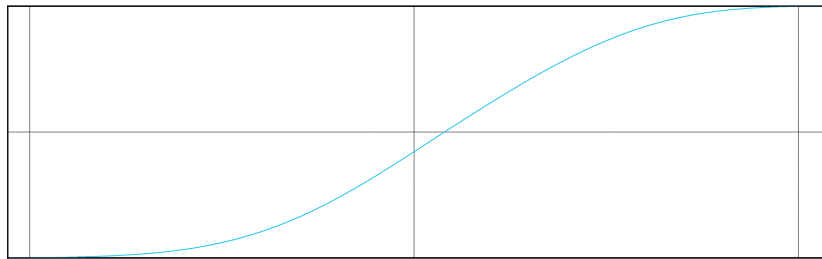

Result of molecular weight calculation (RI)

Peak 1 Base Peak

|               | [min]  | [mV]   | [mol]       | Mn      |        |
|---------------|--------|--------|-------------|---------|--------|
| Peak start    | 7.147  | 0.312  | 121,102     | Mw      | 16,855 |
| Peak top      | 8.765  | 13.089 | 10,856      | Mz      | 29,906 |
| Peak end      | 10.453 | 1.425  | 876         | Mz+1    | 43,908 |
|               |        |        |             | Mv      | 16,855 |
| Height [mV]   |        |        | 12.232      | Mp      | 10,512 |
| Area [mV*sec] |        |        | 1143.026    | Mz/Mw   | 1.774  |
| Area% [%]     |        |        | 100.000     | Mw/Mn   | 2.018  |
| [eta]         |        |        | 16855.27798 | Mz+1/Mw | 2.605  |

Result of molecular weight calculation (RI)

Total

|               | [min]  | [mV]   | [mol]       | Mn      |        |
|---------------|--------|--------|-------------|---------|--------|
| Peak start    | 7.147  | 0.312  | 121,102     | Mw      | 16,855 |
| Peak top      | 8.765  | 13.089 | 10,856      | Mz      | 29,906 |
| Peak end      | 10.453 | 1.425  | 876         | Mz+1    | 43,908 |
|               |        |        |             | Mv      | 16,855 |
| Height [mV]   |        |        | 12.232      | Mp      | 10,512 |
| Area [mV*sec] |        |        | 1143.026    | Mz/Mw   | 1.774  |
| Area% [%]     |        |        | 100.000     | Mw/Mn   | 2.018  |
| [eta]         |        |        | 16855.27798 | Mz+1/Mw | 2.605  |

Figure S92. GPC of the polymer from table 1, entry 14.

Figure S93

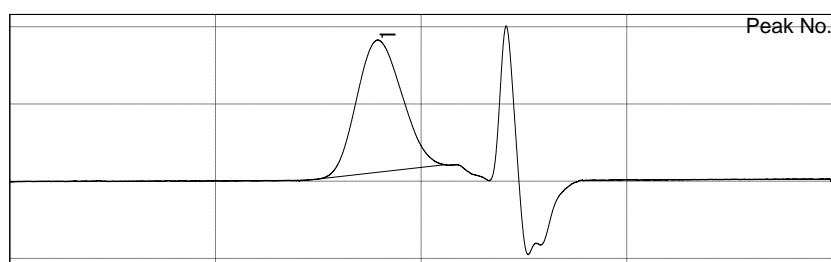

Figure S93

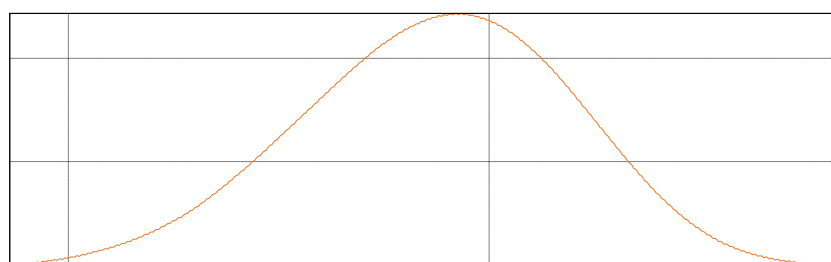

Figure S93

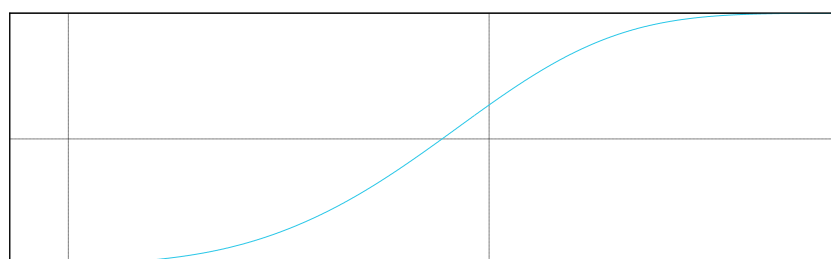

Result of molecular weight calculation (RI)

Peak 1 Base Peak

|               | [min]  | [mV]   | [mol]      | Mn      |        |
|---------------|--------|--------|------------|---------|--------|
| Peak start    | 7.560  | 0.322  | 65,407     | Mw      | 9,657  |
| Peak top      | 8.923  | 18.302 | 8,574      | Mz      | 14,999 |
| Peak end      | 10.580 | 2.143  | 726        | Mz+1    | 21,062 |
|               |        |        |            | Mv      | 9,657  |
| Height [mV]   |        |        | 17.158     | Mp      | 8,575  |
| Area [mV*sec] |        |        | 1306.359   | Mz/Mw   | 1.553  |
| Area% [%]     |        |        | 100.000    | Mw/Mn   | 1.692  |
| [eta]         |        |        | 9657.00982 | Mz+1/Mw | 2.181  |

Result of molecular weight calculation (RI)

Total

|               | [min]  | [mV]   | [mol]      | Mn      |        |
|---------------|--------|--------|------------|---------|--------|
| Peak start    | 7.560  | 0.322  | 65,407     | Mw      | 9,657  |
| Peak top      | 8.923  | 18.302 | 8,574      | Mz      | 14,999 |
| Peak end      | 10.580 | 2.143  | 726        | Mz+1    | 21,062 |
|               |        |        |            | Mv      | 9,657  |
| Height [mV]   |        |        | 17.158     | Mp      | 8,575  |
| Area [mV*sec] |        |        | 1306.359   | Mz/Mw   | 1.553  |
| Area% [%]     |        |        | 100.000    | Mw/Mn   | 1.692  |
| [eta]         |        |        | 9657.00982 | Mz+1/Mw | 2.181  |

Figure S93. GPC of the polymer from table 1, entry 15.

1.1

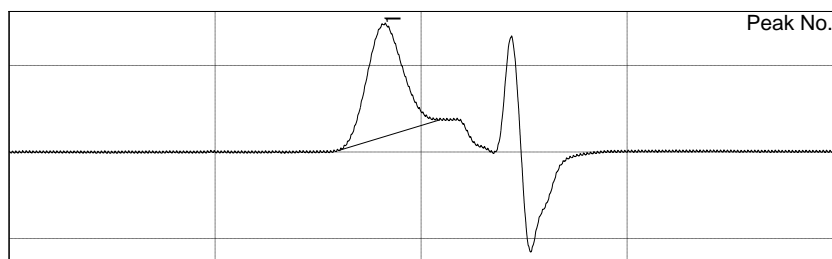

1.2

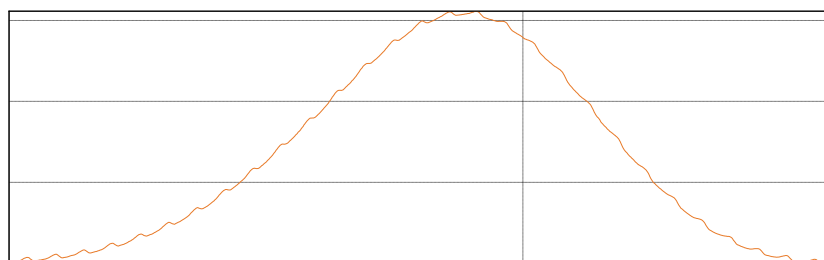

1.3

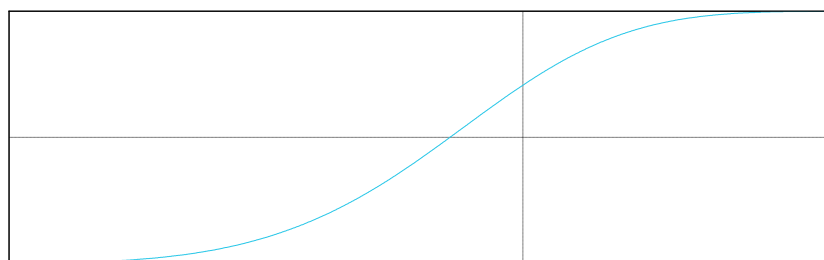

**Result of molecular weight calculation (RI)**

Peak 1 Base Peak

|               | [min]  | [mV]   | [mol]      | Mn      |        |
|---------------|--------|--------|------------|---------|--------|
| Peak start    | 7.995  | 0.177  | 38,427     | Mw      | 8,367  |
| Peak top      | 9.048  | 14.827 | 8,165      | Mz      | 11,225 |
| Peak end      | 10.427 | 3.677  | 1,075      | Mz+1    | 14,279 |
|               |        |        |            | Mv      | 8,367  |
| Height [mV]   |        |        | 13.134     | Mp      | 8,165  |
| Area [mV*sec] |        |        | 792.664    | Mz/Mw   | 1.342  |
| Area% [%]     |        |        | 100.000    | Mw/Mn   | 1.408  |
| [eta]         |        |        | 8366.60230 | Mz+1/Mw | 1.707  |

**Result of molecular weight calculation (RI)**

Total

|               | [min]  | [mV]   | [mol]      | Mn      |        |
|---------------|--------|--------|------------|---------|--------|
| Peak start    | 7.995  | 0.177  | 38,427     | Mw      | 8,367  |
| Peak top      | 9.048  | 14.827 | 8,165      | Mz      | 11,225 |
| Peak end      | 10.427 | 3.677  | 1,075      | Mz+1    | 14,279 |
|               |        |        |            | Mv      | 8,367  |
| Height [mV]   |        |        | 13.134     | Mp      | 8,165  |
| Area [mV*sec] |        |        | 792.664    | Mz/Mw   | 1.342  |
| Area% [%]     |        |        | 100.000    | Mw/Mn   | 1.408  |
| [eta]         |        |        | 8366.60230 | Mz+1/Mw | 1.707  |

**Figure S94.** GPC of the polymer from table 3, entry 1.

1.1

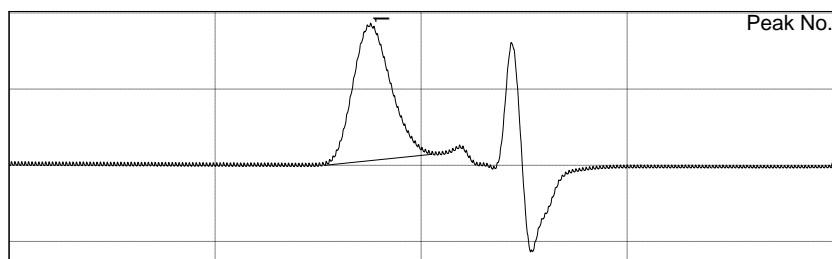

1.2

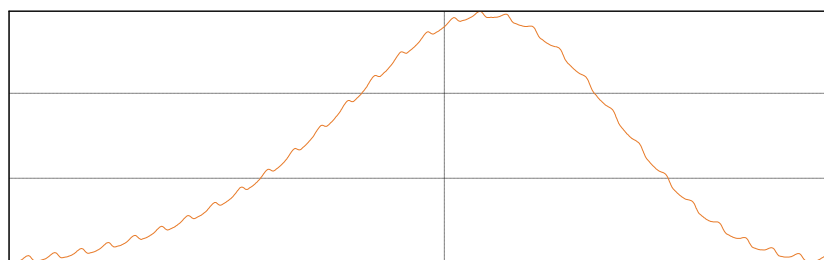

1.3

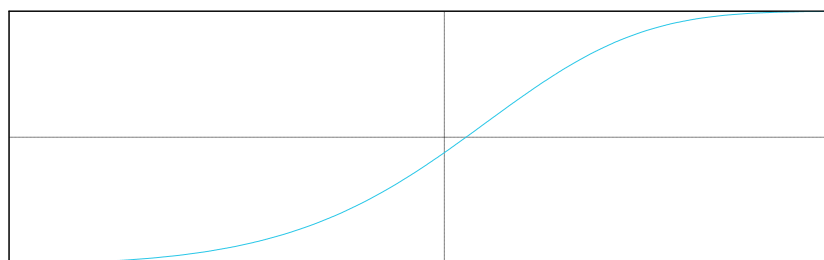

Result of molecular weight calculation (RI)

Peak 1 Base Peak

|               | [min]  | [mV]   | [mol]       | Mn      |        |
|---------------|--------|--------|-------------|---------|--------|
| Peak start    | 7.670  | 0.020  | 59,057      | Mw      | 12,777 |
| Peak top      | 8.773  | 18.681 | 11,761      | Mz      | 17,677 |
| Peak end      | 10.243 | 1.438  | 1,369       | Mz+1    | 22,907 |
|               |        |        |             | Mv      | 12,777 |
| Height [mV]   |        |        | 18.053      | Mp      | 11,761 |
| Area [mV*sec] |        |        | 1150.451    | Mz/Mw   | 1.384  |
| Area% [%]     |        |        | 100.000     | Mw/Mn   | 1.488  |
| [eta]         |        |        | 12776.88391 | Mz+1/Mw | 1.793  |

Result of molecular weight calculation (RI)

Total

|               | [min]  | [mV]   | [mol]       | Mn      |        |
|---------------|--------|--------|-------------|---------|--------|
| Peak start    | 7.670  | 0.020  | 59,057      | Mw      | 12,777 |
| Peak top      | 8.773  | 18.681 | 11,761      | Mz      | 17,677 |
| Peak end      | 10.243 | 1.438  | 1,369       | Mz+1    | 22,907 |
|               |        |        |             | Mv      | 12,777 |
| Height [mV]   |        |        | 18.053      | Mp      | 11,761 |
| Area [mV*sec] |        |        | 1150.451    | Mz/Mw   | 1.384  |
| Area% [%]     |        |        | 100.000     | Mw/Mn   | 1.488  |
| [eta]         |        |        | 12776.88391 | Mz+1/Mw | 1.793  |

Figure S95. GPC of the polymer from table 3, entry 2.

1.1

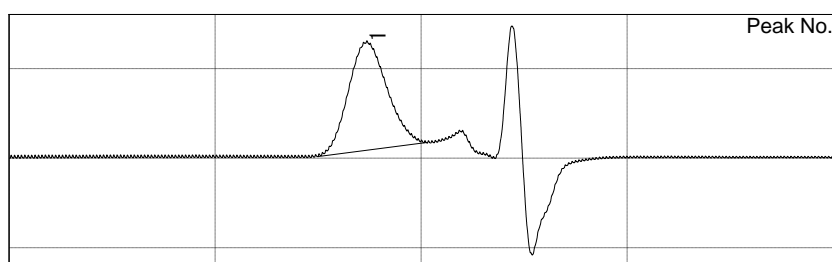

1.2

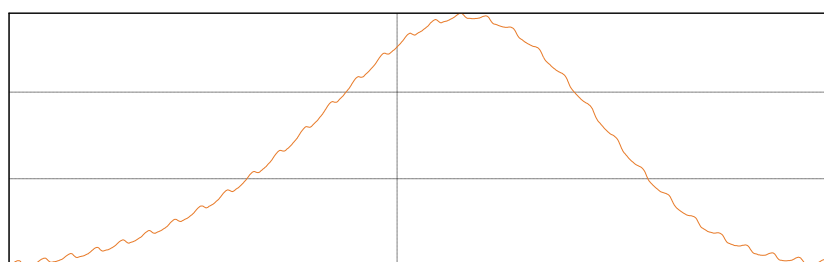

1.3

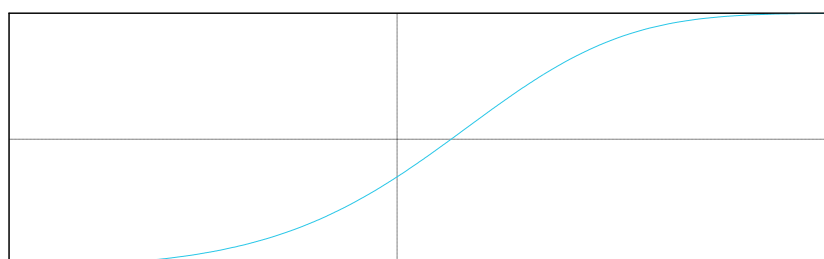

Result of molecular weight calculation (RI)

Peak 1 Base Peak

|               | [min]  | [mV]   | [mol]       |         |        |
|---------------|--------|--------|-------------|---------|--------|
| Peak start    | 7.493  | 0.189  | 76,469      | Mn      | 10,116 |
| Peak top      | 8.680  | 13.116 | 13,481      | Mw      | 15,112 |
| Peak end      | 10.122 | 1.750  | 1,636       | Mz      | 21,285 |
|               |        |        |             | Mz+1    | 28,192 |
| Height [mV]   |        |        | 12.222      | Mv      | 15,112 |
| Area [mV*sec] |        |        | 792.958     | Mp      | 13,448 |
| Area% [%]     |        |        | 100.000     | Mz/Mw   | 1.409  |
| [eta]         |        |        | 15112.06837 | Mw/Mn   | 1.494  |
|               |        |        |             | Mz+1/Mw | 1.866  |

Result of molecular weight calculation (RI)

Total

|               | [min]  | [mV]   | [mol]       |         |        |
|---------------|--------|--------|-------------|---------|--------|
| Peak start    | 7.493  | 0.189  | 76,469      | Mn      | 10,116 |
| Peak top      | 8.680  | 13.116 | 13,481      | Mw      | 15,112 |
| Peak end      | 10.122 | 1.750  | 1,636       | Mz      | 21,285 |
|               |        |        |             | Mz+1    | 28,192 |
| Height [mV]   |        |        | 12.222      | Mv      | 15,112 |
| Area [mV*sec] |        |        | 792.958     | Mp      | 13,448 |
| Area% [%]     |        |        | 100.000     | Mz/Mw   | 1.409  |
| [eta]         |        |        | 15112.06837 | Mw/Mn   | 1.494  |
|               |        |        |             | Mz+1/Mw | 1.866  |

Figure S96. GPC of the polymer from table 3, entry 4.

## Cirrus GPC Sample Peak Report

### Sample Details

Acquired: 2023/6/1 19:30:06

Batch Name: 20230601

Filename: E:\Cirrus Workbooks\JC\20230601-0013.cgrm

Concentration: 0.10 mg/ml

Injection Volume: 200.0 ul LIMS ID:

### MW Averages

Mp: 1852389

Mn: 1431658

Mv: 2026924

Mw:

2134794

Mz: 2883372

Mz+1: 3552334

PD: 1.4911

### Distribution Plots

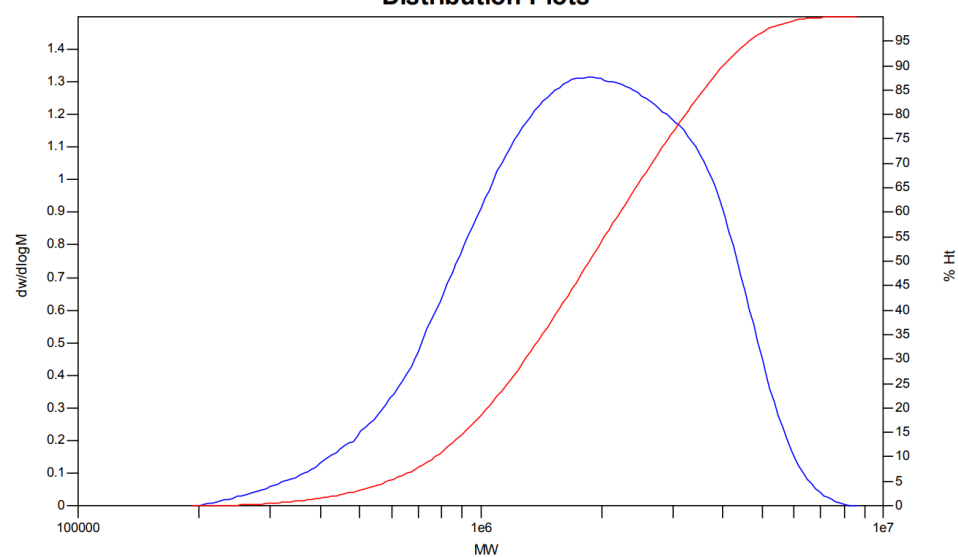

### Sample Peak Report

#### MW Ranges

| Range No | High Limit | Low Limit | %Area   |
|----------|------------|-----------|---------|
| 1        | 8612253    | 191450    | 100.000 |

Figure S97. GPC of the polymer from table 4, entry 1.

## Cirrus GPC Sample Peak Report

### Sample Details

Acquired: 2023/6/1 15:44:01

Batch Name: 20230601

Filename: E:\Cirrus Workbooks\JC\20230601-0008.cgrm

Concentration: 0.10 mg/ml

Injection Volume: 200.0 ul LIMS ID:

### MW Averages

Mp: 1075426

Mn: 947234

Mv: 1672383

Mw: 1837448

Mz: 3171400

Mz+1: 4496942

PD: 1.9398

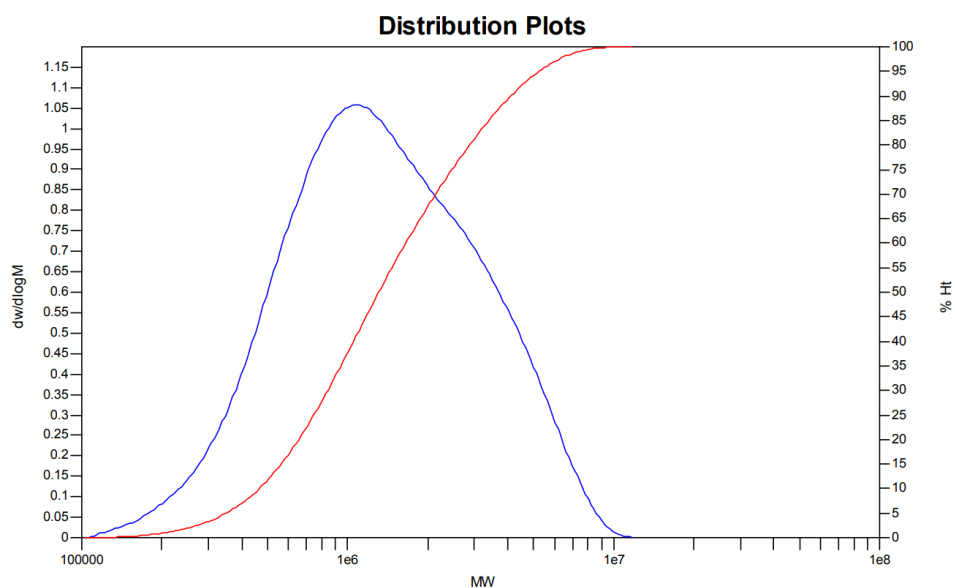

### Sample Peak Report

#### MW Ranges

| Range No | High Limit | Low Limit | %Area   |
|----------|------------|-----------|---------|
| 1        | 11710992   | 103538    | 100.000 |

**Figure S98.** GPC of the polymer from table 4, entry 2.



## Cirrus GPC Sample Peak Report

### Sample Details

Acquired: 2023/6/1 15:02:55

Batch Name: 20230601

Filename: E:\Cirrus Workbooks\JC\20230601-0007.cgrm

Concentration: 0.10 mg/ml

Injection Volume: 200.0 ul LIMS ID:

### MW Averages

Mp: 719505

Mn: 498967

Mv: 741361

Mw: 785604

Mz: 1101029

Mz+1: 1399359

PD: 1.5745

### Distribution Plots

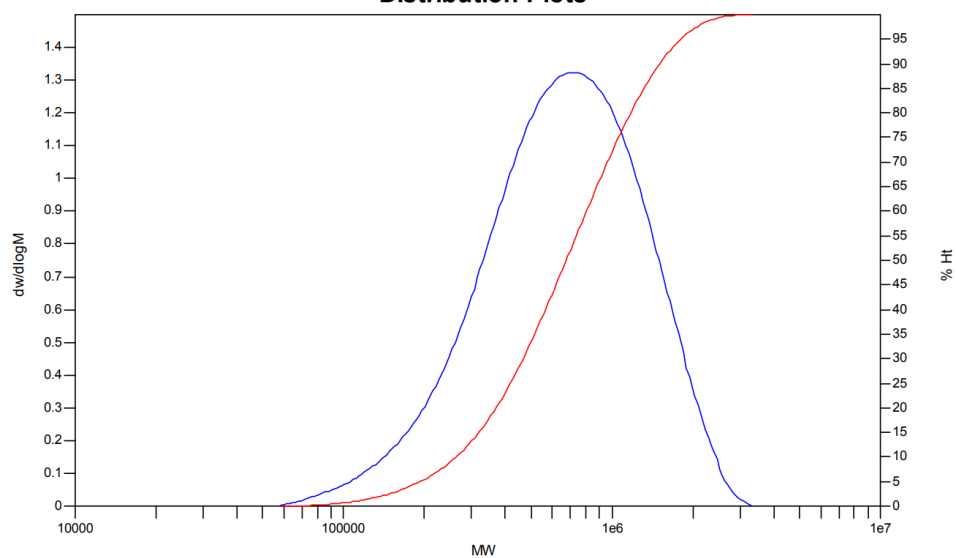

### Sample Peak Report

#### MW Ranges

| Range No | High Limit | Low Limit | %Area   |
|----------|------------|-----------|---------|
| 1        | 3345173    | 57334     | 100.000 |

**Figure S99.** GPC of the polymer from table 4, entry 3.

## Cirrus GPC Sample Peak Report

### Sample Details

Acquired: 2023/6/1 14:21:52

Batch Name: 20230601

Filename: E:\Cirrus Workbooks\JC\20230601-0006.cgrm

Concentration: 0.10 mg/ml

Injection Volume: 200.0 ul LIMS ID:

### MW Averages

Mp: 215473

Mn: 135327

Mv: 212856

Mw: 227386

Mz: 334198

Mz+1: 441881

PD: 1.6803

### Distribution Plots

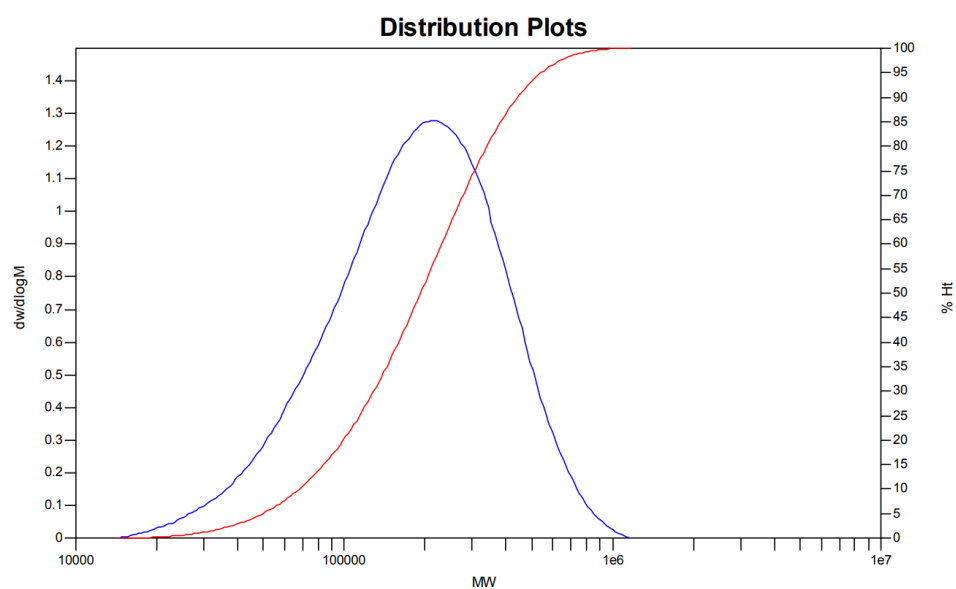

### Sample Peak Report

#### MW Ranges

| Range No | High Limit | Low Limit | %Area  |
|----------|------------|-----------|--------|
| 1        | 1154471    | 50000     | 94.921 |
| 2        | 50000      | 40000     | 2.208  |
| 3        | 40000      | 30000     | 1.661  |
| 4        | 30000      | 20000     | 1.040  |
| 5        | 20000      | 14551     | 0.171  |

Figure S100. GPC of the polymer from table 4, entry 4.

## Cirrus GPC Sample Peak Report

### Sample Details

Acquired: 2023/4/19 11:17:08

Batch Name: 20230419

Filename: E:\Cirrus Workbooks\JC\20230419-0003.cgrm

Concentration: 0.10 mg/ml

Injection Volume: 200.0 ul LIMS ID:

### MW Averages

Mp: 772389

Mn: 408859

Mv: 830305

Mw:

947114

Mz: 2423106

Mz+1: 5026942

PD: 2.3165

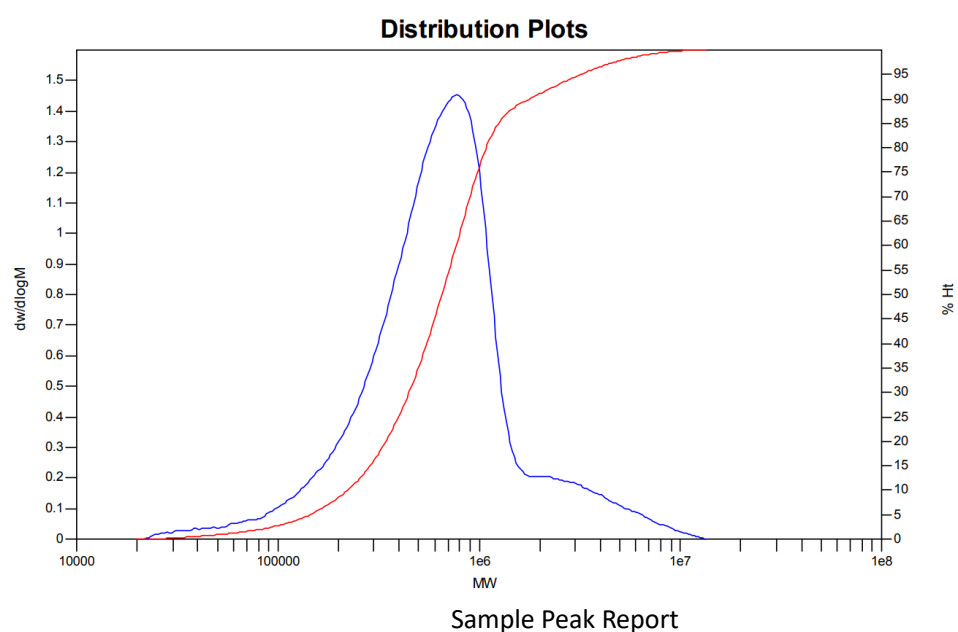

### MW Ranges

| Range | No       | High Limit | Low Limit | %Area             |
|-------|----------|------------|-----------|-------------------|
| 1     | 13495793 | 50000      | 99.099 2  | 50000 40000 0.346 |
| 3     | 40000    | 30000      | 0.356     |                   |
| 4     | 30000    | 20000      | 0.192     |                   |
| 5     | 20000    | 19787      | 0.008     |                   |

**Figure S101.** GPC of the polymer from table 4, entry 6.

## Cirrus GPC Sample Peak Report

### Sample Details

Acquired: 2023/4/19 10:39:16

Batch Name: 20230419

Filename: E:\Cirrus Workbooks\JC\20230419-0002.cgrm

Concentration: 0.10 mg/ml

Injection Volume: 200.0 ul LIMS ID:

### MW Averages

Mp: 437942

Mn: 299203

Mv: 538601

Mw: 601271

Mz: 1323979

Mz+1: 2820311

PD: 2.0096

### Distribution Plots

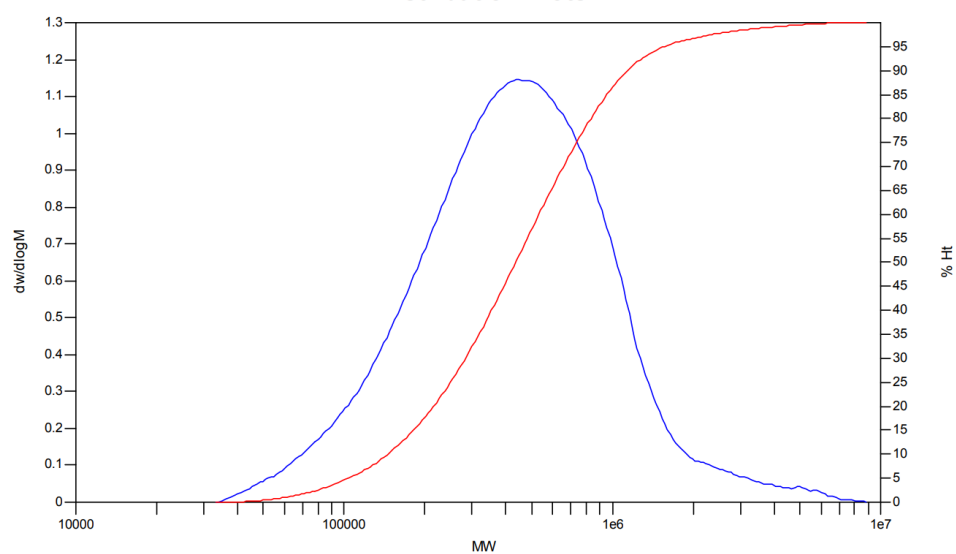

### Sample Peak Report

#### MW Ranges

| Range No | High Limit | Low Limit | %Area  |
|----------|------------|-----------|--------|
| 1        | 8818287    | 50000     | 99.572 |
| 2        | 50000      | 40000     | 0.365  |
| 3        | 40000      | 33286     | 0.062  |

Figure S102. GPC of the polymer from table 4, entry 7.

## Cirrus GPC Sample Peak Report

### Sample Details

Acquired: 2023/4/19 13:48:38

Batch Name: 20230419

Filename: E:\Cirrus Workbooks\JC\20230419-0007.cgrm

Concentration: 0.10 mg/ml

Injection Volume: 200.0 ul LIMS ID:

### MW Averages

Mp: 44205

Mn: 26677

Mv: 45715

Mw:

49120

Mz: 73918

Mz+1: 98133

PD: 1.8413

### Distribution Plots

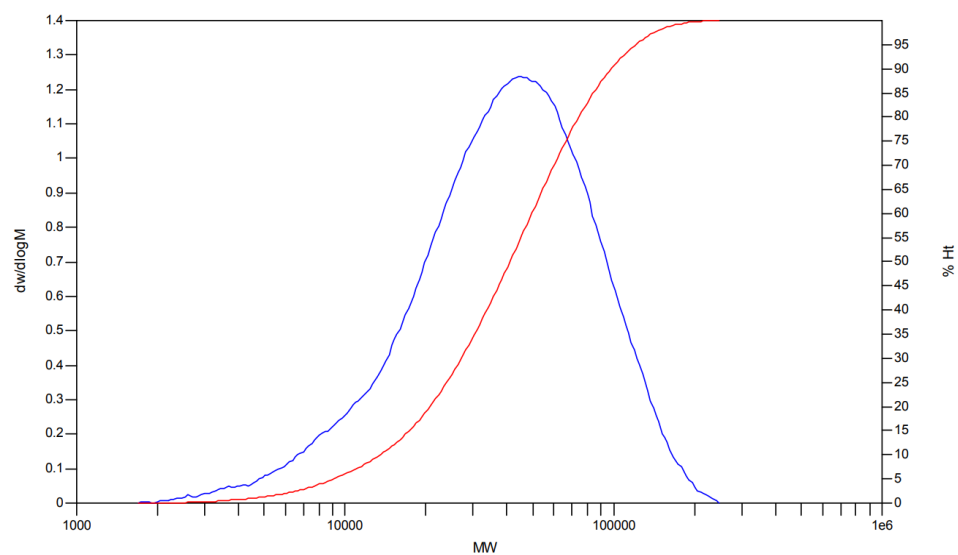

### Sample Peak Report

### MW Ranges

|   | Range  | No    | High Limit | Low Limit | %Area |
|---|--------|-------|------------|-----------|-------|
| 1 | 248312 | 50000 | 39.432     |           |       |
| 2 | 50000  | 40000 | 11.912     |           |       |
| 3 | 40000  | 30000 | 14.231     |           |       |
| 4 | 30000  | 20000 | 15.517     |           |       |
| 5 | 20000  | 10000 | 12.925     |           |       |
| 6 | 10000  | 1692  | 5.984      |           |       |

Figure S103. GPC of the polymer from table 4, entry 8.

## Cirrus GPC Sample Peak Report

### Sample Details

Acquired: 2023/6/1 16:25:04

Batch Name: 20230601

Filename: E:\Cirrus Workbooks\JC\20230601-0009.cgrm

Concentration: 0.10 mg/ml

Injection Volume: 200.0 ul LIMS ID:

### MW Averages

Mp: 44205

Mn: 24832

Mv: 41578

Mw:

44627

Mz: 66995

Mz+1: 89649

PD: 1.7972

### Distribution Plots

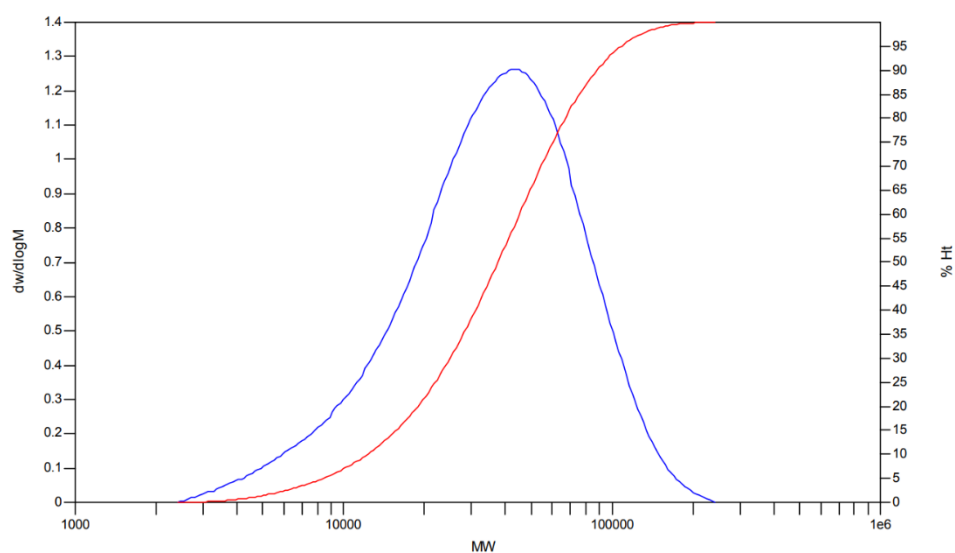

### Sample Peak Report

### MW Ranges

| Range | No     | High Limit | Low Limit | %Area |
|-------|--------|------------|-----------|-------|
| 1     | 242510 | 50000      | 34.527    |       |
| 2     | 50000  | 40000      | 12.161    |       |
| 3     | 40000  | 30000      | 14.930    |       |
| 4     | 30000  | 20000      | 16.601    |       |
| 5     | 20000  | 10000      | 14.797    |       |
| 6     | 10000  | 2413       | 6.985     |       |

Figure S104. GPC of the polymer from table 4, entry 9.

## Cirrus GPC Sample Peak Report

### Sample Details

Acquired: 2023/4/19 13:10:46

Batch Name: 20230419

Filename: E:\Cirrus Workbooks\JC\20230419-0006.cgrm

Concentration: 0.10 mg/ml

Injection Volume: 200.0 ul LIMS ID:

### MW Averages

Mp: 12331

Mn: 6787

Mv: 11469

Mw:

12332

Mz: 18517

Mz+1: 24249

PD: 1.8170

### Distribution Plots

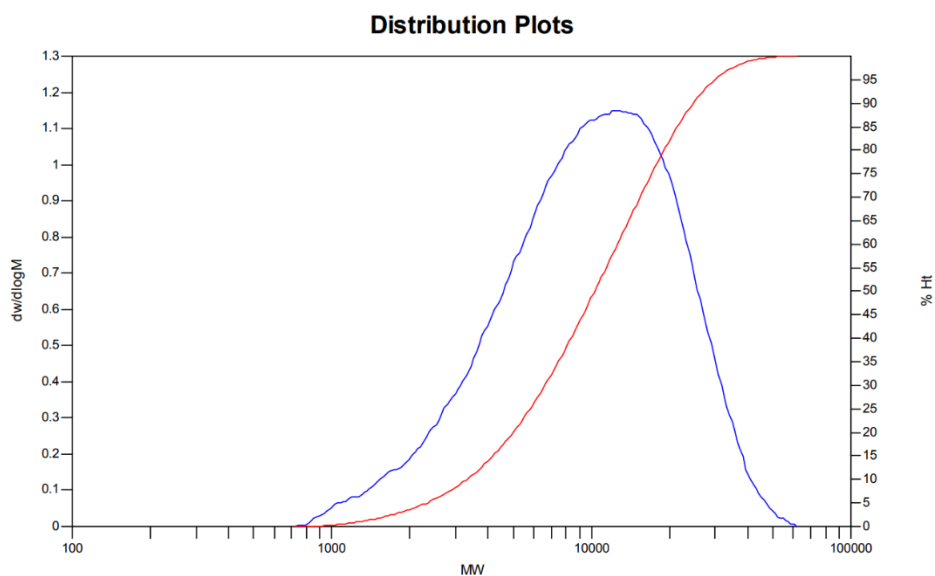

### Sample Peak Report

### MW Ranges

|   | Range | No    | High Limit | Low Limit | %Area |
|---|-------|-------|------------|-----------|-------|
| 1 | 61548 | 50000 | 0.186      |           |       |
| 2 | 50000 | 40000 | 0.890      |           |       |
| 3 | 40000 | 30000 | 3.872      |           |       |
| 4 | 30000 | 20000 | 12.926     |           |       |
| 5 | 20000 | 10000 | 33.478     |           |       |
| 6 | 10000 | 722   | 48.648     |           |       |

**Figure S105.** GPC of the polymer from table 4, entry 10.

## Cirrus GPC Sample Peak Report

### Sample Details

Acquired: 2023/6/14 18:09:23

Batch Name: 20230614

Filename: E:\Cirrus Workbooks\JC\20230614-0011.cgrm

Concentration: 0.10 mg/ml

Injection Volume: 200.0 ul LIMS ID:

### MW Averages

Mp: 6828

Mn: 4587

Mv: 9320

Mw:

10536

Mz: 21736

Mz+1: 35063

PD: 2.2969

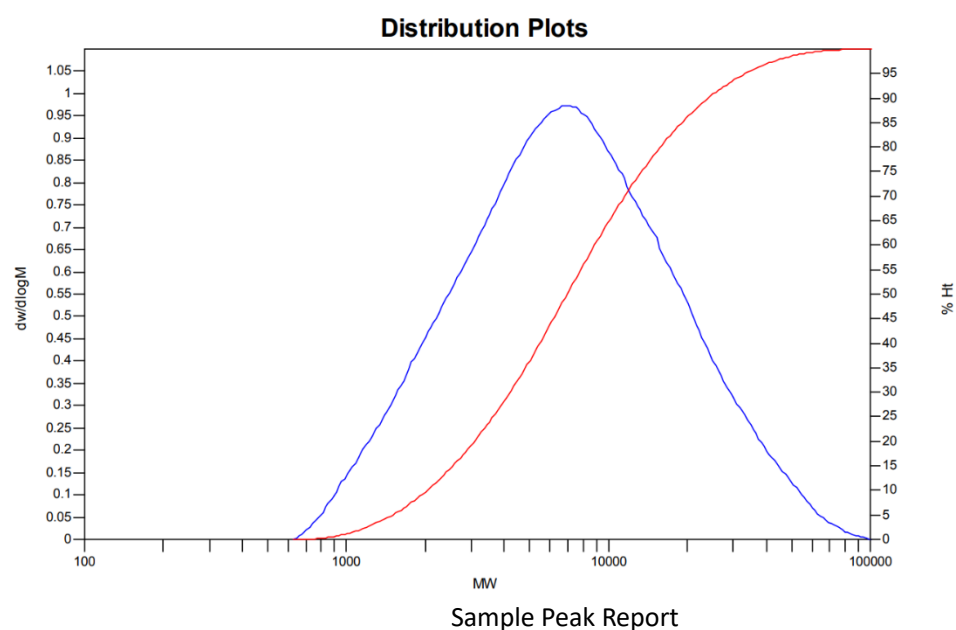

### MW Ranges

| Range | No     | High Limit | Low Limit | %Area |
|-------|--------|------------|-----------|-------|
| 1     | 101119 | 50000      | 1.450     |       |
| 2     | 50000  | 40000      | 1.620     |       |
| 3     | 40000  | 30000      | 3.302     |       |
| 4     | 30000  | 20000      | 7.469     |       |
| 5     | 20000  | 10000      | 21.395    |       |
| 6     | 10000  | 627        | 64.763    |       |

**Figure S106.** GPC of the polymer from table 4, entry 11.



## Cirrus GPC Sample Peak Report

### Sample Details

Acquired: 2023/4/12 12:49:29

Batch Name: 20230412

Filename: E:\Cirrus Workbooks\JC\20230412-0005.cgrm

Concentration: 0.10 mg/ml

Injection Volume: 200.0 ul LIMS ID:

### MW Averages

Mp: 2780

Mn: 2210

Mv: 4201

Mw:

4887

Mz: 13587

Mz+1: 26704

PD: 2.2113

### Distribution Plots

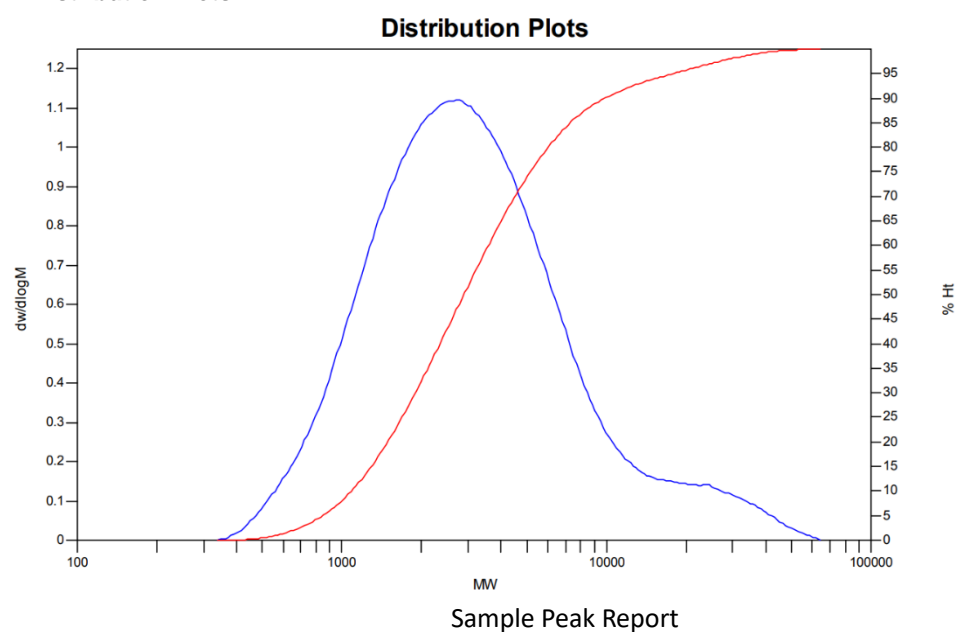

### MW Ranges

| Range | No    | High Limit | Low Limit | %Area |
|-------|-------|------------|-----------|-------|
| 1     | 64528 | 50000      | 0.178     |       |
| 2     | 50000 | 40000      | 0.497     |       |
| 3     | 40000 | 30000      | 1.210     |       |
| 4     | 30000 | 20000      | 2.364     |       |
| 5     | 20000 | 10000      | 5.520     |       |
| 6     | 10000 | 339        | 90.230    |       |

**Figure S107.** GPC of the polymer from table 4, entry 12.

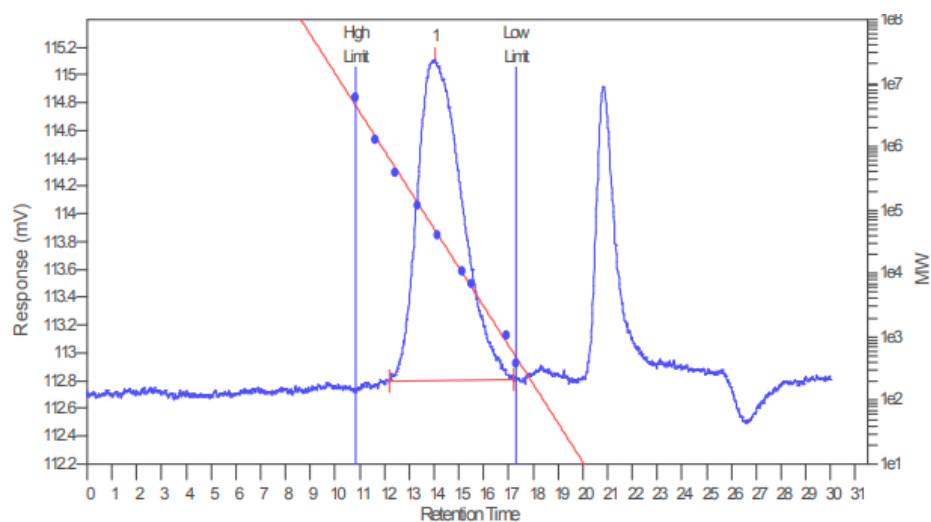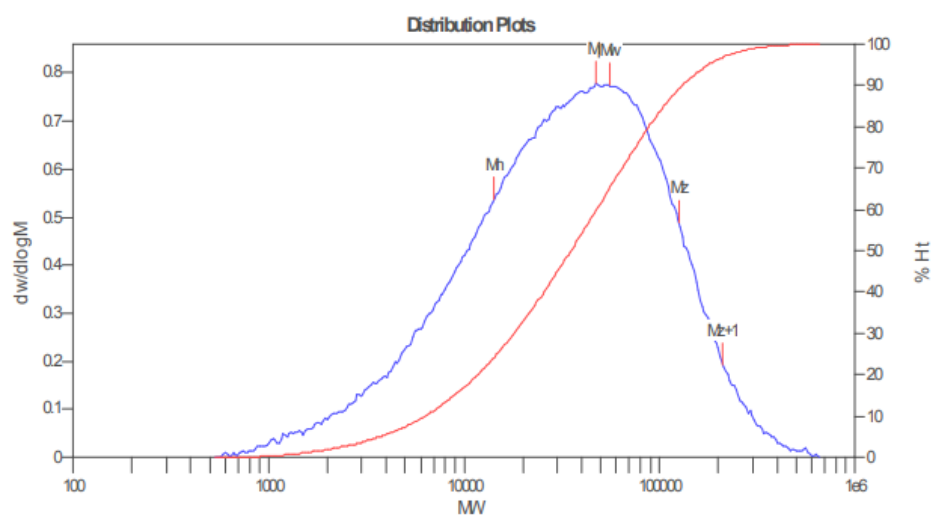

**MW Averages**

| Peak No | Mp    | Mn    | Mw    | Mz     | Mz+1   | Mv    | PD     |
|---------|-------|-------|-------|--------|--------|-------|--------|
| 1       | 47586 | 14305 | 55572 | 125868 | 211353 | 47757 | 3.8848 |

**Processed Peaks**

| Peak No | Name | Start RT (mins) | Max RT (mins) | End RT (mins) | Pk Height (mV) | % Height | Area (mV.secs) | % Area |
|---------|------|-----------------|---------------|---------------|----------------|----------|----------------|--------|
| 1       |      | 12.18           | 14.05         | 17.23         | 2.31983        | 0        | 291.554        | 100    |

**Figure S108.** GPC of the polymer from table 4, entry 13.

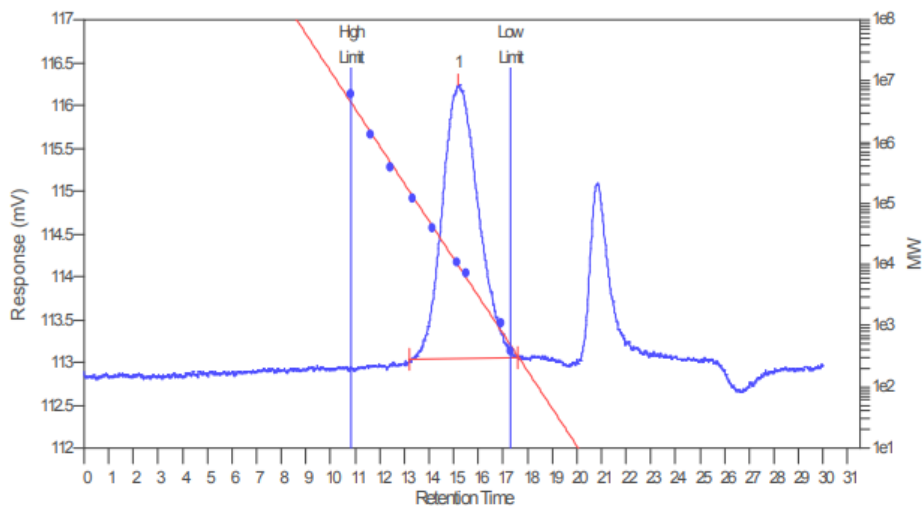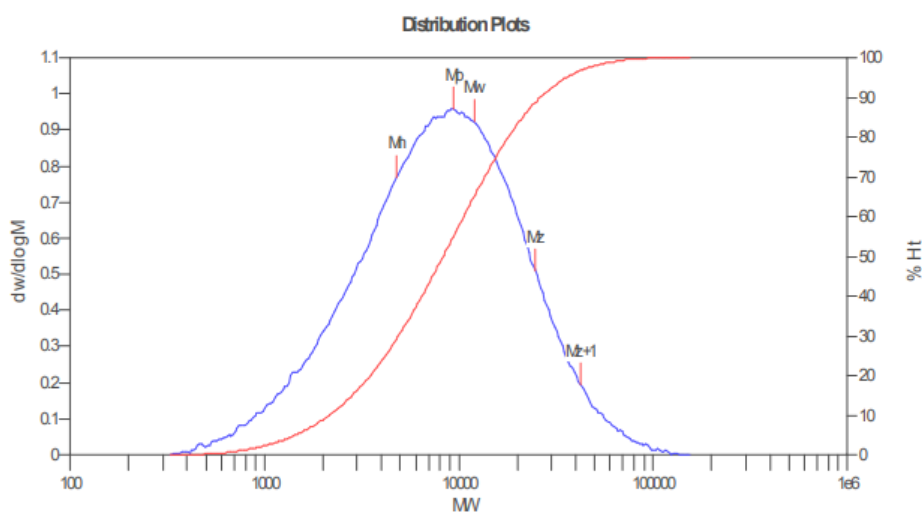

**MW Averages**

| Peak No | Mp   | Mn   | Mw    | Mz    | Mz+1  | Mv    | PD      |
|---------|------|------|-------|-------|-------|-------|---------|
| 1       | 9402 | 4783 | 12014 | 24795 | 42367 | 10637 | 2.51181 |

**Processed Peaks**

| Peak No | Name | Start RT (mins) | Max RT (mins) | End RT (mins) | Pk Height (mV) | % Height | Area (mV.secs) | % Area |
|---------|------|-----------------|---------------|---------------|----------------|----------|----------------|--------|
| 1       |      | 13.22           | 15.20         | 17.58         | 3.20768        | 0        | 327.954        | 100    |

**Figure S109.** GPC of the polymer from table 4, entry 14.

## Cirrus GPC Sample Peak Report

### Sample Details

Acquired: 2023/4/12 13:27:21

Batch Name: 20230412

Filename: E:\Cirrus Workbooks\JC\20230412-0006.cgrm

Concentration: 0.10 mg/ml

Injection Volume: 200.0 ul LIMS ID:

### MW Averages

Mp: 5021

Mn: 3162

Mv: 5168

Mw:

5610

Mz: 9428

Mz+1: 14793

PD: 1.7742

### Distribution Plots

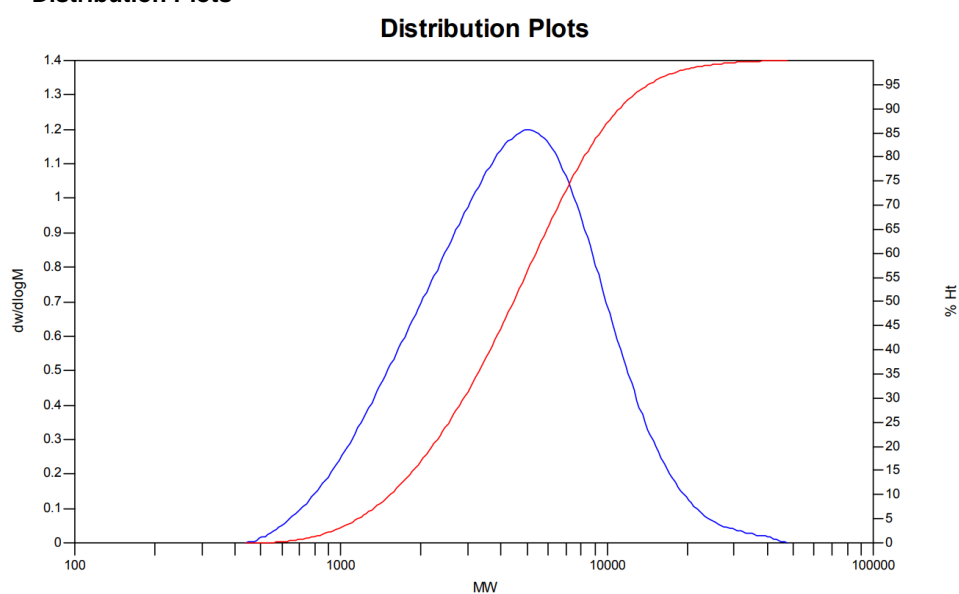

### Sample Peak Report

### MW Ranges

| Range | No    | High Limit | Low Limit | %Area |
|-------|-------|------------|-----------|-------|
| 1     | 47454 | 40000      | 0.074     |       |
| 2     | 40000 | 30000      | 0.357     |       |
| 3     | 30000 | 20000      | 1.327     |       |
| 4     | 20000 | 10000      | 11.191    |       |
| 5     | 10000 | 439        | 87.052    |       |

**Figure S110.** GPC of the polymer from table 4, entry 15.

## Cirrus GPC Sample Peak Report

### Sample Details

Acquired: 2023/6/1 18:49:03

Batch Name: 20230601

Filename: E:\Cirrus Workbooks\JC\20230601-0012.cgrm

Concentration: 0.10 mg/ml

Injection Volume: 200.0 ul LIMS ID:

### MW Averages

Mp: 70928

Mn: 39408

Mv: 70548

Mw:

76640

Mz: 122170

Mz+1: 166295

PD: 1.9448

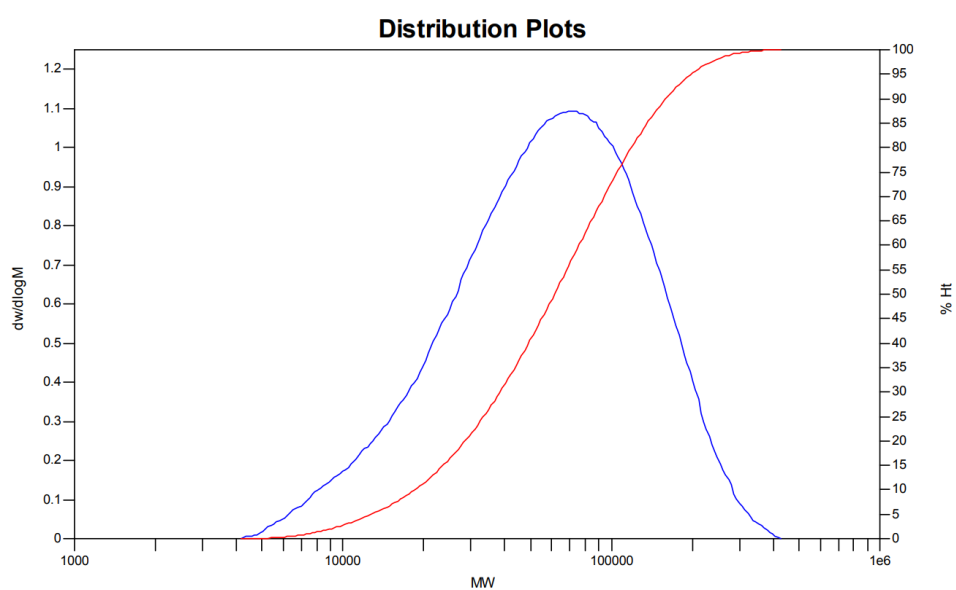

### Sample Peak Report

### MW Ranges

| Range | No     | High Limit | Low Limit | %Area |
|-------|--------|------------|-----------|-------|
| 1     | 427710 | 50000      | 59.264    |       |
| 2     | 50000  | 40000      | 9.220     |       |
| 3     | 40000  | 30000      | 10.036    |       |
| 4     | 30000  | 20000      | 10.075    |       |
| 5     | 20000  | 10000      | 8.650     |       |
| 6     | 10000  | 4156       | 2.755     |       |

**Figure S111.** GPC of the polymer from table 5, entry 1.

## Cirrus GPC Sample Peak Report

### Sample Details

Acquired: 2023/6/14 13:21:48

Batch Name: 20230614

Filename: E:\Cirrus Workbooks\JC\20230614-0004.cgrm

Concentration: 0.10 mg/ml

Injection Volume: 200.0 ul LIMS ID:

### MW Averages

Mp: 48589

Mn: 26786

Mv: 48355

Mw:

52602

Mz: 85797

Mz+1: 122998

PD: 1.9638

### Distribution Plots

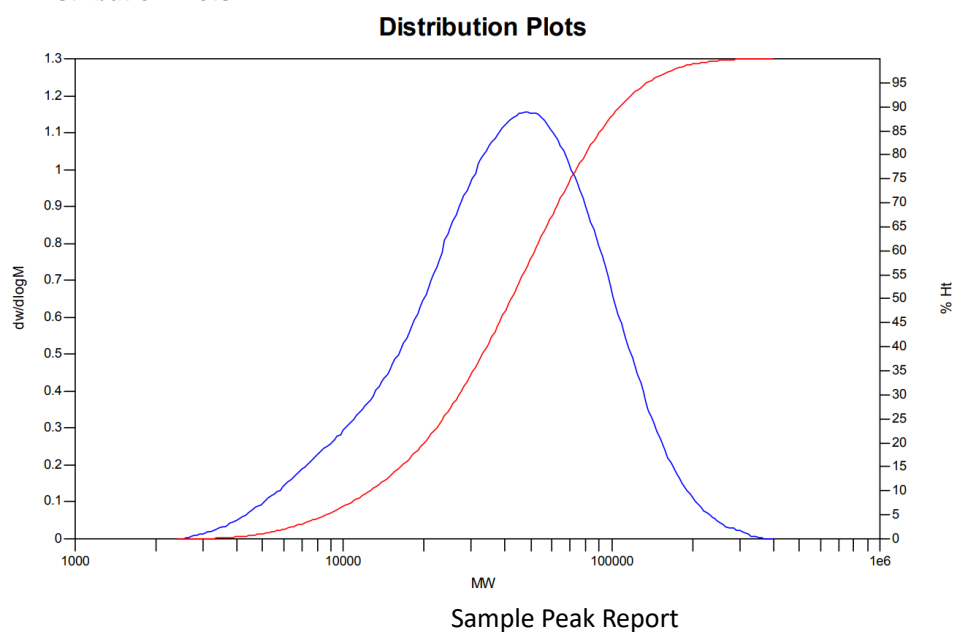

### MW Ranges

| Range | No     | High Limit | Low Limit | %Area |
|-------|--------|------------|-----------|-------|
| 1     | 398426 | 50000      | 41.534    |       |
| 2     | 50000  | 40000      | 11.072    |       |
| 3     | 40000  | 30000      | 13.111    |       |
| 4     | 30000  | 20000      | 14.234    |       |
| 5     | 20000  | 10000      | 13.268    |       |
| 6     | 10000  | 2413       | 6.781     |       |

**Figure S112.** GPC of the polymer from table 5, entry 2.

## Cirrus GPC Sample Peak Report

### Sample Details

Acquired: 2023/5/27 14:28:17

Batch Name: 20230527

Filename: E:\Cirrus Workbooks\JC\20230527-0007.cgrm

Concentration: 0.10 mg/ml

Injection Volume: 200.0 ul LIMS ID:

### MW Averages

Mp: 57334

Mn: 32016

Mv: 65990

Mw: 73229

Mz: 134248

Mz+1: 207389

PD: 2.2873

### Distribution Plots

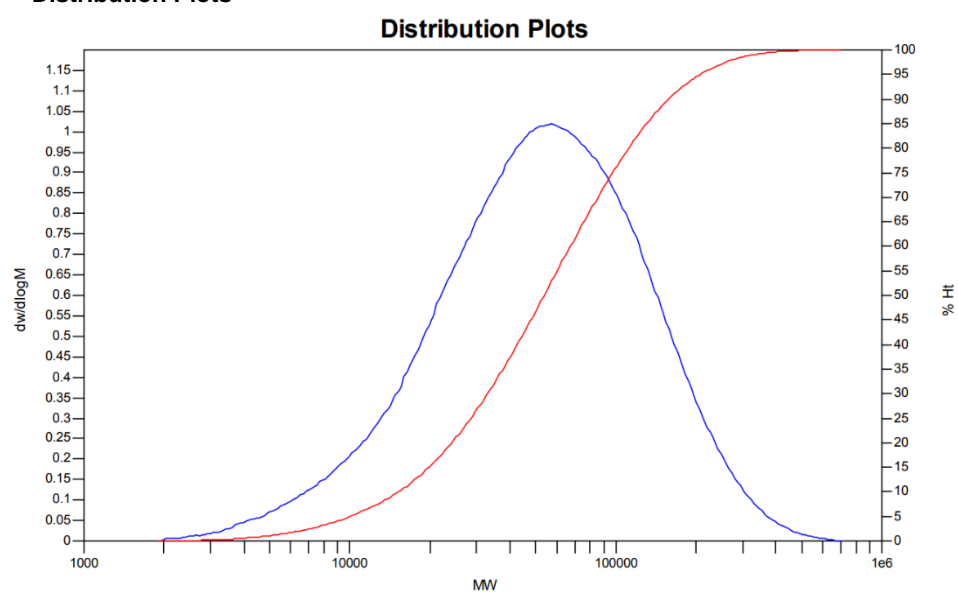

### MW Ranges

| Range | NoHigh Limit | Low Limit | %Area  |
|-------|--------------|-----------|--------|
| 1     | 702694       | 50000     | 53.160 |
| 2     | 50000        | 40000     | 9.433  |
| 3     | 40000        | 30000     | 10.682 |
| 4     | 30000        | 20000     | 11.541 |
| 5     | 20000        | 10000     | 10.256 |
| 6     | 10000        | 1905      | 4.929  |

**Figure S113.** GPC of the polymer from table 5, entry 5.

## Cirrus GPC Sample Peak Report

### Sample Details

Acquired: 2023/5/27 12:25:03

Batch Name: 20230527

Filename: E:\Cirrus Workbooks\JC\20230527-0004.cgrm

Concentration: 0.10 mg/ml

Injection Volume: 200.0 ul LIMS ID:

### MW Averages

Mp: 53408

Mn: 24439

Mv: 50248

Mw: 55265

Mz: 92628

Mz+1: 127521

PD: 2.2613

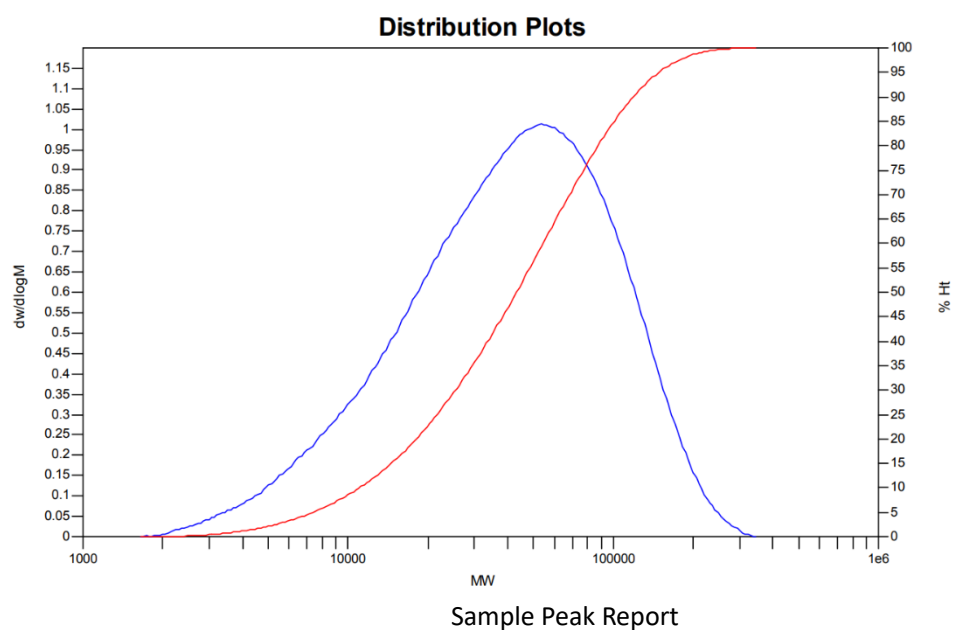

### MW Ranges

| Range No | High Limit | Low Limit | %Area  |
|----------|------------|-----------|--------|
| 1        | 345734     | 50000     | 43.613 |
| 2        | 50000      | 40000     | 9.506  |
| 3        | 40000      | 30000     | 11.146 |
| 4        | 30000      | 20000     | 13.044 |
| 5        | 20000      | 10000     | 14.104 |
| 6        | 10000      | 1653      | 8.587  |

**Figure S114.** GPC of the polymer from table 5, entry 6.



#### 4. X-ray Crystallography

CCDC numbers of complexes **Pd2**, **Ni4** and **Pd4** are **2280677**, **2280679** and **2280680**, respectively.

**Table S1.** Crystallographic and structural refinement data for **Pd2**, **Ni4** and **Pd4**.

| Identification code                         | <b>Pd2</b>                                          | <b>Ni4</b>                                                                                                          | <b>Pd4</b>                                                         |
|---------------------------------------------|-----------------------------------------------------|---------------------------------------------------------------------------------------------------------------------|--------------------------------------------------------------------|
| Empirical formula                           | C <sub>45</sub> H <sub>61</sub> ClN <sub>2</sub> Pd | C <sub>94</sub> H <sub>94</sub> Br <sub>2</sub> N <sub>2</sub> NiO <sub>2</sub><br>•CH <sub>2</sub> Cl <sub>2</sub> | C <sub>95</sub> H <sub>97</sub> ClN <sub>2</sub> O <sub>2</sub> Pd |
| Formula weight                              | 771.80                                              | 1587.17                                                                                                             | 1440.59                                                            |
| Temperature/K                               | 298(2) K                                            | 298(2) K                                                                                                            | 293(2) K                                                           |
| Crystal system                              | Monoclinic                                          | Triclinic                                                                                                           | Triclinic                                                          |
| Space group                                 | P 2 <sub>1</sub> /n                                 | P-1                                                                                                                 | P -1                                                               |
| a/Å                                         | 14.8764(13) Å                                       | 12.5341(12) Å                                                                                                       | 13.7030(13) Å                                                      |
| b/Å                                         | 17.0627(18) Å                                       | 14.1985(14) Å                                                                                                       | 16.3525(15) Å                                                      |
| c/Å                                         | 19.043(2) Å                                         | 24.945(3) Å                                                                                                         | 18.4107(17) Å                                                      |
| α/°                                         | 90°                                                 | 99.731(3)°                                                                                                          | 86.973(3)°                                                         |
| β/°                                         | 95.432(2)°                                          | 93.888(2)°                                                                                                          | 74.385(2)°                                                         |
| γ/°                                         | 90°                                                 | 110.972(4)°                                                                                                         | 86.344(3)°                                                         |
| Volume/Å <sup>3</sup>                       | 4812.0(9) Å <sup>3</sup>                            | 4045.7(7) Å <sup>3</sup>                                                                                            | 3962.4(6) Å <sup>3</sup>                                           |
| Z                                           | 4                                                   | 2                                                                                                                   | 2                                                                  |
| ρ <sub>calc</sub> /cm <sup>3</sup>          | 1.065 Mg/m <sup>3</sup>                             | 1.303 Mg/m <sup>3</sup>                                                                                             | 1.207 Mg/m <sup>3</sup>                                            |
| μ/mm <sup>-1</sup>                          | 0.468 mm <sup>-1</sup>                              | 1.344 mm <sup>-1</sup>                                                                                              | 0.318 mm <sup>-1</sup>                                             |
| F(000)                                      | 1632                                                | 1656                                                                                                                | 1520                                                               |
| Crystal size/mm <sup>3</sup>                | 0.430 x 0.400 x 0.320 mm <sup>3</sup>               | 0.30 x 0.13 x 0.09 mm <sup>3</sup>                                                                                  | 0.430 x 0.380 x 0.210 mm <sup>3</sup>                              |
| θ min-max/°                                 | 2.047 to 25.020°                                    | 1.84 to 25.02°                                                                                                      | 2.036 to 25.020°                                                   |
| Limiting indices                            | -16 ≤ h ≤ 17,<br>-20 ≤ k ≤ 17,<br>-22 ≤ l ≤ 15      | -14 ≤ h ≤ 14,<br>-16 ≤ k ≤ 14,<br>-29 ≤ l ≤ 24                                                                      | -16 ≤ h ≤ 16,<br>-18 ≤ k ≤ 19,<br>-21 ≤ l ≤ 17                     |
| Reflections collected                       | 23326                                               | 20792                                                                                                               | 19253                                                              |
| Reflections unique                          | 8471 [R(int) = 0.0609]                              | 14044 [R(int) = 0.0507]                                                                                             | 13602 [R(int) = 0.1415]                                            |
| Data/restraints/parameters                  | 8471 / 486 / 458                                    | 14044 / 147 / 947                                                                                                   | 13602 / 45 / 911                                                   |
| Goodness-of-fit on F <sup>2</sup>           | 1.056                                               | 1.083                                                                                                               | 1.071                                                              |
| Final R indexes [I ≥ 2σ (I)]                | R1 = 0.0448,<br>wR2 = 0.1036                        | R1 = 0.0640,<br>wR2 = 0.0950                                                                                        | R1 = 0.1430,<br>wR2 = 0.2882                                       |
| R indexes [all data]                        | R1 = 0.0812,<br>wR2 = 0.1146                        | R1 = 0.1465,<br>wR2 = 0.1048                                                                                        | R1 = 0.2264,<br>wR2 = 0.3169                                       |
| Largest diff. peak/hole / e Å <sup>-3</sup> | 0.554 and -0.612 e.Å <sup>-3</sup>                  | 0.827 and -0.599 e.Å <sup>-3</sup>                                                                                  | 1.867 and -2.486 e.Å <sup>-3</sup>                                 |
